# Supplementary material for: The Role of Parathyroid Hormone-Related Protein (PTHrP) in Osteoblast Response to Microgravity: Mechanistic Implications for Osteoporosis Development
Source: PubMed Central journal article supplement (PMC4963112; doi:10.1371/journal.pone.0160034), 2016-07-27
Supplement: pone.0160034.s002.pdf [file pone.0160034.s002.pdf]

|       | Process number | Date L: launch | Hour | Minute | Growth Medium (ml) | PTHrP in Medium (ml) | Fixative (ml) | PBS (ml) |
|-------|----------------|----------------|------|--------|--------------------|----------------------|---------------|----------|
| Day 1 | 1              | L + 1          | 1    | 1      | 0                  | 3                    | 0             | 0        |
|       | 2              |                | 1    | 2      | 0                  | 5                    | 0             | 0        |
|       | 3              |                | 3    | 3      | 5                  | 0                    | 0             | 0        |
|       | 4              |                | 3    | 4      | 5                  | 0                    | 0             | 0        |
|       | 5              |                | 3    | 5      | 5                  | 0                    | 0             | 0        |
| Day 2 | 1              | L + 2          | 1    | 1      | 0                  | 3                    | 0             | 0        |
|       | 2              |                | 1    | 2      | 0                  | 5                    | 0             | 0        |
|       | 3              |                | 3    | 3      | 5                  | 0                    | 0             | 0        |
|       | 4              |                | 3    | 4      | 5                  | 0                    | 0             | 0        |
|       | 5              |                | 3    | 5      | 5                  | 0                    | 0             | 0        |
| Day 3 | 1              | L + 3          | 1    | 1      | 0                  | 3                    | 0             | 0        |
|       | 2              |                | 1    | 2      | 0                  | 5                    | 0             | 0        |
|       | 3              |                | 3    | 3      | 5                  | 0                    | 0             | 0        |
|       | 4              |                | 3    | 4      | 5                  | 0                    | 0             | 0        |
|       | 5              |                | 3    | 5      | 5                  | 0                    | 0             | 0        |
| Day 4 | 1              | L + 4          | 1    | 1      | 0                  | 3                    | 0             | 0        |
|       | 2              |                | 1    | 2      | 0                  | 5                    | 0             | 0        |
|       | 3              |                | 3    | 3      | 5                  | 0                    | 0             | 0        |
|       | 4              |                | 3    | 4      | 5                  | 0                    | 0             | 0        |
|       | 5              |                | 3    | 5      | 5                  | 0                    | 0             | 0        |
| Day 5 | 1              | L + 5          | 1    | 1      | 0                  | 3                    | 0             | 0        |
|       | 2              |                | 1    | 2      | 0                  | 5                    | 0             | 0        |
|       | 3              |                | 3    | 3      | 5                  | 0                    | 0             | 0        |
|       | 4              |                | 3    | 4      | 5                  | 0                    | 0             | 0        |
|       | 5              |                | 3    | 5      | 5                  | 0                    | 0             | 0        |
| Day 6 | 1              | L + 6          | 1    | 1      | 0                  | 3                    | 0             | 0        |
|       | 2              |                | 1    | 2      | 0                  | 5                    | 0             | 0        |
|       | 3              |                | 3    | 3      | 5                  | 0                    | 0             | 0        |
|       | 4              |                | 3    | 4      | 5                  | 0                    | 0             | 0        |
|       | 5              |                | 3    | 5      | 5                  | 0                    | 0             | 0        |
| Day 7 | 1              | L + 7          | 0    | 1      | 0                  | 0                    | 0             | 5        |
|       | 2              |                | 0    | 2      | 0                  | 0                    | 0             | 5        |
|       | 3              |                | 0    | 3      | 0                  | 0                    | 0             | 5        |
|       | 4              |                | 0    | 4      | 0                  | 0                    | 0             | 5        |
|       | 5              |                | 2    | 5      | 0                  | 0                    | 5             | 0        |
|       | 6              |                | 2    | 6      | 0                  | 0                    | 5             | 0        |
|       | 7              |                | 2    | 7      | 0                  | 0                    | 5             | 0        |
|       | 8              |                | 2    | 8      | 0                  | 0                    | 5             | 0        |
|       | 9              |                | 2    | 9      | 0                  | 0                    | 0             | 5        |
|       | 10             |                | 2    | 10     | 0                  | 0                    | 0             | 5        |
|       | 11             |                | 2    | 11     | 0                  | 0                    | 0             | 5        |
|       | 12             |                | 2    | 12     | 0                  | 0                    | 0             | 5        |
|       | 13             |                | 2    | 13     | 0                  | 0                    | 0             | 5        |
