# Supplementary material for: The Role of Parathyroid Hormone-Related Protein (PTHrP) in Osteoblast Response to Microgravity: Mechanistic Implications for Osteoporosis Development
Source: PubMed Central journal article supplement (PMC4963112; doi:10.1371/journal.pone.0160034), 2016-07-27
Supplement: pone.0160034.s003.pdf [file pone.0160034.s003.pdf]

## S2 A and B Table: Genes affected by 6 days of simulated microgravity

### S2 A Table

#### Genes (59) upregulated by 6 days of simulated microgravity (fold change > 2.0, p < 0.05)

| Target ID         | Definition (all probes : <i>Mus musculus</i> )                                                                 | RefSeq ID                     | Fold change          | Upregulated by ablation |
|-------------------|----------------------------------------------------------------------------------------------------------------|-------------------------------|----------------------|-------------------------|
| PLF2              | Mus musculus prolactin family 2, subfamily c, member 3 (Pr12c3), mRNA.                                         | NM_011118.1                   | 12.81098             | *                       |
| MRPPLF3           | Mus musculus prolactin family 2, subfamily c, member 4 (Pr12c4), mRNA.                                         | NM_011954.2                   | 11.76853             | *                       |
| AQP5              | Mus musculus aquaporin 5 (Aqp5), mRNA.<br>PREDICTED: Mus musculus similar to aquaporin 5 (LOC100046616), mRNA. | NM_009701.4<br>XM_001476512.1 | 7.790976<br>3.627969 | *                       |
| CCK               | Mus musculus cholecystokinin (Cck), mRNA.                                                                      | NM_031161.2                   | 5.513795             | No                      |
| INHBB             | PREDICTED: Mus musculus similar to Inhb protein (LOC100046802), mRNA.                                          | XM_001476835.1                | 4.413428             | No                      |
| GREM1             | Mus musculus gremlin1 (Grem1), mRNA                                                                            | NM_011824.1                   | 4.151464             | *                       |
| GPC1              | Mus musculus glypican 1 (Gpc1), mRNA.                                                                          | NM_016696.3                   | 4.13393              | *                       |
| ALDH3A1           | Mus musculus aldehyde dehydrogenase family 3, subfamily A1 (Aldh3a1), mRNA.                                    | NM_007436.1                   | 3.821048             | *                       |
| ASS1              | Mus musculus argininosuccinate synthetase 1 (Ass1), mRNA.                                                      | NM_007494.3                   | 3.663361             | *                       |
| NKD2              | Mus musculus naked cuticle 2 homolog (Drosophila) (Nkd2), mRNA.                                                | NM_028186.3                   | 3.63063              | *                       |
| NQO1              | Mus musculus NAD(P)H dehydrogenase, quinone 1 (Nqo1), mRNA.                                                    | NM_008706.4                   | 3.439677             | *                       |
| INHBA             | Mus musculus inhibin beta-A (Inhba), mRNA.                                                                     | NM_008380.1                   | 3.374437             | *                       |
| COLM              | Mus musculus gliomedin (Gldn), mRNA.                                                                           | NM_177350.4                   | 3.366197             | No                      |
| HIST1H4H          | Mus musculus histone cluster 1, H4h (Hist1h4h), mRNA.                                                          | NM_153173.2                   | 3.122563             | *                       |
| HSPB1             | Mus musculus heat shock protein 1 (Hspb1), mRNA.                                                               | NM_013560.1                   | 2.937195             | *                       |
| CRIP2             | Mus musculus cysteine rich protein 2 (Crip2), mRNA.                                                            | NM_024223.1                   | 2.87678              | *                       |
| TIMP3             | Mus musculus tissue inhibitor of metalloproteinase 3 (Timp3), mRNA.                                            | NM_011595.2<br>NM_011595.2    | 2.833766<br>2.168426 | *                       |
| PRSS19            | Mus musculus kallikrein related-peptidase 8 (Klk8), mRNA.                                                      | NM_008940.2                   | 2.649386             | No                      |
| ESD               | Mus musculus esterase D/formylglutathione hydrolase (Esd), mRNA.                                               | NM_016903.2                   | 2.617979             | *                       |
| PRELP             | Mus musculus proline arginine-rich end leucine-rich repeat (Prelp), mRNA.                                      | NM_054077.3                   | 2.563206             | *                       |
| 1110032E2<br>3RIK | Mus musculus RIKEN cDNA 1110032E23 gene (1110032E23Rik), mRNA.                                                 | NM_133187.2                   | 2.532211             | *                       |
| GDF15             | Mus musculus growth differentiation factor 15 (Gdf15), mRNA.                                                   | NM_011819.1                   | 2.506674             | *                       |
| FOSB              | Mus musculus FBJ osteosarcoma oncogene B (Fosb), mRNA.                                                         | NM_008036.2                   | 2.464137             | No                      |
| AHRR              | Mus musculus aryl-hydrocarbon receptor repressor (Ahrr), mRNA.                                                 | NM_009644.2                   | 2.366026             | *                       |
| NBL1              | Mus musculus neuroblastoma, suppression of tumorigenicity 1 (Nbl1), mRNA.                                      | NM_008675.1                   | 2.362421             | *                       |
| CRYAB             | Mus musculus crystallin, alpha B (Cryab), mRNA.                                                                | NM_009964.1                   | 2.332638             | *                       |
| FABP3             | Mus musculus fatty acid binding protein 3, muscle and heart (Fabp3), mRNA.                                     | NM_010174.1                   | 2.32906              | *                       |
| MDM2              | Mus musculus transformed mouse 3T3 cell double minute 2 (Mdm2), mRNA.                                          | NM_010786.2<br>NM_010786.3    | 2.31834<br>2.246531  | *                       |
| KCTD10            | Mus musculus potassium channel tetramerisation domain containing 10 (Kctd10), mRNA.                            | NM_026145.3                   | 2.279135             | *                       |
| SGK               | Mus musculus serum/glucocorticoid regulated kinase 1 (Sgk1), mRNA.                                             | NM_011361.1                   | 2.240079             | *                       |
| ANK               | Mus musculus progressive ankylosis (Ank), mRNA.                                                                | NM_020332.3                   | 2.228785             | *                       |
| EPHX1             | Mus musculus epoxide hydrolase 1, microsomal (Ephx1), mRNA.                                                    | NM_010145.2                   | 2.215451             | *                       |
| WHRN              | Mus musculus whirlin (Whrn), transcript variant 3, mRNA.                                                       | NM_001008792.1                | 2.202689             | *                       |
| CD44              | Mus musculus CD44 antigen (Cd44), transcript variant 2, mRNA.                                                  | NM_001039150.1                | 2.195092             | *                       |
| CTGF              | Mus musculus connective tissue growth factor (Ctgf), mRNA.                                                     | NM_010217.1                   | 2.193812             | *                       |
| SCX               | Mus musculus scleraxis (Scx), mRNA.                                                                            | NM_198885.2                   | 2.185468             | *                       |

|               |                                                                                                          |                            |                      |    |
|---------------|----------------------------------------------------------------------------------------------------------|----------------------------|----------------------|----|
| MUSTN1        | Mus musculus musculoskeletal, embryonic nuclear protein 1 (Mustn1), mRNA.                                | NM_181390.1<br>NM_181390.2 | 2.185364<br>2.109783 | *  |
| HIST1H2BJ     | Mus musculus histone cluster 1, H2bj (Hist1h2bj), mRNA.                                                  | NM_178198.1                | 2.173656             | *  |
| EEF1A2        | Mus musculus eukaryotic translation elongation factor 1 alpha 2 (Eef1a2), mRNA.                          | NM_007906.2<br>NM_007906.2 | 2.153269<br>2.025144 | *  |
| TNFRSF11B     | Mus musculus tumor necrosis factor receptor superfamily, member 11b (osteoprotegerin) (Tnfrsf11b), mRNA. | NM_008764.3                | 2.129809             | *  |
| HOXC6         | Mus musculus homeo box C6 (Hoxc6), mRNA.                                                                 | NM_010465.2                | 2.107019             | *  |
| AEBP1         | Mus musculus AE binding protein 1 (Aebp1), mRNA.                                                         | NM_009636.1                | 2.102786             | No |
| 2300002D11RIK | Mus musculus RIKEN cDNA 2300002D11 gene (2300002D11Rik), mRNA.                                           | NM_001081156.1             | 2.097322             | *  |
| BDNF          | Mus musculus brain derived neurotrophic factor (Bdnf), transcript variant 3, mRNA.                       | NM_001048141.1             | 2.091327             | *  |
| HSPB8         | Mus musculus heat shock protein 8 (Hspb8), mRNA.                                                         | NM_030704.1                | 2.090601             | *  |
| PDGFA         | Mus musculus platelet-derived growth factor A type receptor (Pdgfa), mRNA.                               |                            | 2.084386             | *  |
| CCNG1         | Mus musculus cyclin G1 (Ccng1), mRNA.                                                                    | NM_009831.2                | 2.083259             | *  |
| AKR1C18       | Mus musculus aldo-keto reductase family 1, member C18 (Akr1c18), mRNA.                                   | NM_134066.2                | 2.073836             | No |
| HIST1H2BM     | Mus musculus histone cluster 1, H2bm (Hist1h2bm), mRNA.                                                  | NM_178200.1                | 2.072647             | *  |
| HIST1H2BH     | Mus musculus histone cluster 1, H2bh (Hist1h2bh), mRNA.                                                  | NM_178197.1                | 2.069317             | *  |
| HIST1H2BF     | Mus musculus histone cluster 1, H2bf (Hist1h2bf), mRNA.                                                  | NM_178195.1                | 2.066524             | *  |
| COL7A1        | Mus musculus collagen, type VII, alpha 1 (Col7a1), mRNA.                                                 | NM_007738.3                | 2.044317             | *  |
| A630005A06RIK | Mus musculus TBC1 domain family, member 2 (Tbc1d2), mRNA.                                                | NM_198664.3                | 2.044002             | *  |
| GSTP1         | Mus musculus glutathione S-transferase, pi 1 (Gstp1), mRNA.                                              | NM_013541.1                | 2.039079             | *  |
| TNFRSF12A     | Mus musculus tumor necrosis factor receptor superfamily, member 12a (Tnfrsf12a), mRNA.                   | NM_013749.1                | 2.026671             | *  |
| SNRPN         | Mus musculus SNRPN upstream reading frame (Snurf), mRNA.                                                 | NM_033174.2                | 2.014161             | *  |
| HIST1H2BK     | Mus musculus histone cluster 1, H2bk (Hist1h2bk), mRNA.                                                  | NM_175665.1                | 2.012974             | *  |
| STMN2         | Mus musculus stathmin-like 2 (Stmn2), mRNA.                                                              | NM_025285.2                | 2.007183             | *  |
| DOS           | Mus musculus downstream of Stk11 (Dos), mRNA.                                                            | NM_015761.2                | 2.00261              | *  |

## S2 B Table

**Genes (129) downregulated by 6 days of simulated microgravity (fold change < 0.5, p < 0.05)**

| Target ID     | Definition (all probes : <i>Mus musculus</i> )                                       | RefSeq ID                                    | Fold change                         | Down-regulated by ablation |
|---------------|--------------------------------------------------------------------------------------|----------------------------------------------|-------------------------------------|----------------------------|
| SFRP2         | Mus musculus secreted frizzled-related protein 2 (Sfrp2), mRNA.                      | NM_009144.1                                  | 0.1316429                           | *                          |
| PTN           | Mus musculus pleiotrophin (Ptn), mRNA.                                               | NM_008973.2                                  | 0.1557338                           | *                          |
| IGFBP5        | Mus musculus insulin-like growth factor binding protein 5 (Igfbp5), mRNA.            | NM_010518.2                                  | 0.1603545                           | *                          |
| 1500015O10RIK | Mus musculus RIKEN cDNA 1500015O10 gene (1500015O10Rik), mRNA.                       | NM_024283.2                                  | 0.1804316                           | *                          |
| IGF2          | Mus musculus insulin-like growth factor 2 (Igf2), mRNA.                              | NM_010514.2                                  | 0.2085582                           | *                          |
| CLU           | PREDICTED: Mus musculus similar to clusterin (LOC100046120), mRNA.                   | XM_001475611.1                               | 0.213665                            | *                          |
| CXCL12        | Mus musculus chemokine (C-X-C motif) ligand 12 (Cxcl12), transcript variant 1, mRNA. | NM_013655.2<br>NM_021704.2<br>NM_001012477.1 | 0.2150201<br>0.2234856<br>0.236011  | *                          |
| HP            | Mus musculus haptoglobin (Hp), mRNA.                                                 | NM_017370.1<br>NM_017370.1<br>NM_017370.1    | 0.2222102<br>0.4034571<br>0.4659876 | *                          |

|               |                                                                                                               |                            |                        |    |
|---------------|---------------------------------------------------------------------------------------------------------------|----------------------------|------------------------|----|
| C3            | Mus musculus mouse complement 3, mRNA.                                                                        | NM_009778.1                | 0.2325967              | *  |
| SCARA5        | Mus musculus scavenger receptor class A, member 5 (putative) (Scara5), mRNA.                                  | NM_028903.1                | 0.2351416              | *  |
| LUM           | Mus musculus lumican (Lum), mRNA.                                                                             | NM_008524.1                | 0.235224               | *  |
| MRC1          | Mus musculus mannose receptor, C type 1 (Mrc1), mRNA.                                                         | NM_008625.1                | 0.253038               | *  |
| 4930583H14RIK | Mus musculus RIKEN cDNA 4930583H14 gene (4930583H14Rik), mRNA.                                                | NM_026358.2                | 0.2575598              | *  |
| 2310061N23RIK | Mus musculus interferon, alpha-inducible protein 27 (Ifi27), mRNA.                                            | NM_029803.1                | 0.2600992              | *  |
| DCN           | Mus musculus decorin (Dcn), mRNA.                                                                             | NM_007833.4<br>NM_007833.4 | 0.2889794<br>0.3837174 | *  |
| H19           | Mus musculus H19 fetal liver mRNA (H19), non-coding RNA.                                                      | NR_001592.1                | 0.2906019              | *  |
| PPP1R3C       | Mus musculus protein phosphatase 1, regulatory (inhibitor) subunit 3C (Ppp1r3c), mRNA.                        | NM_016854.2                | 0.2954025              | *  |
| RBM3          | PREDICTED: Mus musculus similar to RNA binding motif protein 3 (LOC100043257), mRNA.                          | XM_001480197.1             | 0.2991486              | *  |
| APOD          | PREDICTED: Mus musculus similar to apolipoprotein D (LOC100047583), mRNA.                                     | XM_001479138.1             | 0.2996465              | *  |
| ITM2A         | Mus musculus integral membrane protein 2A (Itm2a), mRNA.                                                      | NM_008409.2                | 0.2997355              | *  |
| D930038M13RIK | Mus musculus ABI gene family, member 3 (NESH) binding protein (Abi3bp), transcript variant 1, mRNA.           | NM_178790.3                | 0.3036303              | *  |
| PFKL          | Mus musculus phosphofructokinase, liver, B-type (Pfk1), mRNA.                                                 | NM_008826.3                | 0.3054363              | *  |
| BMP4          | Mus musculus bone morphogenetic protein 4 (Bmp4), mRNA.                                                       | NM_007554.2                | 0.3117725              | No |
| OLFML1        | Mus musculus olfactomedin-like 1 (Olfml1), mRNA.                                                              | NM_172907.2                | 0.3123395              | *  |
| HIST1H2AD     | Mus musculus histone cluster 1, H2ad (Hist1h2ad), mRNA.                                                       | NM_178188.3                | 0.3149356              | *  |
| DLK1          | Mus musculus delta-like 1 homolog (Drosophila) (Dlk1), mRNA.                                                  | NM_010052.4                | 0.3273854              | *  |
| HIST1H2AK     | Mus musculus histone cluster 1, H2ak (Hist1h2ak), mRNA.                                                       | NM_178183.1                | 0.3372404              | *  |
| 2310056P07RIK | Mus musculus family with sequence similarity 162, member A (Fam162a), mRNA.                                   | NM_027342.1                | 0.3391683              | *  |
| HIST1H2AF     | Mus musculus histone cluster 1, H2af (Hist1h2af), mRNA.                                                       | NM_175661.1                | 0.3396376              | *  |
| SLC1A3        | Mus musculus solute carrier family 1 (glial high affinity glutamate transporter), member 3 (Slc1a3), mRNA.    | NM_148938.2                | 0.3399492              | *  |
| PSCDBP        | Mus musculus cytohesin 1 interacting protein (Cytip), mRNA.                                                   | NM_139200.4                | 0.3403133              | *  |
| D0H4S114      | Mus musculus DNA segment, human D4S114 (D0H4S114), mRNA.                                                      | NM_053078.3                | 0.3474809              | No |
| NID2          | Mus musculus nidogen 2 (Nid2), mRNA.                                                                          | NM_008695.2                | 0.3477556              | *  |
| TGFB1         | Mus musculus transforming growth factor, beta induced (Tgfb1), mRNA.                                          | NM_009369.1                | 0.3514812              | *  |
| HIST1H2AH     | Mus musculus histone cluster 1, H2ah (Hist1h2ah), mRNA.                                                       | NM_175659.1                | 0.352093               | *  |
| FMO1          | Mus musculus flavin containing monooxygenase 1 (Fmo1), mRNA.                                                  | NM_010231.2                | 0.3568025              | *  |
| EGLN3         | Mus musculus EGL nine homolog 3 (C. elegans) (Egln3), mRNA.                                                   | NM_028133.1                | 0.3569504              | *  |
| DPEP2         | Mus musculus dipeptidase 2 (Dpep2), mRNA.                                                                     | NM_176913.3<br>NM_176913.3 | 0.3577472<br>0.3965119 | *  |
| COL3A1        | Mus musculus collagen, type III, alpha 1 (Col3a1), mRNA.                                                      | NM_009930.1                | 0.3599768              | *  |
| 1200009O22RIK | Mus musculus RIKEN cDNA 1200009O22 gene (1200009O22Rik), mRNA.                                                | NM_025817.3                | 0.3616481              | *  |
| HIST1H2AO     | Mus musculus histone cluster 1, H2ao (Hist1h2ao), mRNA.                                                       | NM_178185.1                | 0.3618695              | *  |
| AGTR1A        | Mus musculus angiotensin II receptor, type 1a (Agtr1a), mRNA.                                                 | NM_177322.2                | 0.3640873              | *  |
| LDB2          | Mus musculus LIM domain binding protein (Ldb2), mRNA                                                          | NM_010698.2                | 0.3694307              | *  |
| DPT           | Mus musculus dermatopontin (Dpt), mRNA.                                                                       | NM_019759.2                | 0.369822               | *  |
| 633040615RIK  | Mus musculus RIKEN cDNA 633040615 gene (633040615Rik), mRNA.                                                  | NM_027519.1                | 0.3718243              | *  |
| RASSF4        | Mus musculus Ras association (RalGDS/AF-6) domain family member 4 (Rassf4), mRNA.                             | NM_178045.3<br>NM_178045.3 | 0.372338<br>0.3845508  | *  |
| PDGFRA        | Mus musculus platelet derived growth factor receptor, alpha polypeptide (Pdgfra), transcript variant 1, mRNA. | NM_011058.2                | 0.3755132              | *  |
| HIST1H2AN     | Mus musculus histone cluster 1, H2an (Hist1h2an), mRNA.                                                       | NM_178184.1                | 0.3776532              | *  |

|                   |                                                                                                                    |                                              |                                     |    |
|-------------------|--------------------------------------------------------------------------------------------------------------------|----------------------------------------------|-------------------------------------|----|
| ZCCHC5            | Mus musculus zinc finger, CCHC domain containing 5 (Zcchc5), mRNA.                                                 | NM_199468.1                                  | 0.3839341                           | No |
| SCARA3            | Mus musculus scavenger receptor class A, member 3 (Scara3), mRNA.                                                  | NM_172604.3                                  | 0.3876348                           | No |
| IGFBP3            | Mus musculus insulin-like growth factor binding protein 3 (Igfbp3), mRNA.                                          | NM_008343.2                                  | 0.3878084                           | *  |
| AOC3              | Mus musculus amine oxidase, copper containing 3 (Aoc3), mRNA.                                                      | NM_009675.1                                  | 0.390921                            | *  |
| KNG1              | Mus musculus kininogen 1 (Kng1), mRNA.                                                                             | NM_023125.2                                  | 0.3914529                           | *  |
| SERPING1          | Mus musculus serine (or cysteine) peptidase inhibitor, clade G, member 1 (Serp1), mRNA.                            | NM_009776.1                                  | 0.3939361                           | *  |
| SFRP1             | Mus musculus secreted frizzled-related protein 1 (Sfrp1), mRNA.                                                    | NM_013834.1                                  | 0.3966504                           | *  |
| 633040615<br>RIK  | Mus musculus RIKEN cDNA 633040615 gene (633040615Rik), mRNA.                                                       | NM_027519.3                                  | 0.3991528                           | *  |
| IGFBP4            | Mus musculus insulin-like growth factor binding protein 4 (Igfbp4)                                                 | NM_010517.2                                  | 0.399539                            | No |
| EMR1              | Mus musculus EGF-like module containing, mucin-like, hormone receptor-like sequence 1 (Emr1), mRNA.                | NM_010130.3<br>NM_010130.1                   | 0.4002873<br>0.4839607              | *  |
| SIRPB1            | Mus musculus signal-regulatory protein beta 1 (Sirpb1), transcript variant 3, mRNA.                                | NM_001002898.1                               | 0.4006563                           | *  |
| CAR9              | Mus musculus carbonic anhydrase 9 (Car9), mRNA.                                                                    | NM_139305.1                                  | 0.401926                            | *  |
| SLC24A3           | Mus musculus solute carrier family 24 (sodium/potassium/calcium exchanger), member 3 (Slc24a3), mRNA.              | NM_053195.2                                  | 0.4027135                           | No |
| SRPX              | Mus musculus sushi-repeat-containing protein (SrpX), mRNA.                                                         | NM_016911.4<br>NM_016911.4                   | 0.4043711<br>0.4169736              | *  |
| LBP               | Mus musculus lipopolysaccharide binding protein (Lbp), mRNA.                                                       | NM_008489.2                                  | 0.4046987                           | *  |
| 2310006J04<br>RIK | Mus musculus ankyrin repeat domain 37 (Ankrd37), mRNA.                                                             | NM_001039562.1                               | 0.4075139                           | No |
| CCR5              | Mus musculus chemokine (C-C motif) receptor 5 (Ccr5), mRNA.                                                        | NM_009917.2<br>NM_009917.2<br>NM_001008702.1 | 0.4091699<br>0.4434175<br>0.4461237 | *  |
| RAMP2             | Mus musculus receptor (calcitonin) activity modifying protein 2 (Ramp2), mRNA.                                     | NM_019444.2                                  | 0.4105468                           | *  |
| LSP1              | PREDICTED: Mus musculus predicted gene, ENSMUSG00000043795 (ENSMUSG00000043795), mRNA.                             | XM_001480835.1                               | 0.4114556                           | *  |
| CDKN1C            | Mus musculus cyclin-dependent kinase inhibitor 1C (P57) (Cdkn1c), mRNA.                                            | NM_009876.3                                  | 0.4116614                           | *  |
| CORO1A            | Mus musculus coronin, actin binding protein 1A (Coro1a), mRNA.                                                     | NM_009898.2<br>NM_009898.2<br>NM_009898.2    | 0.4127754<br>0.4435945<br>0.4970813 | *  |
| C1QA              | Mus musculus complement component 1, q subcomponent, alpha polypeptide (C1qa), mRNA.                               | NM_007572.2                                  | 0.4128893                           | *  |
| ELN               | Mus musculus elastin (Eln), mRNA.                                                                                  | NM_007925.3                                  | 0.4149198                           | No |
| SLC2A1            | Mus musculus solute carrier family 2 (facilitated glucose transporter), member 1 (Slc2a1), mRNA.                   | NM_011400.2                                  | 0.4167042                           | *  |
| GPR23             | Mus musculus G protein-coupled receptor 23 (Gpr23), mRNA.                                                          | NM_175271.2                                  | 0.4254305                           | *  |
| PDK1              | Mus musculus pyruvate dehydrogenase kinase, isoenzyme 1 (Pdk1), nuclear gene encoding mitochondrial protein, mRNA. | NM_172665.3                                  | 0.4255101                           | *  |
| CTSC              | Mus musculus cathepsin C (Ctsc), mRNA.                                                                             | NM_009982.2                                  | 0.4265272                           | *  |
| OASL2             | Mus musculus 2'-5' oligoadenylate synthetase-like 2 (Oasl2), mRNA.                                                 | NM_011854.1                                  | 0.4272569                           | *  |
| C1QB              | Mus musculus complement component 1, q subcomponent, beta polypeptide (C1qb), mRNA.                                | NM_009777.2                                  | 0.4278048                           | *  |
| DAB2              | Mus musculus disabled homolog 2 (Drosophila) (Dab2), transcript variant 2, mRNA.                                   | NM_023118.1                                  | 0.4278204                           | *  |
| RSPO3             | Mus musculus R-spondin 3 homolog (Xenopus laevis) (Rspo3), mRNA.                                                   | NM_028351.2                                  | 0.4293909                           | *  |
| MFAP2             | Mus musculus microfibrillar-associated protein 2 (Mfap2), mRNA.                                                    | NM_008546.2<br>NM_008546.2<br>NM_008546.2    | 0.4296708<br>0.4759155<br>0.4945922 | *  |
| GMFG              | Mus musculus glia maturation factor, gamma (Gmfg), transcript variant 1, mRNA.                                     | NM_022024.2<br>NM_022024.2                   | 0.4302362<br>0.4870403              | *  |
| SELENBP1          | PREDICTED: Mus musculus hypothetical protein LOC100044204 (LOC100044204), mRNA.                                    | XM_001471696.1                               | 0.433163                            | *  |
| CAPN6             | Mus musculus calpain 6 (Capn6), mRNA.                                                                              | NM_007603.2                                  | 0.4346417                           | No |
| MEST              | Mus musculus mesoderm specific transcript (Mest), mRNA.                                                            | NM_008590.1<br>NM_008590.1                   | 0.4349252<br>0.4556044              | *  |

|                   |                                                                                                                                 |                |           |    |
|-------------------|---------------------------------------------------------------------------------------------------------------------------------|----------------|-----------|----|
| MME               | Mus musculus membrane metallo endopeptidase (Mme), mRNA.                                                                        | NM_008604.2    | 0.4350618 | *  |
| NDRG1             | Mus musculus N-myc downstream regulated gene 1 (NdrG1), mRNA.                                                                   | NM_008681.2    | 0.4352534 | No |
| MS4A6D            | Mus musculus membrane-spanning 4-domains, subfamily A, member 6D (Ms4a6d), mRNA.                                                | NM_026835.2    | 0.4373044 | *  |
| ALOX5AP           | Mus musculus arachidonate 5-lipoxygenase activating protein (Alox5ap), mRNA.                                                    | NM_009663.1    | 0.4387523 | *  |
| HIST1H2AG         | Mus musculus histone cluster 1, H2ag (Hist1h2ag), mRNA.                                                                         | NM_178186.2    | 0.4395184 | *  |
| 1300002F1<br>3RIK | Mus musculus ERBB receptor feedback inhibitor 1 (Errfi1), mRNA.                                                                 | NM_133753.1    | 0.4395548 | *  |
| EVI2A             | Mus musculus ecotropic viral integration site 2a (Evi2a), transcript variant 2, mRNA.                                           | NM_010161.3    | 0.4402088 | *  |
| CXCL4             | Mus musculus chemokine (C-X-C motif) ligand 4 (Cxcl4), mRNA.                                                                    | NM_019932.2    | 0.4419611 | *  |
| 1190002H2<br>3RIK | Mus musculus RIKEN cDNA 1190002H23 gene (1190002H23rik), mRNA.                                                                  | NM_025427.2    | 0.4430251 | *  |
| DAB2              | Mus musculus disabled homolog 2 (Drosophila) (Dab2), transcript variant 2, mRNA.                                                | NM_001008702.1 | 0.4450885 | *  |
| ENO1              | Mus musculus enolase 1, alpha non-neuron (Eno1), mRNA.                                                                          | NM_023119.1    | 0.4461543 | *  |
| LYZ               | Mus musculus lysozyme 1 (Lyz1), mRNA.                                                                                           | NM_013590.3    | 0.4473266 | *  |
| CD52              | Mus musculus CD52 antigen (Cd52), mRNA.                                                                                         | NM_013706.1    | 0.44963   | *  |
| NDRL              | Mus musculus N-myc downstream gene (Ndr1), mRNA.                                                                                |                | 0.4504366 | *  |
| CYP7B1            | Mus musculus cytochrome P450, family 7, subfamily b, polypeptide 1 (Cyp7b1), mRNA.                                              | NM_007825.3    | 0.450876  | *  |
| PPP3CA            | Mus musculus protein phosphatase 3, catalytic subunit, alpha isoform (Ppp3ca), mRNA.                                            | NM_008913.1    | 0.4521215 | No |
| PIRA4             | Mus musculus paired-Ig-like receptor A4 (Pira4), mRNA.                                                                          | NM_011091.1    | 0.4527747 | *  |
| RARRES2           | Mus musculus retinoic acid receptor responder (tazarotene induced) 2 (Rarres2), mRNA.                                           | NM_027852.1    | 0.4537163 | *  |
| CD14              | Mus musculus CD14 antigen (Cd14), mRNA.                                                                                         | NM_009841.3    | 0.4582975 | *  |
| ODZ4              | Mus musculus odd Oz/ten-m homolog 4 (Drosophila) (Odz4), mRNA.                                                                  | NM_011858.3    | 0.4619088 | No |
| ALDH3B1           | Mus musculus aldehyde dehydrogenase 3 family, member B1 (Aldh3b1), mRNA.                                                        | NM_026316.2    | 0.4627661 | *  |
| OGN               | Mus musculus osteoglycin (Ogn), mRNA.                                                                                           | NM_008760.2    | 0.4635047 | No |
| KCNAB2            | Mus musculus potassium voltage-gated channel, shaker-related subfamily, beta member 2 (Kcnab2), mRNA.                           | NM_010598.2    | 0.4659567 | *  |
| C1QG              | Mus musculus complement component 1, q subcomponent, C chain (C1qc), mRNA.                                                      | NM_007574.2    | 0.468035  | *  |
| GALNT9            | Mus musculus UDP-N-acetyl-alpha-D-galactosamine:polypeptide N-acetylgalactosaminyltransferase 9 (Galnt9), mRNA.                 | NM_198306.1    | 0.4683551 | *  |
| ADD3              | Mus musculus adducin 3 (gamma) (Add3), mRNA.                                                                                    | NM_013758.2    | 0.4687887 | *  |
| ZFP36L1           | Mus musculus zinc finger protein 36, C3H type-like 1 (Zfp36l1), mRNA.                                                           | NM_007564.4    | 0.4703194 | *  |
| HEMP1             | Mus musculus NCK associated protein 1 like (Nckap1l), mRNA.                                                                     | NM_153505.4    | 0.4709411 | *  |
| LGMN              | Mus musculus legumain (Lgmn), mRNA.                                                                                             | NM_011175.2    | 0.4770529 | *  |
| 2810046M2<br>2RIK |                                                                                                                                 | NM_026621.1    | 0.4778584 | No |
| TXNIP             | Mus musculus thioredoxin interacting protein (Txnip), transcript variant 1, mRNA.                                               | NM_001009935.2 | 0.4827267 | *  |
| EHD4              | Mus musculus EH-domain containing 4 (Ehd4), mRNA.                                                                               | NM_133838.4    | 0.483588  | *  |
| LDH1              | Mus musculus lactate dehydrogenase A (Ldha), mRNA.                                                                              | NM_010699.1    | 0.4844018 | No |
| ARHGAP20          | Mus musculus Rho GTPase activating protein 20 (Arhgap20), mRNA.                                                                 | NM_175535.3    | 0.4859805 | *  |
| PTX3              | Mus musculus pentaxin related gene (Ptx3) mRNA.                                                                                 | NM_008987.2    | 0.4867727 | *  |
| ENTPD2            | Mus musculus ectonucleoside triphosphate diphosphohydrolase 2 (Entpd2), mRNA.                                                   | NM_009849.1    | 0.4874467 | No |
| NCF4              | Mus musculus neutrophil cytosolic factor 4 (Ncf4), mRNA.                                                                        | NM_008677.1    | 0.4881307 | *  |
| PFC               | Mus musculus complement factor properdin (Cfp), mRNA.                                                                           | NM_008823.3    | 0.488737  | *  |
| SMARCA1           | Mus musculus SWI/SNF related, matrix associated, actin dependent regulator of chromatin, subfamily a, member 1 (Smarca1), mRNA. | NM_053123.3    | 0.4911543 | *  |

|                   |                                                                                         |             |           |    |
|-------------------|-----------------------------------------------------------------------------------------|-------------|-----------|----|
| FCER1G            | Mus musculus Fc receptor IgE high affinity 1 gamma polypeptide (Fcer1g) mRNA            | NM_010185.2 | 0.4915371 | *  |
| CENPA             | Mus musculus centromere protein A (Cenpa), mRNA.                                        | NM_007681.2 | 0.4943203 | *  |
| MIF               | Mus musculus macrophage migration inhibitory factor (Mif), mRNA.                        | NM_010798.2 | 0.4948902 | No |
| 1200002N1<br>4RIK | Mus musculus RIKEN cDNA 1200002N14 gene (1200002N14Rik), mRNA.                          | NM_027878.2 | 0.4949315 | *  |
| TK1               | Mus musculus thymidine kinase 1 (Tk1), mRNA.                                            | NM_009387.1 | 0.4950169 | *  |
| ALDOA             | Mus musculus aldolase A, fructose-bisphosphate (Aldoa), mRNA.                           | NM_007438.3 | 0.4959253 | *  |
| SLPI              | Mus musculus secretory leukocyte peptidase inhibitor (Slpi), mRNA.                      | NM_011414.2 | 0.4988716 | *  |
| DMN               | Mus musculus synemin, intermediate filament protein (Synm), transcript variant 3, mRNA. | NM_183312.3 | 0.4993148 | No |
