# Supplementary material for: The Role of Parathyroid Hormone-Related Protein (PTHrP) in Osteoblast Response to Microgravity: Mechanistic Implications for Osteoporosis Development
Source: PubMed Central journal article supplement (PMC4963112; doi:10.1371/journal.pone.0160034), 2016-07-27
Supplement: pone.0160034.s004.pdf [file pone.0160034.s004.pdf]

**S3 A and B Tables: Genes (763) affected by *Pthrp* ablation (at 1g).**

**S3 A Table: Genes (270) upregulated by *Pthrp* ablation (at 1g) (fold change > 2.0, p < 0.05)**

| Target ID      | Definition (all probes : <i>Mus musculus</i> )                                                                 | RefSeq ID                        | Fold change        | Up regulated by Og |
|----------------|----------------------------------------------------------------------------------------------------------------|----------------------------------|--------------------|--------------------|
| AQP5           | Mus musculus aquaporin 5 (Aqp5), mRNA.<br>PREDICTED: Mus musculus similar to aquaporin 5 (LOC100046616), mRNA. | NM_009701.4<br>XM_001476512.1    | 25.5869<br>9.54725 | *                  |
| PLF2           | Mus musculus prolactin family 2, subfamily c, member 3 (Prl2c3), mRNA.                                         | NM_011118.1                      | 20.6708            | *                  |
| MRPPLF3        | Mus musculus prolactin family 2, subfamily c, member 4 (Prl2c4), mRNA.                                         | NM_011954.2                      | 19.0465            | *                  |
| ESM1           | Mus musculus endothelial cell-specific molecule 1 (Esm1), mRNA.                                                | NM_023612.3                      | 11.5814            |                    |
| ANXA8          | Mus musculus annexin A8 (Anxa8), mRNA.                                                                         | NM_013473.3<br>NM_013473.2       | 11.0903<br>3.9279  |                    |
| NKD2           | Mus musculus naked cuticle 2 homolog ( <i>Drosophila</i> ) (Nkd2), mRNA.                                       | NM_028186.3                      | 9.96437            | *                  |
| NQO1           | Mus musculus NAD(P)H dehydrogenase, quinone 1 (Nqo1), mRNA.                                                    | NM_008706.4                      | 9.41091            | *                  |
| CRYAB          | Mus musculus crystallin, alpha B (Cryab), mRNA.                                                                | NM_009964.1                      | 9.13575            | *                  |
| ANK            | Mus musculus progressive ankylosis (Ank), mRNA.                                                                | NM_020332.3                      | 9.11502            | *                  |
| TNFRSF11B      | Mus musculus tumor necrosis factor receptor superfamily, member 11b (osteoprotegerin) (Tnfrsf11b), mRNA.       | NM_008764.3                      | 9.05821            | *                  |
| ADH7           | Mus musculus alcohol dehydrogenase 7 (class IV), mu or sigma polypeptide (Adh7), mRNA.                         | NM_009626.3                      | 8.11975            |                    |
| FABP3          | Mus musculus fatty acid binding protein 3, muscle and heart (Fabp3), mRNA.                                     | NM_010174.1                      | 7.70136            | *                  |
| BDNF           | Mus musculus brain derived neurotrophic factor (Bdnf), transcript variant 3, mRNA.                             | NM_001048141.1                   | 7.46112            | *                  |
| HIST1H4H       | Mus musculus histone cluster 1, H4h (Hist1h4h), mRNA.                                                          | NM_153173.2                      | 6.52552            | *                  |
| FHL1           | Mus musculus four and a half LIM domains 1 (Fhl1), transcript variant 1, mRNA.                                 | NM_001077361.1<br>NM_001077362.1 | 6.46872<br>6.12187 |                    |
| S3-12          | Mus musculus plasma membrane associated protein, S3-12 (S3-12), mRNA.                                          | NM_020568.2                      | 6.38498            |                    |
| INHBA          | Mus musculus inhibin beta-A (Inhba), mRNA.                                                                     | NM_008380.1                      | 6.03861            | *                  |
| 1110032E23 RIK | Mus musculus RIKEN cDNA 1110032E23 gene (1110032E23Rik), mRNA.                                                 | NM_133187.2                      | 5.50103            | *                  |
| GREM1          | Mus musculus gremlin1 (Grem1) mRNA.                                                                            | NM_011824.1                      | 5.17357            | *                  |
| CDH13          | Mus musculus cadherin 13 (Cdh13), mRNA.                                                                        | NM_019707.4<br>NM_019707.4       | 5.05871<br>2.57044 |                    |
| CD44           | Mus musculus CD44 antigen (Cd44), transcript variant 2, mRNA.                                                  | NM_001039150.1                   | 4.9279             | *                  |
| ESD            | Mus musculus esterase D/formylglutathione hydrolase (Esd), mRNA.                                               | NM_016903.2<br>NM_016903.2       | 4.78236<br>2.20099 | *                  |
| TIMP3          | Mus musculus tissue inhibitor of metalloproteinase 3 (Timp3), mRNA.                                            | NM_011595.2<br>NM_011595.2       | 4.71802<br>4.57388 | *                  |
| DSCR1          | Mus musculus Down syndrome critical region homolog 1 (Dscr1) mRNA.                                             | NM_019466.2                      | 4.5003             |                    |
| IRX3           | Mus musculus Iroquois related homeobox 3 ( <i>Drosophila</i> ) (Irx3), mRNA.                                   |                                  | 4.36278            |                    |
| PDLIM1         | Mus musculus PDZ and LIM domain 1 (elfin) (Pdlim1), mRNA.                                                      | NM_016861.3                      | 4.35651            |                    |
| 2300002D11 RIK | Mus musculus RIKEN cDNA 2300002D11 gene (2300002D11Rik), mRNA.                                                 | NM_001081156.1                   | 4.2774             | *                  |
| CRIP2          | Mus musculus cysteine rich protein 2 (Crip2), mRNA.                                                            | NM_024223.1                      | 4.26098            | *                  |
| SCX            | Mus musculus scleraxis (Scx), mRNA.                                                                            | NM_198885.2                      | 4.25152            | *                  |
| 1810008K03 RIK | Mus musculus ChaC, cation transport regulator-like 1 ( <i>E. coli</i> ) (Chac1), mRNA.                         | NM_026929.3                      | 4.23677            |                    |
| 2300002G24 RIK | Mus musculus cysteine-rich C-terminal 1 (Crct1), mRNA.                                                         | NM_028798.2                      | 4.20434            |                    |
| 3110050N22 RIK |                                                                                                                | NM_173181.1                      | 4.07191            |                    |

|                   |                                                                                                            |                                           |                               |   |
|-------------------|------------------------------------------------------------------------------------------------------------|-------------------------------------------|-------------------------------|---|
| ITGBL1            | Mus musculus integrin, beta-like 1 (Itgbl1), mRNA.                                                         | NM_145467.1                               | 4.06449                       |   |
| PHF17             | Mus musculus PHD finger protein 17 (Phf17), mRNA.                                                          | NM_172303.3                               | 4.03838                       |   |
| GPC1              | Mus musculus glypican 1 (Gpc1), mRNA.                                                                      | NM_016696.3                               | 4.00833                       | * |
| BC099439          | Mus musculus cDNA sequence BC099439 (BC099439), mRNA.                                                      | NM_001025564.1                            | 4.0077                        |   |
| MUSTN1            | Mus musculus musculoskeletal, embryonic nuclear protein 1 (Mustn1), mRNA.                                  | NM_181390.1<br>NM_181390.2                | 3.95709<br>3.09965            | * |
| FGF10             | Mus musculus fibroblast growth factor 10 (Fgf10), mRNA.                                                    | NM_008002.3<br>NM_008002.3                | 3.9152<br>3.88914             |   |
| WNT10A            | Mus musculus wingless related MMTV integration site 10a (Wnt10a), mRNA.                                    | NM_009518.1                               | 3.91059                       |   |
| GSTO1             | Mus musculus glutathione S-transferase omega 1 (Gsto1), mRNA.                                              | NM_010362.2                               | 3.84759                       |   |
| LOC217066         | Mus musculus predicted gene, OTTMUSG00000025408 (OTTMUSG00000025408), non-coding RNA.                      | NR_003564.1                               | 3.83718                       |   |
| TINAGL            | Mus musculus tubulointerstitial nephritis antigen-like (Tinagl), mRNA.                                     | NM_023476.1                               | 3.81307                       |   |
| ANKRD1            | Mus musculus ankyrin repeat domain 1 (cardiac muscle) (Ankrd1), mRNA.                                      | NM_013468.2                               | 3.79705                       |   |
| STMN2             | Mus musculus stathmin-like 2 (Stmn2), mRNA.                                                                | NM_025285.2                               | 3.76379                       | * |
| SNRPN             | Mus musculus SNRPN upstream reading frame (Snurf), mRNA.                                                   | NM_033174.2                               | 3.73681                       | * |
| RHOD              | Mus musculus ras homolog gene family, member D (Rhod), mRNA.                                               | NM_007485.2                               | 3.72967                       |   |
| HSPB1             | Mus musculus heat shock protein 1 (Hspb1), mRNA.                                                           | NM_013560.1                               | 3.68691                       | * |
| SLITRK5           | Mus musculus SLIT and NTRK-like family, member 5 (Slitrk5), mRNA.                                          | NM_198865.1                               | 3.6852                        |   |
| A630005A06<br>RIK | Mus musculus TBC1 domain family, member 2 (Tbc1d2), mRNA.                                                  | NM_198664.3                               | 3.51804                       | * |
| 3110050N22<br>RIK | Mus musculus family with sequence similarity 164, member A (Fam164a), mRNA.                                | NM_173181.3                               | 3.51754                       |   |
| DOS               | Mus musculus downstream of Stk11 (Dos), mRNA.                                                              | NM_015761.2                               | 3.47437                       | * |
| LTBP1             | Mus musculus latent transforming growth factor beta binding protein 1 (Ltbp1), transcript variant 2, mRNA. | NM_206958.1                               | 3.46436                       |   |
| TNFRSF12A         | Mus musculus tumor necrosis factor receptor superfamily, member 12a (Tnfrsf12a), mRNA.                     | NM_013749.1                               | 3.44943                       | * |
| AQP1              | Mus musculus aquaporin 1 (Aqp1), mRNA.                                                                     | NM_007472.1<br>NM_007472.1<br>NM_007472.2 | 3.36438<br>3.17094<br>2.68865 |   |
| FLRT2             | Mus musculus fibronectin leucine rich transmembrane protein 2 (Flrt2), mRNA.                               | NM_201518.1                               | 3.35539                       |   |
| CHST7             | Mus musculus carbohydrate (N-acetylglucosamino) sulfotransferase 7 (Chst7), mRNA.                          | NM_021715.1                               | 3.30149                       |   |
| SLC6A9            | Mus musculus solute carrier family 6 (neurotransmitter transporter, glycine), member 9 (Slc6a9), mRNA.     | NM_008135.4                               | 3.29421                       |   |
| CTGF              | Mus musculus connective tissue growth factor (Ctgf), mRNA.                                                 | NM_010217.1                               | 3.29075                       | * |
| HIST1H4J          | Mus musculus histone cluster 1, H4j (Hist1h4j), mRNA.                                                      | NM_178210.1                               | 3.27048                       |   |
| HOXA7             | Mus musculus homeo box A7 (Hoxa7), mRNA.                                                                   | NM_010455.2                               | 3.26892                       |   |
| NUPR1             | Mus musculus nuclear protein 1 (Nupr1), mRNA.                                                              | NM_019738.1                               | 3.26419                       |   |
| EPHA3             | Mus musculus Eph receptor A3 (Epha3), mRNA.                                                                | NM_010140.1<br>NM_010140.1                | 3.25155<br>2.30077            |   |
| SCMH1             | Mus musculus sex comb on midleg homolog 1 (Scmh1), mRNA.                                                   | NM_013883.1                               | 3.21681                       |   |
| SNCG              | Mus musculus synuclein, gamma (Sncg), mRNA.                                                                | NM_011430.2                               | 3.17605                       |   |
| RIN1              | Mus musculus Ras and Rab interactor 1 (Rin1), mRNA.                                                        | NM_145495.2                               | 3.16499                       |   |
| ATF5              | Mus musculus activating transcription factor 5 (Atf5), mRNA.                                               | NM_030693.1                               | 3.16417                       |   |
| COL7A1            | Mus musculus collagen, type VII, alpha 1 (Col7a1), mRNA.                                                   | NM_007738.3                               | 3.12923                       | * |
| CCNG1             | Mus musculus cyclin G1 (Ccng1), mRNA.                                                                      | NM_009831.2<br>NM_009831.2<br>NM_009831.2 | 3.10906<br>2.3024<br>2.06394  | * |
| PDE4DIP           | Mus musculus phosphodiesterase 4D interacting protein (myomegalin) (Pde4dip), transcript variant 1, mRNA.  | NM_001039376.1                            | 3.09392                       |   |

|                   |                                                                                                                              |                                                          |                                          |   |
|-------------------|------------------------------------------------------------------------------------------------------------------------------|----------------------------------------------------------|------------------------------------------|---|
| MOD1              | PREDICTED: Mus musculus similar to Mod1 protein, transcript variant 4 (LOC677317), mRNA.                                     | XM_001004685.1                                           | 3.08651                                  |   |
| DPP7              | Mus musculus dipeptidylpeptidase 7 (Dpp7), mRNA.                                                                             | NM_031843.2                                              | 3.06014                                  |   |
| PFN2              | Mus musculus profilin 2 (Pfn2), mRNA.                                                                                        | NM_019410.2<br>NM_019410.2                               | 3.05198<br>2.75215                       |   |
| CCND1             | Mus musculus cyclin D1 (Ccnd1), mRNA.                                                                                        | NM_007631.2<br>NM_007631.1<br>NM_007631.1                | 3.04646<br>2.63953<br>2.55278            |   |
| PKIA              | Mus musculus protein kinase inhibitor, alpha (Pkia), mRNA.                                                                   | NM_008862.3                                              | 3.04401                                  |   |
| CD109             | Mus musculus CD109 antigen (Cd109), mRNA.                                                                                    | NM_153098.2<br>NM_153098.2                               | 3.02402<br>2.37338                       |   |
| FBXO25            | Mus musculus F-box protein 25 (Fbxo25), mRNA.                                                                                | NM_025785.2                                              | 3.01954                                  |   |
| CKLFSF4           | Mus musculus CKLF-like MARVEL transmembrane domain containing 4 (Cmtm4), mRNA.                                               | NM_153582.4                                              | 3.01163                                  |   |
| RNU6              | Mus musculus U6 small nuclear RNA (Rnu6), non-coding RNA.                                                                    | NR_003027.1                                              | 2.9508                                   |   |
| ELMO2             | Mus musculus engulfment and cell motility 2, ced-12 homolog (C. elegans) (Elmo2), transcript variant 3, mRNA.                | NM_080287.2                                              | 2.94356                                  |   |
| IRX2              | Mus musculus Iroquois related homeobox 2 (Drosophila) (Irx2), mRNA.                                                          | NM_010574.2                                              | 2.94042                                  |   |
| 1810045K06<br>RIK | Mus musculus kelch-like 21 (Drosophila) (Klhl21), mRNA.                                                                      | NM_001033352.3                                           | 2.93826                                  |   |
| ACOT7             | Mus musculus acyl-CoA thioesterase 7 (Acot7), mRNA.                                                                          | NM_133348.1<br>NM_133348.1<br>NM_133348.1<br>NM_133348.1 | 2.93403<br>2.57733<br>2.48516<br>2.43181 |   |
| PLA2G12A          | Mus musculus phospholipase A2, group X1A (Pla2g12a), transcript variant 1, mRNA.                                             | NM_023196.2                                              | 2.928                                    |   |
| EPHX1             | Mus musculus epoxide hydrolase 1, microsomal (Ephx1), mRNA.                                                                  | NM_010145.2                                              | 2.90728                                  | * |
| PTRH1             | Mus musculus peptidyl-tRNA hydrolase 1 homolog (S. cerevisiae) (Ptrh1), mRNA.                                                | NM_178595.3<br>NM_178595.2                               | 2.88622<br>2.74032                       |   |
| NPR2              | Mus musculus natriuretic peptide receptor 2 (Npr2), mRNA.                                                                    | NM_173788.3                                              | 2.87031                                  |   |
| MLLT11            | Mus musculus myeloid/lymphoid or mixed-lineage leukemia (trithorax homolog, Drosophila); translocated to, 11 (Mllt11), mRNA. | NM_019914.3                                              | 2.86807                                  |   |
| MOXD1             | Mus musculus monooxygenase, DBH-like 1 (Moxd1), mRNA.                                                                        | NM_021509.3                                              | 2.84276                                  |   |
| GDF15             | Mus musculus growth differentiation factor 15 (Gdf15), mRNA.                                                                 | NM_011819.1                                              | 2.84186                                  | * |
| HSP105            | Mus musculus heat shock protein 105 (Hsp105) mRNA.                                                                           | NM_013559.1                                              | 2.83632                                  |   |
| HIST1H2BM         | Mus musculus histone cluster 1, H2bm (Hist1h2bm), mRNA.                                                                      | NM_178200.1                                              | 2.82491                                  | * |
| MDM2              | Mus musculus transformed mouse 3T3 cell double minute 2 (Mdm2), mRNA.                                                        | NM_010786.2<br>NM_010786.3                               | 2.80901<br>2.71183                       | * |
| CCDC3             | Mus musculus coil-coiled domain containing 3 (Ccdc3) mRNA.                                                                   | XM_129987.2                                              | 2.78141                                  |   |
| ASS1              | Mus musculus argininosuccinate synthetase 1 (Ass1), mRNA.                                                                    | NM_007494.3                                              | 2.78125                                  | * |
| SQSTM1            | Mus musculus sequestosome 1 (Sqstm1), mRNA.                                                                                  | NM_011018.2                                              | 2.77037                                  |   |
| HIST1H2BJ         | Mus musculus histone cluster 1, H2bj (Hist1h2bj), mRNA.                                                                      | NM_178198.1                                              | 2.7552                                   | * |
| TESK1             | Mus musculus testis specific protein kinase 1 (Tek1), mRNA.                                                                  | NM_011571.2                                              | 2.75272                                  |   |
| ALDH3A1           | Mus musculus aldehyde dehydrogenase family 3, subfamily A1 (Aldh3a1), mRNA.                                                  | NM_007436.1                                              | 2.73391                                  | * |
| TRIB2             | Mus musculus Tribbles homolog 2 (Trib2) mRNA.                                                                                | NM_144551.3                                              | 2.72893                                  |   |
| ARHGEF18          | Mus musculus rho/rac guanine nucleotide exchange factor (GEF) 18 (Arhgef18), mRNA.                                           | NM_133962.3                                              | 2.72592                                  |   |
| KCTD10            | Mus musculus potassium channel tetramerisation domain containing 10 (Kctd10), mRNA.                                          | NM_026145.3                                              | 2.72172                                  | * |
| A1450948          | Mus musculus AHNAK nucleoprotein 2 (Ahnak2), mRNA.                                                                           | NM_001033476.1                                           | 2.71731                                  |   |
| FHL2              | Mus musculus four and a half LIM domains 2 (Fhl2), mRNA.                                                                     | NM_010212.3                                              | 2.70708                                  |   |
| ST3GAL3           | Mus musculus ST3 beta-galactoside alpha-2,3-sialyltransferase 3 (St3gal3), mRNA.                                             | NM_009176.2                                              | 2.70341                                  |   |
| HIST1H2BH         | Mus musculus histone cluster 1, H2bh (Hist1h2bh), mRNA.                                                                      | NM_178197.1                                              | 2.69357                                  | * |

|                   |                                                                                                    |                            |                    |   |
|-------------------|----------------------------------------------------------------------------------------------------|----------------------------|--------------------|---|
| STK38L            | Mus musculus serine/threonine kinase 38 like (Stk38l), mRNA.                                       | NM_172734.2                | 2.6934             |   |
| SDPR              | Mus musculus serum deprivation response (Sdpr), mRNA.                                              | NM_138741.1                | 2.68312            |   |
| PRELP             | Mus musculus proline arginine-rich end leucine-rich repeat (Prelp), mRNA.                          | NM_054077.3                | 2.68243            | * |
| LMCD1             | Mus musculus LIM and cysteine-rich domains 1 (Lmcd1), mRNA.                                        | NM_144799.1<br>NM_144799.1 | 2.67584<br>2.56154 |   |
| CATNAL1           | Mus musculus catenin (cadherin associated protein), alpha-like 1 (Ctnnal1), mRNA.                  | NM_018761.2                | 2.67576            |   |
| AU040829          | Mus musculus expressed sequence AU040829 (AU040829), transcript variant 2, mRNA.                   | NM_175003.3                | 2.67252            |   |
| GSTP1             | Mus musculus glutathione S-transferase, pi 1 (Gstp1), mRNA.                                        | NM_013541.1<br>NM_013541.1 | 2.67226<br>2.47776 | * |
| HIST1H2BK         | Mus musculus histone cluster 1, H2bk (Hist1h2bk), mRNA.                                            | NM_175665.1                | 2.6699             | * |
| PDGFA             | Mus musculus platelet-derived growth factor, A polypeptide (Pdgfa), mRNA.                          |                            | 2.63164            | * |
| BC022687          | Mus musculus cDNA sequence BC022687 (BC022687), mRNA.                                              | NM_145450.3                | 2.6233             |   |
| CHST1             | Mus musculus carbohydrate (keratan sulfate Gal-6) sulfotransferase 1 (Chst1), mRNA.                | NM_023850.1                | 2.61691            |   |
| PRKG2             | Mus musculus protein kinase, cGMP-dependent, type II (Prkg2), mRNA.                                | NM_008926.3                | 2.61221            |   |
| IL7               | Mus musculus interleukin 7 (Il7), mRNA.                                                            | NM_008371.4                | 2.60881            |   |
| EFNA5             | Mus musculus ephrin A5 (Efna5), transcript variant 2, mRNA.                                        | NM_010109.2                | 2.60209            |   |
| ASNS              | Mus musculus asparagine synthetase (Asns), mRNA.                                                   | NM_012055.3<br>NM_012055.1 | 2.60203<br>2.34067 |   |
| LRP11             | Mus musculus low density lipoprotein receptor-related protein 11 (Lrp11), mRNA.                    | NM_172784.2                | 2.59931            |   |
| E2F6              | Mus musculus E2F transcription factor 6 (E2f6), mRNA.                                              | NM_033270.1<br>NM_033270.1 | 2.59526<br>2.18826 |   |
| SULF1             | Mus musculus sulfatase 1 (Sulf1), mRNA.                                                            | NM_172294.1                | 2.58389            |   |
| DDEF1             | PREDICTED: Mus musculus similar to Development and differentiation enhancing (LOC100045359), mRNA. | XM_001474179.1             | 2.581              |   |
| AVP1              | Mus musculus arginine vasopressin-induced 1 (Avp1), mRNA.                                          | NM_027106.3                | 2.56632            |   |
| D10ERTD214<br>E   | Mus musculus CDGSH iron sulfur domain 1 (Cisd1), mRNA.                                             | NM_134007.4                | 2.56526            |   |
| HIST1H2BF         | Mus musculus histone cluster 1, H2bf (Hist1h2bf), mRNA.                                            | NM_178195.1                | 2.55937            | * |
| 2010323F13<br>RIK | Mus musculus GTP cyclohydrolase I feedback regulator (Gchfr), mRNA.                                | NM_177157.4                | 2.55781            |   |
| C85492            | Mus musculus expressed sequence C85492 (C85492), mRNA.                                             | NM_153540.3                | 2.55722            |   |
| GNB4              | Mus musculus guanine nucleotide binding protein (G protein), beta 4 (Gnb4), mRNA.                  | NM_013531.3                | 2.55171            |   |
| ENPP5             | Mus musculus ectonucleotide pyrophosphatase/phosphodiesterase 5 (Enpp5), mRNA.                     | NM_032003.1                | 2.53694            |   |
| IRS2              | Mus musculus insulin receptor substrate 2 (Irs2), mRNA.                                            | NM_001081212.1             | 2.53676            |   |
| HIST1H2BE         | Mus musculus histone cluster 1, H2be (Hist1h2be), mRNA.                                            | NM_178194.3                | 2.53288            |   |
| PDGFC             | Mus musculus platelet-derived growth factor, C polypeptide (Pdgfc), mRNA.                          | NM_019971.2                | 2.51907            |   |
| DDC8              | Mus musculus testis specific protein, Ddc8 (Ddc8), mRNA.                                           | NM_021440.1                | 2.51858            |   |
| LIMK2             | Mus musculus LIM motif-containing protein kinase 2 (Limk2), transcript variant 3, mRNA.            | NM_001034030.1             | 2.5175             |   |
| AHRR              | Mus musculus aryl-hydrocarbon receptor repressor (Ahrr), mRNA.                                     | NM_009644.2                | 2.51242            | * |
| PHGDH             | Mus musculus 3-phosphoglycerate dehydrogenase (Phgdh), mRNA.                                       | NM_016966.3                | 2.50713            |   |
| 4933428A15<br>RIK | Mus musculus microfibillar-associated protein 3-like (Mfap3l), mRNA.                               | NM_027756.3                | 2.50027            |   |
| MEGF10            | Mus musculus multiple EGF-like-domains 10 (Megf10), mRNA.                                          | NM_001001979.1             | 2.49787            |   |
| BTEB1             | Mus musculus Kruppel-like factor 9 (Klf9), mRNA.                                                   | NM_010638.4                | 2.49532            |   |
| DDIT3             | Mus musculus DNA-damage inducible transcript 3 (Ddit3), mRNA.                                      | NM_007837.2<br>NM_007837.2 | 2.49149<br>2.42554 |   |

|               |                                                                                                                                |                                  |                    |   |
|---------------|--------------------------------------------------------------------------------------------------------------------------------|----------------------------------|--------------------|---|
| TMBIM1        | Mus musculus transmembrane BAX inhibitor motif containing 1 (Tmbim1), mRNA.                                                    | NM_027154.3                      | 2.47126            |   |
| CSPG4         | Mus musculus chondroitin sulfate proteoglycan 4 (Cspg4), mRNA.                                                                 | NM_139001.2                      | 2.47001            |   |
| ANXA3         | Mus musculus annexin A3 (Anxa3), mRNA.                                                                                         | NM_013470.1<br>NM_013470.1       | 2.46116<br>2.43753 |   |
| D2BWG0891E    | Mus musculus dysbindin (dystrobrevin binding protein 1) domain containing 2 (Dbndd2), transcript variant 3, mRNA.              | NM_001048228.1                   | 2.45135            |   |
| COQ10B        | Mus musculus coenzyme Q10 homolog B (S. cerevisiae) (Coq10b), transcript variant 1, mRNA.                                      | NM_001039710.1<br>NM_001039710.1 | 2.45009<br>2.0111  |   |
| PRLR          | Mus musculus prolactin receptor (Prlr), mRNA.                                                                                  | NM_011169.4                      | 2.43943            |   |
| FOXG1         | Mus musculus forkhead box G1 (Foxg1), mRNA.                                                                                    | NM_008241.1                      | 2.43518            |   |
| SLC19A2       | Mus musculus solute carrier family 19 (thiamine transporter), member 2 (Slc19a2), mRNA.                                        | NM_054087.2                      | 2.43174            |   |
| CIB2          | Mus musculus calcium and integrin binding family member 2 (Cib2), mRNA.                                                        | NM_019686.3                      | 2.42973            |   |
| HSPB8         | Mus musculus heat shock protein 8 (Hspb8), mRNA.                                                                               | NM_030704.1                      | 2.42948            | * |
| PDK4          | Mus musculus pyruvate dehydrogenase kinase, isoenzyme 4 (Pdk4), mRNA.                                                          | NM_013743.2                      | 2.42519            |   |
| CAR11         | Mus musculus carbonic anhydrase 11 (Car11), mRNA.                                                                              | NM_009800.2                      | 2.42404            |   |
| SLC20A2       | PREDICTED: Mus musculus hypothetical protein LOC100045882 (LOC100045882), mRNA.                                                | XM_001475083.1                   | 2.40661            |   |
| 2310046G15RIK | Mus musculus protease, serine, 23 (Prss23), mRNA.                                                                              | NM_029614.3                      | 2.40484            |   |
| THBD          | Mus musculus thrombomodulin (Thbd), mRNA.                                                                                      | NM_009378.2                      | 2.39873            |   |
| HIST1H2BN     | Mus musculus histone cluster 1, H2bn (Hist1h2bn), mRNA.                                                                        | NM_178201.1                      | 2.39622            |   |
| 1600002K03RIK | Mus musculus RIKEN cDNA 1600002K03 gene (1600002K03Rik), mRNA.                                                                 | NM_027207.1                      | 2.39613            |   |
| SULT4A1       | Mus musculus sulfotransferase family 4A, member 1 (Sult4a1), mRNA.                                                             | NM_013873.3                      | 2.38797            |   |
| 9030611O19RIK | Mus musculus family with sequence similarity 110, member C (Fam110c), mRNA.                                                    | NM_027828.2                      | 2.37875            |   |
| NGFB          | Mus musculus nerve growth factor, beta (Ngfb), mRNA.                                                                           | NM_013609.1                      | 2.37565            |   |
| HIST1H4I      | Mus musculus histone cluster 1, H4i (Hist1h4i), mRNA.                                                                          | NM_175656.2                      | 2.37374            |   |
| HIST1H4K      | Mus musculus histone cluster 1, H4k (Hist1h4k), mRNA.                                                                          | NM_178211.1                      | 2.3728             |   |
| SGK           | Mus musculus serum/glucocorticoid regulated kinase 1 (Sgk1), mRNA.                                                             | NM_011361.1                      | 2.36214            | * |
| ANGPTL2       | Mus musculus angiopoietin-like 2 (Angptl2), mRNA.                                                                              | NM_011923.4                      | 2.35841            |   |
| SLC9A3R2      | Mus musculus solute carrier family 9 (sodium/hydrogen exchanger), member 3 regulator 2 (Slc9a3r2), transcript variant A, mRNA. | NM_023055.1                      | 2.35753            |   |
| SAMD4         | Mus musculus sterile alpha motif domain containing 4 (Samd4), transcript variant 1, mRNA.                                      | NM_001037221.1                   | 2.35603            |   |
| NRN1          | Mus musculus neuritin 1 (Nrn1), mRNA.                                                                                          | NM_153529.1                      | 2.35489            |   |
| HIST1H3E      | Mus musculus histone cluster 1, H3e (Hist1h3e), mRNA.                                                                          | NM_178205.1                      | 2.34212            |   |
| DP1           | Mus musculus receptor accessory protein 5 (Reep5), mRNA.                                                                       | NM_007874.2                      | 2.3364             |   |
| 1700024K14RIK | Mus musculus CAP-GLY domain containing linker protein family, member 4 (Clip4), mRNA.                                          | NM_030179.2                      | 2.33421            |   |
| WHRN          | Mus musculus whirlin (Whrn), transcript variant 3, mRNA.                                                                       | NM_001008792.1                   | 2.3278             | * |
| LOR           | Mus musculus lorricrin (Lor), mRNA.                                                                                            | NM_008508.2                      | 2.32305            |   |
| CD9           | Mus musculus tetraspanning glycoprotein 9 (Cd9) mRNA                                                                           | NM_007657.2                      | 2.32166            |   |
| 1700047117RIK | Mus musculus RIKEN cDNA 1700047117 gene 1 (1700047117Rik1), mRNA.                                                              | NM_028527.1                      | 2.31688            |   |
| HES1          | Mus musculus hairy and enhancer of split 1 (Drosophila) (Hes1), mRNA.                                                          | NM_008235.2                      | 2.31173            |   |
| SNX7          | Mus musculus sorting nexin 7 (Snx7), mRNA.                                                                                     | NM_029655.2                      | 2.31142            |   |
| CKLFSF4       | Mus musculus CKLF-like MARVEL transmembrane domain containing 4 (Cmtm4), mRNA.                                                 | NM_153582.4                      | 2.3065             |   |
| CBR2          | Mus musculus carbonyl reductase 2 (Cbr2), mRNA.                                                                                | NM_007621.1                      | 2.30116            |   |

|                   |                                                                                                                  |                            |                              |   |
|-------------------|------------------------------------------------------------------------------------------------------------------|----------------------------|------------------------------|---|
| HIST1H3D          | Mus musculus histone cluster 1, H3d (Hist1h3d), mRNA.                                                            | NM_178204.1                | 2.29977                      |   |
| EEF1A2            | Mus musculus eukaryotic translation elongation factor 1 alpha 2 (Eef1a2), mRNA.                                  | NM_007906.2                | 2.29317                      | * |
| D8ERTD594E        | Mus musculus WW, C2 and coiled-coil domain containing 2 (Wwc2), mRNA.                                            | NM_133791.4                | 2.29045                      |   |
| C630013N10<br>RIK | Mus musculus kelch-like 26 (Drosophila) (Klhl26), transcript variant 1, mRNA.                                    | NM_172052.1                | 2.28996                      |   |
| DAB2IP            | Mus musculus disabled homolog 2 (Drosophila) interacting protein (Dab2ip), mRNA.                                 | NM_001001602.1             | 2.27987                      |   |
| MRPL38            | Mus musculus mitochondrial ribosomal protein L38 (Mrpl38), nuclear gene encoding mitochondrial protein, mRNA.    | NM_024177.3                | 2.27595                      |   |
| HIST1H4M          | Mus musculus histone cluster 1, H4m (Hist1h4m), mRNA.                                                            | NM_175657.1                | 2.27071                      |   |
| PBP2              | Mus musculus phosphatidylethanolamine binding protein 2 (Pbp2), mRNA.                                            | NM_029595.3                | 2.26699                      |   |
| CDO1              | Mus musculus cysteine dioxygenase 1, cytosolic (Cdo1), mRNA.                                                     | NM_033037.3                | 2.25818                      |   |
| KCNK2             | Mus musculus potassium channel, subfamily K, member 2 (Kcnk2), mRNA.                                             | NM_010607.1                | 2.25607                      |   |
| IDH3A             | Mus musculus isocitrate dehydrogenase 3 (NAD+) alpha (ldh3a), nuclear gene encoding mitochondrial protein, mRNA. | NM_029573.2                | 2.24384                      |   |
| PMM1              | Mus musculus phosphomannomutase 1 (Pmm1), mRNA.                                                                  | NM_013872.1<br>NM_013872.2 | 2.24368<br>2.0541            |   |
| SLCO3A1           | Mus musculus solute carrier organic anion transporter family, member 3a1 (Slco3a1), transcript variant 1, mRNA.  | NM_023908.2                | 2.24125                      |   |
| B230104P22<br>RIK | Mus musculus NUAK family, SNF1-like kinase, 1 (Nuak1), mRNA.                                                     | NM_001004363.1             | 2.23653                      |   |
| NGFB              | Mus musculus nerve growth factor, beta (Ngfb), mRNA.                                                             | NM_013609.1                | 2.22787                      |   |
| 2610204M08<br>RIK | Mus musculus RIKEN cDNA 2610204M08 gene (2610204M08Rik), mRNA.                                                   | NM_198411.2                | 2.21893                      |   |
| HOXC6             | Mus musculus homeo box C6 (Hoxc6), mRNA.                                                                         | NM_010465.2                | 2.21521                      | * |
| NBL1              | Mus musculus neuroblastoma, suppression of tumorigenicity 1 (Nbl1), mRNA.                                        | NM_008675.1                | 2.21447                      | * |
| CD151             | Mus musculus transmembrane-4 protein (Cd151) mRNA                                                                | NM_009842.1                | 2.21371<br>2.16579<br>2.1459 |   |
| 2300002D11<br>RIK | Mus musculus RIKEN cDNA 2300002D11 gene (2300002D11Rik), mRNA.                                                   | NM_001081156.2             | 2.21367                      | * |
| D5BWG0834<br>E    | Mus musculus coiled-coil domain containing 92 (Ccdc92), mRNA.                                                    | NM_144819.2                | 2.20015                      |   |
| GTSE1             | Mus musculus G two S phase expressed protein 1 (Gtse1), mRNA.                                                    | NM_013882.1                | 2.19507                      |   |
| HMGA1             | Mus musculus high mobility group AT-hook 1 (Hmga1), transcript variant 1, mRNA.                                  | NM_016660.2                | 2.19481                      |   |
| RNF11             | Mus musculus ring finger protein 11 (Rnf11), mRNA.                                                               | NM_013876.3<br>NM_013876.2 | 2.19088<br>2.13822           |   |
| GDF10             | Mus musculus growth differentiation factor 10 (Gdf10), mRNA.                                                     | NM_145741.2                | 2.19078                      |   |
| SERPINE2          | Mus musculus serine (or cysteine) peptidase inhibitor, clade E, member 2 (Serpine2), mRNA.                       | NM_009255.2                | 2.18924                      |   |
| TLCD1             | Mus musculus TLC domain containing 1 (Tlcd1), mRNA.                                                              | NM_026708.1                | 2.18619                      |   |
| 1810059A23<br>RIK | Mus musculus MTERF domain containing 2 (Mterfd2), mRNA.                                                          | NM_178051.3                | 2.17992                      |   |
| CYB5R3            | Mus musculus cytochrome b5 reductase 3 (Cyb5r3), mRNA.                                                           | NM_029787.2                | 2.17454                      |   |
| CDKN1A            | Mus musculus cyclin-dependent kinase inhibitor 1A (P21) (Cdkn1a), mRNA.                                          | NM_007669.2<br>NM_007669.2 | 2.17063<br>2.03977           |   |
| D930001I22R<br>IK | Mus musculus RIKEN cDNA D930001I22 gene (D930001I22Rik), mRNA.                                                   | NM_173397.2                | 2.16768                      |   |
| TTL11             | Mus musculus tubulin tyrosine ligase-like family, member 11 (Ttl11), mRNA.                                       | NM_028921.1                | 2.16575                      |   |
| THSD6             | Mus musculus ADAMTS-like 5 (Adamtsl5), transcript variant 2, mRNA.                                               | NM_025629.2                | 2.16529                      |   |
| 9130213B05<br>RIK | Mus musculus RIKEN cDNA 9130213B05 gene (9130213B05Rik), mRNA.                                                   | NM_145562.2                | 2.16525                      |   |
| CLN2              | Mus musculus tripeptidyl peptidase I (Tpp1), mRNA.                                                               | NM_009906.4                | 2.16468                      |   |
| BC046404          | Mus musculus cDNA sequence BC046404 (BC046404), mRNA.                                                            | NM_198861.1                | 2.16108                      |   |

|                |                                                                                                                 |                            |                    |  |
|----------------|-----------------------------------------------------------------------------------------------------------------|----------------------------|--------------------|--|
| EPN2           | Mus musculus epsin 2 (Epn2), mRNA.                                                                              | NM_010148.2                | 2.15494            |  |
| IGFBP2         | Mus musculus insulin-like growth factor binding protein 2 (Igfbp2), mRNA.                                       | NM_008342.2                | 2.14973            |  |
| BTBD11         | Mus musculus BTB (POZ) domain containing 11 (Btbd11), transcript variant 2, mRNA.                               | NM_001017525.1             | 2.13589            |  |
| CD80           | Mus musculus CD80 antigen (Cd80), mRNA.                                                                         | NM_009855.2                | 2.13447            |  |
| SLC5A7         | Mus musculus solute carrier family 5 (choline transporter), member 7 (Slc5a7), mRNA.                            | NM_022025.3                | 2.13317            |  |
| SPNB2          | Mus musculus spectrin beta 2 (Spnb2), transcript variant 1, mRNA.                                               | NM_175836.2                | 2.13016            |  |
| C85492         | Mus musculus expressed sequence C85492 (C85492), mRNA.                                                          | NM_153540.3                | 2.1278             |  |
| CDKN2A         | Mus musculus cyclin-dependent kinase inhibitor 2A (Cdkn2a), transcript variant 1, mRNA.                         | NM_009877.2                | 2.12587            |  |
| AKT3           | Mus musculus thymoma viral proto-oncogene 3 (Akt3), mRNA.                                                       | NM_011785.2                | 2.12536            |  |
| MOD1           | Mus musculus malic enzyme, supernatant (Mod1), mRNA.                                                            | NM_008615.1                | 2.12224            |  |
| OSBPL3         | Mus musculus oxysterol binding protein-like 3 (Osbp13), mRNA.                                                   | NM_027881.1                | 2.12214            |  |
| LRRC28         | Mus musculus leucine rich repeat containing 28 (Lrrc28), mRNA.                                                  | NM_175124.4                | 2.12175            |  |
| RUSC2          | Mus musculus RUN and SH3 domain containing 2 (Rusc2), transcript variant 1, mRNA.                               | NM_199057.2<br>NM_199057.2 | 2.12044<br>2.07967 |  |
| PPM1F          | Mus musculus protein phosphatase 1F (PP2C domain containing) (Ppm1f), mRNA.                                     | NM_176833.3                | 2.11857            |  |
| TWIST2         | Mus musculus Twist family gene 2 (Twist2) mRNA                                                                  | NM_007855.1                | 2.11724            |  |
| OLFM1          | Mus musculus olfactomedin 1 (Olfm1), transcript variant 2, mRNA.                                                | NM_001038612.1             | 2.11547            |  |
| RGS4           | Mus musculus regulator of G-protein signaling 4 (Rgs4), mRNA.                                                   | NM_009062.3                | 2.11307            |  |
| BC046404       | PREDICTED: Mus musculus similar to CDNA sequence BC046404 (LOC100045343), misc RNA.                             | XR_031575.1                | 2.11236            |  |
| POLK           | Mus musculus polymerase (DNA directed), kappa (Polk), mRNA.                                                     | NM_012048.2                | 2.11149            |  |
| HIST1H2BC      | Mus musculus histone cluster 1, H2bc (Hist1h2bc), mRNA.                                                         | NM_023422.3                | 2.11057            |  |
| SKP1A          | Mus musculus S-phase kinase-associated protein 1A (Skp1a), mRNA.                                                | NM_011543.3                | 2.10718            |  |
| C530043G21 RIK | Mus musculus family with sequence similarity 20, member B (Fam20b), mRNA.                                       | NM_145413.4                | 2.10425            |  |
| CAV1           | Mus musculus caveolin 1, caveolae protein (Cav1), mRNA.                                                         | NM_007616.3                | 2.1                |  |
| DOK1           | Mus musculus docking protein 1 (Dok1), mRNA.                                                                    | NM_010070.3<br>NM_010070.3 | 2.0981<br>2.00769  |  |
| ANXA1          | Mus musculus annexin A1 (Anxa1), mRNA.                                                                          | NM_010730.2                | 2.09796            |  |
| LRRFIP1        | Mus musculus leucine rich repeat (in FLII) interacting protein 1 (Lrrfip1), mRNA.                               | NM_008515.1                | 2.09756            |  |
| 3222401M22 RIK | Mus musculus raftlin family member 2 (Rftn2), mRNA. XM_920263 XM_986521 XM_986556 XM_986596 XM_986637 XM_986673 | NM_028713.1                | 2.09728            |  |
| GATA2          | Mus musculus GATA binding protein 2 (Gata2), mRNA.                                                              | NM_008090.4                | 2.09705            |  |
| USP20          | Mus musculus ubiquitin specific peptidase 20 (Usp20), mRNA.                                                     | NM_028846.3                | 2.09632            |  |
| ITGB5          | Mus musculus integrin beta 5 (Itgb5), mRNA.                                                                     | NM_010580.1                | 2.09482            |  |
| 0610031J06R IK | Mus musculus RIKEN cDNA 0610031J06 gene (0610031J06Rik), mRNA.                                                  | NM_020003.1                | 2.09432            |  |
| GRASP          | Mus musculus general receptor for phosphoinositides-associated scaffold protein (Grasp) mRNA                    | NM_019518.2                | 2.09076            |  |
| TMEM119        | Mus musculus transmembrane protein 119 (Tmem119), mRNA.                                                         | NM_146162.1                | 2.08626            |  |
| 1810046J19R IK | Mus musculus RIKEN cDNA 1810046J19 gene (1810046J19Rik), mRNA.                                                  | NM_025559.2                | 2.08391            |  |
| ENO2           | Mus musculus enolase 2, gamma neuronal (Eno2), mRNA.                                                            | NM_013509.2                | 2.07747            |  |
| GSS            | Mus musculus glutathione synthetase (Gss), mRNA.                                                                | NM_008180.1                | 2.07467            |  |
| D330024H06 RIK | Mus musculus KN motif and ankyrin repeat domains 1 (Kank1), mRNA.                                               | NM_181404.5                | 2.0705             |  |
| AXL            | Mus musculus AXL receptor tyrosine kinase (Axl), mRNA.                                                          | NM_009465.3                | 2.06773            |  |

|                   |                                                                                                                                                                                                     |                |         |  |
|-------------------|-----------------------------------------------------------------------------------------------------------------------------------------------------------------------------------------------------|----------------|---------|--|
| PTGS1             | Mus musculus prostaglandin-endoperoxide synthase 1 (Ptgs1), mRNA.                                                                                                                                   | NM_008969.3    | 2.06488 |  |
| RFTN2             | Mus musculus raftlin family member 2 (Rftn2), mRNA. XM_920263<br>XM_986521 XM_986556 XM_986596 XM_986637 XM_986673                                                                                  | NM_028713.1    | 2.06413 |  |
| 0610006K04<br>RIK | Mus musculus nudix (nucleoside diphosphate linked moiety X)-type motif 22 (Nudt22), mRNA.                                                                                                           | NM_026675.2    | 2.06218 |  |
| HYAL1             | Mus musculus hyaluronoglucosaminidase 1 (Hyal1), mRNA.                                                                                                                                              | NM_008317.4    | 2.05647 |  |
| TLE1              | Mus musculus transducin-like enhancer of split 1, homolog of Drosophila E(spl) (Tle1), mRNA. XM_984202 XM_984240 XM_984277 XM_984316<br>XM_984359 XM_984397 XM_984426 XM_984456 XM_984492 XM_984530 | NM_011599.3    | 2.05144 |  |
| HAGH              | Mus musculus hydroxyacyl glutathione hydrolase (Hagh), mRNA.                                                                                                                                        | NM_024284.1    | 2.04763 |  |
| D7ERTD156E        | Mus musculus nodal modulator 1 (Nomo1), mRNA.                                                                                                                                                       | NM_153057.3    | 2.04593 |  |
| 2900046G09<br>RIK | Mus musculus family with sequence similarity 131, member A (Fam131a), mRNA.                                                                                                                         | NM_133778.2    | 2.04532 |  |
| 2610001E17<br>RIK | Mus musculus coiled-coil domain containing 80 (Ccdc80), mRNA.                                                                                                                                       | NM_026439.2    | 2.04149 |  |
| HIST1H4F          | Mus musculus histone cluster 1, H4f (Hist1h4f), mRNA.                                                                                                                                               | NM_175655.1    | 2.04141 |  |
| 0610007H07<br>RIK | Mus musculus transmembrane BAX inhibitor motif containing 4 (Tmbim4), mRNA.                                                                                                                         | NM_026617.3    | 2.03485 |  |
| MGST3             | Mus musculus microsomal glutathione S-transferase 3 (Mgst3), mRNA.                                                                                                                                  | NM_025569.1    | 2.02646 |  |
| 6330505N24<br>RIK | Mus musculus RIKEN cDNA 6330505N24 gene (6330505N24Rik), mRNA.                                                                                                                                      | NM_001033301.2 | 2.02597 |  |
| 2310066E14<br>RIK | Mus musculus RIKEN cDNA 2310066E14 gene (2310066E14Rik), mRNA.                                                                                                                                      | NM_001081241.2 | 2.02182 |  |
| RAB3B             | Mus musculus member RAS oncogene family RIKEN-rab3b (Rab3b) mRNA.                                                                                                                                   | NM_023537.4    | 2.02047 |  |
| DCI               | Mus musculus dodecenoyl-Coenzyme A delta isomerase (3,2 trans-enoyl-Coenzyme A isomerase) (Dci), nuclear gene encoding mitochondrial protein, mRNA.                                                 | NM_010023.3    | 2.01962 |  |
| 0610031J06R<br>IK | Mus musculus RIKEN cDNA 0610031J06 gene (0610031J06Rik), mRNA.                                                                                                                                      | NM_020003.1    | 2.01776 |  |
| GSTA1             | Mus musculus glutathione S-transferase, alpha 1 (Ya) (Gsta1), mRNA.                                                                                                                                 | NM_008181.2    | 2.01709 |  |
| HBS1L             | Mus musculus Hbs1-like ( <i>S. cerevisiae</i> ) (Hbs1l), transcript variant 1, mRNA.                                                                                                                | NM_019702.2    | 2.01706 |  |
| TRP53INP2         | Mus musculus transformation related protein 53 inducible nuclear protein 2 (Trp53inp2), mRNA.                                                                                                       | NM_178111.3    | 2.01696 |  |
| S100A4            | Mus musculus S100 calcium binding protein A4 (S100a4), mRNA.                                                                                                                                        | NM_011311.1    | 2.01615 |  |
| 1500003O03<br>RIK | PREDICTED: Mus musculus similar to EF-hand Ca <sup>2+</sup> binding protein p22 (LOC100048622), mRNA.                                                                                               | XM_001480443.1 | 2.01556 |  |
| IDB1              | Mus musculus inhibitor of DNA binding 1 (Id1), mRNA.                                                                                                                                                | NM_010495.2    | 2.01443 |  |
| ASAH1             | Mus musculus N-acylsphingosine amidohydrolase 1 (Asah1), mRNA.                                                                                                                                      | NM_019734.1    | 2.01175 |  |

**S3 B Table: Genes (493) downregulated by *Pthrp* ablation (at 1g) (fold change < 0.5, p < 0.05)**

| Target ID | Definition (all probes : <i>Mus musculus</i> )                                          | RefSeq ID                  | Fold change        | Down regulated by Og |
|-----------|-----------------------------------------------------------------------------------------|----------------------------|--------------------|----------------------|
| LYZS      | Mus musculus lysozyme 2 (Lyz2), mRNA.                                                   | NM_017372.3<br>NM_017372.2 | 0.00777<br>0.0279  |                      |
| LAPTM5    | Mus musculus lysosomal-associated protein transmembrane 5 (Laptm5), mRNA.               | NM_010686.3                | 0.01087            |                      |
| FCER1G    | Mus musculus high affinity immunoglobulin epsilon receptor gamma subunit (Fcer1g) mRNA. | NM_010185.2                | 0.01636            | *                    |
| LYZ       | Mus musculus lysozyme (Lyz), mRNA.                                                      | NM_013590.2<br>NM_013590.3 | 0.02094<br>0.38513 | *                    |
| C1QB      | Mus musculus complement component 1, q subcomponent, beta polypeptide (C1qb), mRNA.     | NM_009777.2                | 0.02453            | *                    |
| IGF2      | Mus musculus insulin-like growth factor 2 (Igf2), mRNA.                                 | NM_010514.2                | 0.02611            | *                    |



|                   |                                                                                                                   |                                                          |                                          |   |
|-------------------|-------------------------------------------------------------------------------------------------------------------|----------------------------------------------------------|------------------------------------------|---|
| C1QG              | Mus musculus complement component 1, q subcomponent, C chain (C1qc), mRNA.                                        | NM_007574.2                                              | 0.03164                                  | * |
| ALOX5AP           | Mus musculus arachidonate 5-lipoxygenase activating protein (Alox5ap), mRNA.                                      | NM_009663.1                                              | 0.03171                                  | * |
| CLECSF8           | Mus musculus C-type lectin domain family 4, member d (Clec4d), mRNA.                                              | NM_010819.3                                              | 0.03345                                  |   |
| MS4A6D            | Mus musculus membrane-spanning 4-domains, subfamily A, member 6D (Ms4a6d), mRNA.                                  | NM_026835.2                                              | 0.03588                                  | * |
| H19               | Mus musculus H19 fetal liver mRNA (H19), non-coding RNA.                                                          | NR_001592.1                                              | 0.03605                                  | * |
| CCL4              | Mus musculus chemokine (C-C motif) ligand 4 (Ccl4), mRNA.                                                         | NM_013652.2                                              | 0.03678                                  |   |
| CCL9              | Mus musculus chemokine (C-C motif) ligand 9 (Ccl9), mRNA.                                                         | NM_011338.2                                              | 0.03902                                  |   |
| EMR1              | Mus musculus EGF-like module containing, mucin-like, hormone receptor-like sequence 1 (Emr1), mRNA.               | NM_010130.3<br>NM_010130.1<br>NM_010130.3                | 0.04523<br>0.1316<br>0.38638             | * |
| PTN               | Mus musculus pleiotrophin (Ptn), mRNA.                                                                            | NM_008973.2                                              | 0.04714                                  | * |
| MS4A7             | Mus musculus membrane-spanning 4-domains, subfamily A, member 7 (Ms4a7), transcript variant 1, mRNA.              | NM_027836.5                                              | 0.04969                                  |   |
| CD68              | Mus musculus CD68 antigen (Cd68), mRNA.                                                                           | NM_009853.1                                              | 0.05004                                  |   |
| TREM2             | Mus musculus triggering receptor expressed on myeloid cells 2 (Trem2), mRNA.                                      | NM_031254.2                                              | 0.05084                                  |   |
| DCN               | Mus musculus decorin (Dcn), mRNA.                                                                                 | NM_007833.4<br>NM_007833.4                               | 0.05486<br>0.06403                       | * |
| LPL               | Mus musculus lipoprotein lipase (Lpl), mRNA.                                                                      | NM_008509.2                                              | 0.05499                                  |   |
| HIST1H2AO         | Mus musculus histone cluster 1, H2ao (Hist1h2ao), mRNA.                                                           | NM_178185.1                                              | 0.05714                                  | * |
| LUM               | Mus musculus lumican (Lum), mRNA.                                                                                 | NM_008524.1                                              | 0.05734                                  | * |
| 2310061N23<br>RIK | Mus musculus interferon, alpha-inducible protein 27 (Ifi27), mRNA.                                                | NM_029803.1                                              | 0.05903                                  | * |
| HIST1H2AK         | Mus musculus histone cluster 1, H2ak (Hist1h2ak), mRNA.                                                           | NM_178183.1                                              | 0.05962                                  | * |
| CORO1A            | Mus musculus coronin, actin binding protein 1A (Coro1a), mRNA.                                                    | NM_009898.2<br>NM_009898.2<br>NM_009898.2<br>NM_009898.2 | 0.05965<br>0.08707<br>0.16968<br>0.38779 | * |
| HIST1H2AD         | Mus musculus histone cluster 1, H2ad (Hist1h2ad), mRNA.                                                           | NM_178188.3                                              | 0.06131                                  | * |
| CXCL1             | Mus musculus chemokine (C-X-C motif) ligand 1 (Cxcl1), mRNA.                                                      | NM_008176.1                                              | 0.06474                                  |   |
| HIST1H2AF         | Mus musculus histone cluster 1, H2af (Hist1h2af), mRNA.                                                           | NM_175661.1                                              | 0.06739                                  | * |
| PFC               | Mus musculus complement factor properdin (Cfp), mRNA.                                                             | NM_008823.3                                              | 0.07203                                  | * |
| CD52              | Mus musculus CD52 antigen (Cd52), mRNA.                                                                           | NM_013706.1                                              | 0.07493                                  | * |
| CTSC              | Mus musculus cathepsin C (Ctsc), mRNA.                                                                            | NM_009982.2<br>NM_009982.2<br>NM_009982.3                | 0.0758<br>0.18634<br>0.33872             | * |
| HIST1H2AH         | Mus musculus histone cluster 1, H2ah (Hist1h2ah), mRNA.                                                           | NM_175659.1                                              | 0.07772                                  | * |
| SERPINA3G         | Mus musculus serine (or cysteine) peptidase inhibitor, clade A, member 3G (Serpina3g), mRNA.                      | NM_009251.1                                              | 0.07795                                  |   |
| MYO1F             | Mus musculus myosin IF (Myo1f), mRNA.                                                                             | NM_053214.1                                              | 0.07882                                  |   |
| TGFBI             | Mus musculus transforming growth factor, beta induced (Tgfbi), mRNA.                                              | NM_009369.1<br>NM_009369.3                               | 0.07927<br>0.38979                       | * |
| CASP1             | Mus musculus caspase 1 (Casp1), mRNA.                                                                             | NM_009807.2                                              | 0.08006                                  |   |
| CENPA             | Mus musculus centromere protein A (Cenpa), mRNA.                                                                  | NM_007681.2                                              | 0.08088                                  | * |
| WBSCR5            | Mus musculus linker for activation of T cells family, member 2 (Lat2), transcript variant 2, mRNA.                | NM_022964.3                                              | 0.08091                                  |   |
| MRC1              | Mus musculus mannose receptor, C type 1 (Mrc1), mRNA.                                                             | NM_008625.1                                              | 0.0815                                   | * |
| HEMP1             | Mus musculus NCK associated protein 1 like (Nckap1), mRNA.                                                        | NM_153505.4                                              | 0.08261                                  | * |
| PRC1              | Mus musculus protein regulator of cytokinesis 1 (Prc1), mRNA.                                                     | NM_145150.1                                              | 0.08587                                  |   |
| SLC11A1           | Mus musculus solute carrier family 11 (proton-coupled divalent metal ion transporters), member 1 (Slc11a1), mRNA. | NM_013612.1<br>NM_013612.1<br>NM_013612.1<br>NM_013612.1 | 0.08799<br>0.10977<br>0.18128<br>0.33293 |   |

|                   |                                                                                                                                                                                                                                          |                                   |                    |   |
|-------------------|------------------------------------------------------------------------------------------------------------------------------------------------------------------------------------------------------------------------------------------|-----------------------------------|--------------------|---|
| E030006K04<br>RIK | Mus musculus centaurin, delta 3 (Centd3), mRNA.                                                                                                                                                                                          | NM_139206.1                       | 0.08861            |   |
| HIST1H2AN         | Mus musculus histone cluster 1, H2an (Hist1h2an), mRNA.                                                                                                                                                                                  | NM_178184.1                       | 0.09457            | * |
| SFRP2             | Mus musculus secreted frizzled-related protein 2 (Sfrp2), mRNA.                                                                                                                                                                          | NM_009144.1                       | 0.09652            | * |
| 1500015O10<br>RIK | Mus musculus RIKEN cDNA 1500015O10 gene (1500015O10Rik), mRNA.                                                                                                                                                                           | NM_024283.2                       | 0.09756            | * |
| MDK               | Mus musculus midkine (Mdk), transcript variant 3, mRNA.                                                                                                                                                                                  | NM_0010123<br>36.1<br>NM_010784.4 | 0.10108<br>0.20629 |   |
| COTL1             | Mus musculus coactosin-like 1 (Dictyostelium) (Cotl1), mRNA.                                                                                                                                                                             | NM_028071.1                       | 0.10111            |   |
| AOC3              | Mus musculus amine oxidase, copper containing 3 (Aoc3), mRNA.                                                                                                                                                                            | NM_009675.1                       | 0.10201            | * |
| RASSF4            | Mus musculus Ras association (RalGDS/AF-6) domain family member 4 (Rassf4), mRNA.                                                                                                                                                        | NM_178045.3<br>NM_178045.3        | 0.10287<br>0.1215  | * |
| LMO2              | Mus musculus LIM domain only 2 (Lmo2), mRNA.                                                                                                                                                                                             | NM_008505.3                       | 0.10409            |   |
| NCF4              | Mus musculus neutrophil cytosolic factor 4 (Ncf4), mRNA.                                                                                                                                                                                 | NM_008677.1                       | 0.10803            | * |
| TYROBP            | Mus musculus TYRO protein tyrosine kinase binding protein (Tyrobp), mRNA.                                                                                                                                                                | NM_011662.2                       | 0.10834            |   |
| FOS               | Mus musculus FBJ osteosarcoma oncogene (Fos), mRNA.                                                                                                                                                                                      | NM_010234.2                       | 0.11169            |   |
| CD14              | Mus musculus CD14 antigen (Cd14), mRNA.                                                                                                                                                                                                  | NM_009841.3                       | 0.11175            | * |
| CD84              | Mus musculus CD84 antigen (Cd84), mRNA.                                                                                                                                                                                                  | NM_013489.1                       | 0.11252            |   |
| IGF1              | Mus musculus insulin-like growth factor 1 (Igf1), transcript variant 1, mRNA.                                                                                                                                                            | NM_010512.3<br>NM_184052.2        | 0.11285<br>0.17522 |   |
| PTX3              | Mus musculus long pentraxin 3 (Ptx3) mRNA.                                                                                                                                                                                               | NM_008987.2<br>NM_008987.3        | 0.11368<br>0.14017 | * |
| OASL2             | Mus musculus 2'-5' oligoadenylate synthetase-like 2 (Oasl2), mRNA.                                                                                                                                                                       | NM_011854.1                       | 0.11594            | * |
| KCNAB2            | Mus musculus potassium voltage-gated channel, shaker-related subfamily, beta member 2 (Kcnab2), mRNA.                                                                                                                                    | NM_010598.2                       | 0.11799            | * |
| SLC1A3            | Mus musculus solute carrier family 1 (glial high affinity glutamate transporter), member 3 (Slc1a3), mRNA.                                                                                                                               | NM_148938.2                       | 0.11818            | * |
| ZRANB3            | Mus musculus zinc finger, RAN-binding domain containing 3 (Zranb3), mRNA.<br>XM_896419 XM_896436 XM_912948 XM_922552 XM_922558 XM_922565<br>XM_922581 XM_922587 XM_922596 XM_974893 XM_974926 XM_974968<br>XM_975006 XM_975040 XM_975084 | NM_027678.2                       | 0.12044            |   |
| NPY               | Mus musculus neuropeptide Y (Npy), mRNA.                                                                                                                                                                                                 | NM_023456.2                       | 0.12159            |   |
| LSP1              | PREDICTED: Mus musculus predicted gene, ENSMUSG00000043795 (ENSMUSG00000043795), mRNA.                                                                                                                                                   | XM_00148083<br>5.1                | 0.12439            | * |
| C3                | Mus musculus complement 3 (C3) mRNA.                                                                                                                                                                                                     | NM_009778.1                       | 0.12541            | * |
| SPON2             | Mus musculus spondin 2, extracellular matrix protein (Spon2), mRNA.                                                                                                                                                                      | NM_133903.2                       | 0.12584            |   |
| PYGL              | Mus musculus liver glycogen phosphorylase (Pygl), mRNA.                                                                                                                                                                                  | NM_133198.1<br>NM_133198.1        | 0.12663<br>0.35035 |   |
| EVI2A             | Mus musculus ecotropic viral integration site 2a (Evi2a), transcript variant 2, mRNA.                                                                                                                                                    | NM_010161.3<br>NM_010161.3        | 0.12808<br>0.43273 |   |
| SRPX              | Mus musculus sushi-repeat-containing protein (SrpX), mRNA.                                                                                                                                                                               | NM_016911.4<br>NM_016911.4        | 0.12828<br>0.14382 | * |
| E430025L02R<br>IK | Mus musculus leucine rich repeat containing 33 (Lrrc33), mRNA.                                                                                                                                                                           | NM_146069.4                       | 0.1296             |   |
| LPXN              | Mus musculus leupaxin (Lpxn), mRNA.                                                                                                                                                                                                      | NM_134152.3                       | 0.1316             |   |
| LILRB4            | Mus musculus leukocyte immunoglobulin-like receptor, subfamily B, member 4 (Lilrb4), mRNA.                                                                                                                                               | NM_013532.2                       | 0.13167            |   |
| MMP12             | Mus musculus matrix metalloproteinase 12 (Mmp12), mRNA.                                                                                                                                                                                  | NM_008605.3                       | 0.13191            |   |
| ARL11             | Mus musculus ADP-ribosylation factor-like 11 (Arl11), mRNA.                                                                                                                                                                              | NM_177337.3                       | 0.13262            |   |
| PSCDBP            | Mus musculus cytohesin 1 interacting protein (Cytip), mRNA.                                                                                                                                                                              | NM_139200.4                       | 0.13288            | * |
| SFRP1             | Mus musculus secreted frizzled-related sequence protein 1 (Sfrp1) mRNA.                                                                                                                                                                  | NM_013834.1                       | 0.13323            | * |
| DAB2              | Mus musculus disabled homolog 2 (Drosophila) (Dab2), transcript variant 2, mRNA.                                                                                                                                                         | NM_0010087<br>02.1<br>NM_023118.1 | 0.13411<br>0.17926 | * |

|                   |                                                                                                                                                           |                                           |                               |   |
|-------------------|-----------------------------------------------------------------------------------------------------------------------------------------------------------|-------------------------------------------|-------------------------------|---|
| ITM2A             | Mus musculus integral membrane protein 2A (Itm2a), mRNA.                                                                                                  | NM_008409.2                               | 0.13895                       | * |
| UHRF1             | Mus musculus ubiquitin-like, containing PHD and RING finger domains, 1 (Uhrf1), mRNA.                                                                     | NM_010931.2                               | 0.13962                       |   |
| DPEP2             | Mus musculus dipeptidase 2 (Dpep2), mRNA.                                                                                                                 | NM_176913.3                               | 0.14003<br>0.18665            | * |
| SCARA5            | Mus musculus scavenger receptor class A, member 5 (putative) (Scara5), mRNA.                                                                              | NM_028903.1                               | 0.14055                       | * |
| DLK1              | Mus musculus delta-like 1 homolog (Drosophila) (Dlk1), mRNA.                                                                                              | NM_010052.4                               | 0.15137                       | * |
| PTPNS1            | Mus musculus signal-regulatory protein alpha (Sirpa), mRNA.                                                                                               | NM_007547.2                               | 0.15282                       |   |
| MCM5              | Mus musculus minichromosome maintenance deficient 5, cell division cycle 46 (S. cerevisiae) (Mcm5), mRNA.                                                 | NM_008566.2                               | 0.15351                       |   |
| FCGR3             | Mus musculus Fc receptor, IgG, low affinity III (Fcgr3), mRNA.                                                                                            | NM_010188.4                               | 0.15699                       |   |
| EMB               | Mus musculus embigin (Emb), mRNA.                                                                                                                         | NM_010330.3                               | 0.15774                       |   |
| MS4A6D            | Mus musculus membrane-spanning 4-domains, subfamily A, member 6D (Ms4a6d), mRNA.                                                                          | NM_026835.2                               | 0.15781                       |   |
| OLFML2B           | Mus musculus olfactomedin-like 2B (Olfml2b), mRNA.                                                                                                        | NM_177068.3                               | 0.15971                       |   |
| 4930583H14<br>RIK | Mus musculus RIKEN cDNA 4930583H14 gene (4930583H14Rik), mRNA.                                                                                            | NM_026358.2                               | 0.16845                       | * |
| TUBB2B            | Mus musculus tubulin, beta 2b (Tubb2b), mRNA.                                                                                                             | NM_023716.2<br>NM_023716.1                | 0.17209<br>0.44793            |   |
| P2RY6             | Mus musculus pyrimidinergic receptor P2Y, G-protein coupled, 6 (P2ry6), mRNA.                                                                             | NM_183168.1                               | 0.17217                       |   |
| USP18             | Mus musculus ubiquitin specific peptidase 18 (Usp18), mRNA.<br>PREDICTED: Mus musculus similar to ubiquitin specific protease UBP43 (LOC100048346), mRNA. | NM_011909.1<br>M_001480051<br>.1          | 0.17303<br>0.25553            |   |
| TK1               | Mus musculus thymidine kinase 1 (Tk1), mRNA.                                                                                                              | NM_009387.1                               | 0.17424                       | * |
| APOD              | PREDICTED: Mus musculus similar to apolipoprotein D (LOC100047583), mRNA.                                                                                 | XM_00147913<br>8.1                        | 0.17425                       | * |
| OAS1G             | Mus musculus 2'-5' oligoadenylate synthetase 1G (Oas1g), mRNA.                                                                                            | NM_011852.2                               | 0.1746                        |   |
| POLR2G            | Mus musculus polymerase (RNA) II (DNA directed) polypeptide G (Polr2g), mRNA.                                                                             | NM_026329.2                               | 0.17533                       |   |
| VAV1              | Mus musculus vav 1 oncogene (Vav1), mRNA.                                                                                                                 | NM_011691.3                               | 0.17711                       |   |
| PPP1R3C           | Mus musculus protein phosphatase 1, regulatory (inhibitor) subunit 3C (Ppp1r3c), mRNA.                                                                    | NM_016854.2                               | 0.17777                       | * |
| CDCA3             | Mus musculus cell division cycle associated 3 (Cdca3), mRNA.                                                                                              | NM_013538.4                               | 0.1784                        |   |
| FOLR2             | Mus musculus folate receptor 2 (fetal) (Folr2), mRNA.                                                                                                     | NM_008035.1                               | 0.17841                       |   |
| CXCL16            | Mus musculus chemokine (C-X-C motif) ligand 16 (Cxcl16), mRNA.                                                                                            | NM_023158.6                               | 0.17918                       |   |
| ANLN              | Mus musculus anillin, actin binding protein (Anln), mRNA.                                                                                                 | NM_028390.2                               | 0.17991                       |   |
| FBLN1             | Mus musculus fibulin 1 (Fbln1), mRNA.                                                                                                                     | NM_010180.1                               | 0.18019                       |   |
| CXCL4             | Mus musculus chemokine (C-X-C motif) ligand 4 (Cxcl4), mRNA.                                                                                              | NM_019932.2                               | 0.18065                       | * |
| MFAP2             | Mus musculus microfibrillar-associated protein 2 (Mfap2), mRNA.                                                                                           | NM_008546.2<br>NM_008546.2<br>NM_008546.2 | 0.18086<br>0.259<br>0.27577   | * |
| HP                | Mus musculus haptoglobin (Hp), mRNA.                                                                                                                      | NM_017370.1<br>NM_017370.1<br>NM_017370.1 | 0.18333<br>0.41672<br>0.4727  | * |
| NFIL3             | PREDICTED: Mus musculus similar to NFIL3/E4BP4 transcription factor (LOC100046232), mRNA.                                                                 | XM_00147581<br>7.1                        | 0.18485                       |   |
| CDC20             | Mus musculus cell division cycle 20 homolog (S. cerevisiae) (Cdc20), mRNA.                                                                                | NM_023223.1<br>NM_023223.1<br>NM_023223.1 | 0.18489<br>0.34963<br>0.35414 |   |
| PLK1              | Mus musculus polo-like kinase 1 (Drosophila) (Plk1), mRNA.                                                                                                | NM_011121.3                               | 0.18491                       |   |
| HCPH              | Mus musculus protein tyrosine phosphatase, non-receptor type 6 (Ptpn6), transcript variant 2, mRNA.                                                       | NM_0010777<br>05.1                        | 0.18546                       |   |
| LST1              | Mus musculus liver-specific organic anion transporter (Lst1) mRNA.                                                                                        | XM_359281.1                               | 0.18555                       |   |
| TLR13             | Mus musculus toll-like receptor 13 (Tlr13), mRNA.                                                                                                         | NM_205820.1                               | 0.1866                        |   |

|                   |                                                                                                                   |                                           |                               |   |
|-------------------|-------------------------------------------------------------------------------------------------------------------|-------------------------------------------|-------------------------------|---|
| C1QA              | Mus musculus complement component 1, q subcomponent, alpha polypeptide (C1qa), mRNA.                              | NM_007572.2                               | 0.19278                       | * |
| SLAMF9            | Mus musculus SLAM family member 9 (Slamf9), mRNA.                                                                 | NM_029612.3                               | 0.19353                       |   |
| APOBEC1           | Mus musculus apolipoprotein B mRNA editing enzyme, catalytic polypeptide 1 (ApoBec1), transcript variant 1, mRNA. | NM_031159.3                               | 0.19424                       |   |
| SMOC1             | Mus musculus SPARC related modular calcium binding 1 (Smoc1), mRNA.                                               | NM_022316.1                               | 0.19476                       |   |
| CCL3              | Mus musculus chemokine (C-C motif) ligand 3 (Ccl3), mRNA.                                                         | NM_011337.2                               | 0.19482                       |   |
| EMILIN2           | Mus musculus elastin microfibril interfacer 2 (Emilin2), mRNA.                                                    | NM_145158.2                               | 0.19501                       |   |
| PBK               | Mus musculus PDZ binding kinase (Pbk), mRNA.                                                                      | NM_023209.1                               | 0.19636                       |   |
| 633040615R<br>IK  | Mus musculus RIKEN cDNA 633040615 gene (633040615Rik), mRNA.                                                      | NM_027519.1                               | 0.19828                       | * |
| RPS6KA1           | Mus musculus ribosomal protein S6 kinase polypeptide 1 (Rps6ka1), mRNA.                                           | NM_009097.1                               | 0.19858                       |   |
| CYP7B1            | Mus musculus cytochrome P450, family 7, subfamily b, polypeptide 1 (Cyp7b1), mRNA.                                | NM_007825.3                               | 0.19979                       | * |
| BC013481          | Mus musculus RNA binding motif protein 47 (Rbm47), mRNA.                                                          | NM_178446.2                               | 0.20078                       |   |
| FCRL3             | Mus musculus Fc receptor, IgG, low affinity IV (Fcgr4), mRNA.                                                     | NM_144559.1                               | 0.20276                       |   |
| GMFG              | Mus musculus glia maturation factor, gamma (Gmfg), transcript variant 1, mRNA.                                    | NM_022024.2<br>NM_022024.2                | 0.20309<br>0.23556            | * |
| BIRC5             | Mus musculus baculoviral IAP repeat-containing 5 (Birc5), transcript variant 1, mRNA.                             | NM_009689.1<br>NM_009689.2<br>NM_009689.2 | 0.20396<br>0.24155<br>0.26431 |   |
| 633040615R<br>IK  | Mus musculus RIKEN cDNA 633040615 gene (633040615Rik), mRNA.                                                      | NM_027519.3                               | 0.20417                       | * |
| CCL4              | Mus musculus chemokine (C-C motif) ligand 4 (Ccl4), mRNA.                                                         | NM_013652.2                               | 0.20766                       |   |
| 1200002N14<br>RIK | Mus musculus RIKEN cDNA 1200002N14 gene (1200002N14Rik), mRNA.                                                    | NM_027878.2                               | 0.20795                       | * |
| APOB48R           | Mus musculus apolipoprotein B48 receptor (ApoB48r), mRNA.                                                         | NM_138310.1                               | 0.20797                       |   |
| CSF1R             | Mus musculus colony stimulating factor 1 receptor (Csf1r), mRNA.                                                  | NM_0010378<br>59.2                        | 0.2102                        |   |
| IGFBP5            | Mus musculus insulin-like growth factor binding protein 5 (Igfbp5), mRNA.                                         | NM_010518.2                               | 0.21306                       | * |
| 1300002F13<br>RIK | Mus musculus ERBB receptor feedback inhibitor 1 (Errfi1), mRNA.                                                   | NM_133753.1                               | 0.2132                        | * |
| ELMO1             | Mus musculus engulfment and cell motility 1, ced-12 homolog (C. elegans) (Elmo1), transcript variant 2, mRNA.     | NM_198093.2                               | 0.2135                        |   |
| HMG2              | Mus musculus high mobility group nucleosomal binding domain 2 (Hmgn2), mRNA.                                      | NM_016957.3                               | 0.21351                       |   |
| SLC15A3           | Mus musculus solute carrier family 15, member 3 (Slc15a3), mRNA.                                                  | NM_023044.1                               | 0.21475                       |   |
| OLFML3            | Mus musculus olfactomedin-like 3 (Olfml3), mRNA.                                                                  | NM_133859.2                               | 0.21513                       |   |
| MYLK              | Mus musculus myosin, light polypeptide kinase (Mylk), mRNA.                                                       | NM_139300.3<br>NM_139300.3                | 0.21625<br>0.2756             |   |
| ZFP36             | Mus musculus zinc finger protein 36 (Zfp36), mRNA.                                                                | NM_011756.4                               | 0.21637                       |   |
| 4632417K18<br>RIK | Mus musculus RIKEN cDNA 4632417K18 gene (4632417K18Rik), mRNA.                                                    | NM_026640.2                               | 0.21756                       |   |
| COL3A1            | Mus musculus collagen, type III, alpha 1 (Col3a1), mRNA.                                                          | NM_009930.1                               | 0.2207                        | * |
| LOC1000342<br>51  | Mus musculus predicted gene, OTTMUSG00000000971 (OTTMUSG00000000971), mRNA.                                       | NM_0010819<br>57.1                        | 0.22164                       |   |
| COL18A1           | Mus musculus procollagen, type XVIII, alpha 1 (Col18a1), mRNA.                                                    | NM_009929.2                               | 0.2239                        |   |
| RGS1              | Mus musculus regulator of G-protein signaling 1 (Rgs1), mRNA.                                                     | NM_015811.1<br>NM_015811.1<br>NM_015811.1 | 0.22631<br>0.42553<br>0.45232 |   |
| APOE              | Mus musculus apolipoprotein E (ApoE), mRNA.                                                                       | NM_009696.2                               | 0.22645                       |   |
| NUSAP1            | Mus musculus nucleolar and spindle associated protein 1 (Nusap1), transcript variant 2, mRNA.                     | NM_0010426<br>52.1                        | 0.22666                       |   |
| HK3               | Mus musculus hexokinase 3 (Hk3), nuclear gene encoding mitochondrial protein, mRNA.                               | NM_0010332<br>45.3                        | 0.22785                       |   |

|                   |                                                                                                                             |                            |                    |   |
|-------------------|-----------------------------------------------------------------------------------------------------------------------------|----------------------------|--------------------|---|
| ZFP36L1           | Mus musculus zinc finger protein 36, C3H type-like 1 (Zfp36l1), mRNA.                                                       | NM_007564.2<br>NM_007564.4 | 0.22805<br>0.26544 | * |
| LGMN              | Mus musculus legumain (Lgmn), mRNA.                                                                                         | NM_011175.2                | 0.22864            | * |
| H2-AB1            | Mus musculus histocompatibility 2, class II antigen A, beta 1 (H2-Ab1), mRNA.                                               | NM_207105.2                | 0.23107            |   |
| LGALS3BP          | Mus musculus lectin, galactoside-binding, soluble, 3 binding protein (Lgals3bp), mRNA.                                      | NM_011150.2                | 0.23114            |   |
| BTK               | Mus musculus Bruton agammaglobulinemia tyrosine kinase (Btk), mRNA.                                                         | NM_013482.1                | 0.23157            |   |
| SOCS3             | Mus musculus suppressor of cytokine signaling 3 (SoCS3), mRNA.                                                              | NM_007707.2                | 0.23266            |   |
| FES               | Mus musculus feline sarcoma oncogene (Fes), mRNA.                                                                           | NM_010194.2                | 0.23406            |   |
| GBP2              | Mus musculus guanylate binding protein 2 (Gbp2), mRNA.                                                                      | NM_010260.1                | 0.23663            |   |
| CTSS              | Mus musculus cathepsin S (Ctss), mRNA.                                                                                      | NM_021281.1                | 0.23739            |   |
| RBM3              | PREDICTED: Mus musculus similar to RNA binding motif protein 3 (LOC100043257), mRNA.                                        | XM_00148019<br>7.1         | 0.23785            | * |
| RAB8B             | Mus musculus RAB8B, member RAS oncogene family (Rab8b), mRNA.                                                               | NM_173413.2<br>NM_173413.2 | 0.23791<br>0.27441 |   |
| MYO1G             | Mus musculus myosin IG (Myo1g), mRNA.                                                                                       | NM_178440.2                | 0.23811            |   |
| PARP14            | Mus musculus poly (ADP-ribose) polymerase family, member 14 (Parp14), mRNA. XM_901644 XM_916789 XM_924484 XM_924488         | NM_0010395<br>30.1         | 0.23892            |   |
| LCP1              | Mus musculus lymphocyte cytosolic protein 1 (Lcp1), mRNA.                                                                   | NM_008879.3                | 0.23989            |   |
| CDC2A             | Mus musculus cell division cycle 2 homolog A (S. pombe) (Cdc2a), mRNA.                                                      | NM_007659.3                | 0.24236            |   |
| SLPI              | Mus musculus secretory leukocyte peptidase inhibitor (Slpi), mRNA.                                                          | NM_011414.2                | 0.24292            | * |
| UBE1L             | Mus musculus ubiquitin-activating enzyme E1-like (Ube1l), mRNA.                                                             | NM_023738.4                | 0.24773            |   |
| SERPING1          | Mus musculus serine (or cysteine) peptidase inhibitor, clade G, member 1 (Serp1g), mRNA.                                    | NM_009776.1                | 0.24935            | * |
| DOK3              | Mus musculus docking protein 3 (Dok3), mRNA.                                                                                | NM_013739.2                | 0.24945            |   |
| A230050P20<br>RIK | Mus musculus RIKEN cDNA A230050P20 gene (A230050P20Rik), mRNA.                                                              | NM_175687.1                | 0.24993            |   |
| EDNRA             | Mus musculus endothelin receptor type A (Ednra), mRNA.                                                                      | NM_010332.2                | 0.25053            |   |
| SIRPB1            | Mus musculus signal-regulatory protein beta 1 (Sirpb1), transcript variant 3, mRNA.                                         | NM_0010028<br>98.1         | 0.25071            | * |
| PFKL              | Mus musculus phosphofructokinase, liver, B-type (Pfkf), mRNA.                                                               | NM_008826.3                | 0.25146            | * |
| NRM               | Mus musculus nurim (nuclear envelope membrane protein) (Nrm), mRNA.                                                         | NM_134122.2                | 0.25211            |   |
| ARRB2             | Mus musculus arrestin, beta 2 (Arrb2), mRNA.                                                                                | NM_145429.4                | 0.25506            |   |
| 2310056P07<br>RIK | Mus musculus family with sequence similarity 162, member A (Fam162a), mRNA.                                                 | NM_027342.1                | 0.25677            | * |
| AA175286          | PREDICTED: Mus musculus sterile alpha motif domain containing 9-like, transcript variant 1 (Samd9l), mRNA.                  | XM_620286.3                | 0.25754            |   |
| GLRX              | Mus musculus glutaredoxin (Glrx), mRNA.                                                                                     | NM_053108.2                | 0.25757            |   |
| ADAMTS2           | Mus musculus a disintegrin-like and metallopeptidase (reprolysin type) with thrombospondin type 1 motif, 2 (Adamts2), mRNA. | NM_175643.2<br>NM_175643.2 | 0.25883<br>0.2796  |   |
| AI132321          | Mus musculus phospholipase D family, member 4 (Pld4), mRNA.                                                                 | NM_178911.4                | 0.2594             |   |
| STK6              | Mus musculus aurora kinase A (Aurka), mRNA.                                                                                 | NM_011497.3                | 0.2609             |   |
| SELENBP1          | PREDICTED: Mus musculus hypothetical protein LOC100044204 (LOC100044204), mRNA.                                             | XM_00147169<br>6.1         | 0.26133            | * |
| MFAP5             | Mus musculus microfibrillar associated protein 5 (Mfap5), mRNA.                                                             | NM_015776.2                | 0.26267            |   |
| PIRA4             | Mus musculus paired-Ig-like receptor A4 (Pira4), mRNA.                                                                      | NM_011091.1                | 0.26305            | * |
| HIST1H2AG         | Mus musculus histone cluster 1, H2ag (Hist1h2ag), mRNA.                                                                     | NM_178186.2                | 0.26455            | * |
| ARHGAP30          | Mus musculus Rho GTPase activating protein 30 (Arhgap30), mRNA.                                                             | NM_0010055<br>08.1         | 0.26709            |   |
| KNG1              | Mus musculus kininogen 1 (Kng1), mRNA.                                                                                      | NM_023125.2                | 0.26822            |   |
| KIF22             | Mus musculus kinesin family member 22 (Kif22), mRNA.                                                                        | NM_145588.1                | 0.26835            |   |

|                   |                                                                                                                            |                                           |                               |   |
|-------------------|----------------------------------------------------------------------------------------------------------------------------|-------------------------------------------|-------------------------------|---|
| DOK2              | Mus musculus docking protein 2 (Dok2), mRNA.                                                                               | NM_010071.2                               | 0.26926                       |   |
| 2700094K13<br>RIK | Mus musculus RIKEN cDNA 2700094K13 gene (2700094K13Rik), transcript variant 2, mRNA.                                       | NM_0010372<br>79.1                        | 0.27098                       |   |
| PDGFB             | Mus musculus platelet-derived growth factor B (Pdgfb) mRNA.                                                                | NM_011057.2                               | 0.27199                       |   |
| CD53              | Mus musculus CD53 antigen (Cd53), mRNA.                                                                                    | NM_007651.2                               | 0.27232                       |   |
| A1586015          | Mus musculus signal transducing adaptor family member 1 (Stap1), mRNA.                                                     | NM_019992.3                               | 0.27272                       |   |
| TGM2              | Mus musculus transglutaminase 2, C polypeptide (Tgm2), mRNA.                                                               | NM_009373.3                               | 0.2746                        |   |
| IFIT3             | Mus musculus interferon-induced protein with tetratricopeptide repeats 3 (Ifit3), mRNA.                                    | NM_010501.1                               | 0.27671                       |   |
| GAS6              | Mus musculus growth arrest specific 6 (Gas6), mRNA.                                                                        | NM_019521.2                               | 0.27858                       |   |
| G1P2              | PREDICTED: Mus musculus hypothetical protein LOC100038882 (LOC100038882), mRNA.                                            | XM_00147168<br>6.1                        | 0.27871                       |   |
| A1481100          | Mus musculus interferon inducible GTPase 2 (Iigp2), mRNA.                                                                  | NM_019440.2                               | 0.27876                       |   |
| TGFBR3            | Mus musculus transforming growth factor, beta receptor III (Tgfbr3), mRNA.                                                 | NM_011578.2                               | 0.27966                       |   |
| ADAM8             | Mus musculus a disintegrin and metallopeptidase domain 8 (Adam8), mRNA.                                                    | NM_007403.2<br>NM_007403.2                | 0.27974<br>0.32845            |   |
| FYB               | Mus musculus FYN binding protein (Fyb), mRNA.                                                                              | NM_011815.1                               | 0.2812                        |   |
| CXCL12            | Mus musculus chemokine (C-X-C motif) ligand 12 (Cxcl12), transcript variant 3, mRNA.                                       | NM_013655.2<br>NM_021704.2<br>NM_021704.2 | 0.28324<br>0.37782<br>0.40775 | * |
| TYMS              | Mus musculus thymidylate synthase (Tyms), mRNA.                                                                            | NM_021288.3                               | 0.28611                       |   |
| 4732429D16<br>RIK | Mus musculus RIKEN cDNA 4732429D16 gene (4732429D16Rik), mRNA.                                                             | NM_145437.2                               | 0.28756                       |   |
| RAMP2             | Mus musculus receptor (calcitonin) activity modifying protein 2 (Ramp2), mRNA.                                             | NM_019444.2                               | 0.28785                       | * |
| RSPO3             | Mus musculus R-spondin 3 homolog (Xenopus laevis) (Rspo3), mRNA.                                                           | NM_028351.2                               | 0.28962                       | * |
| TOP2A             | Mus musculus topoisomerase (DNA) II alpha (Top2a), mRNA.                                                                   | NM_011623.1                               | 0.29004                       |   |
| CXCL5             | PREDICTED: Mus musculus similar to LPS-induced CXC chemokine (LOC100044702), mRNA.                                         | XM_00147269<br>9.1                        | 0.29091                       |   |
| IFITM3            | Mus musculus interferon induced transmembrane protein 3 (Ifitm3), mRNA.                                                    | NM_025378.2                               | 0.29163                       |   |
| A1467606          | Mus musculus expressed sequence A1467606 (A1467606), mRNA.                                                                 | NM_178901.3                               | 0.29215                       |   |
| 2510004L01<br>RIK | Mus musculus radical S-adenosyl methionine domain containing 2 (Rsad2), mRNA.                                              | NM_021384.3                               | 0.29317                       |   |
| FSTL1             | Mus musculus follistatin-like 1 (Fstl1), mRNA.                                                                             | NM_008047.4                               | 0.29322                       |   |
| LHFPL2            | Mus musculus lipoma HMGIC fusion partner-like 2 (Lhfpl2), mRNA.                                                            | NM_172589.2                               | 0.29358                       |   |
| MEOX2             | Mus musculus mesenchyme homeobox 2 (Meox2), mRNA.                                                                          | NM_008584.3                               | 0.29404                       |   |
| D930038M1<br>3RIK | Mus musculus ABI gene family, member 3 (NESH) binding protein (Abi3bp), transcript variant 1, mRNA.                        | NM_178790.3                               | 0.2955                        | * |
| LDB2              | Mus musculus LIM domain-binding protein (Ldb2) mRNA.                                                                       | NM_010698.2                               | 0.29632                       | * |
| H2-M3             | Mus musculus histocompatibility 2, M region locus 3 (H2-M3), mRNA.                                                         | NM_013819.2                               | 0.29638                       |   |
| DPT               | Mus musculus dermatopontin (Dpt), mRNA.                                                                                    | NM_019759.2                               | 0.29739                       | * |
| KCNK13            | Mus musculus potassium channel, subfamily K, member 13 (Kcnk13), mRNA.                                                     | NM_146037.1                               | 0.29916                       |   |
| SLC2A1            | Mus musculus solute carrier family 2 (facilitated glucose transporter), member 1 (Slc2a1), mRNA.                           | NM_011400.2                               | 0.29917                       | * |
| IGSF4A            | Mus musculus immunoglobulin superfamily member 4A (Igsf4a) mRNA.                                                           |                                           | 0.30045                       |   |
| LIG1              | Mus musculus ligase I, DNA, ATP-dependent (Lig1), transcript variant 2, mRNA.                                              | NM_010715.2                               | 0.30209                       |   |
| RNF144            | Mus musculus ring finger protein 144A (Rnf144a), transcript variant 2, mRNA.                                               | NM_080563.3                               | 0.30219                       |   |
| MCM6              | Mus musculus minichromosome maintenance deficient 6 (MIS5 homolog, S. pombe) (S. cerevisiae) (Mcm6), mRNA.                 | NM_008567.1<br>NM_008567.1<br>NM_008567.1 | 0.30253<br>0.32313<br>0.39003 |   |
| PLEKHA2           | Mus musculus pleckstrin homology domain-containing, family A (phosphoinositide binding specific) member 2 (Plekha2), mRNA. | NM_031257.2                               | 0.30295                       |   |

|                   |                                                                                                                                 |                                           |                               |   |
|-------------------|---------------------------------------------------------------------------------------------------------------------------------|-------------------------------------------|-------------------------------|---|
| OLFML1            | Mus musculus olfactomedin-like 1 (Olfml1), mRNA.                                                                                | NM_172907.2                               | 0.30502                       | * |
| ADD3              | Mus musculus adducin 3 (gamma) (Add3), mRNA.                                                                                    | NM_013758.2<br>NM_013758.2                | 0.30683<br>0.48848            | * |
| CRABP1            | Mus musculus cellular retinoic acid binding protein I (Crabp1), mRNA.                                                           | NM_013496.2                               | 0.30772                       |   |
| PRKCB             | Mus musculus protein kinase C, beta (Prkcb), mRNA.                                                                              | NM_008855.2                               | 0.30783                       |   |
| HIST2H2AC         | Mus musculus histone cluster 2, H2ac (Hist2h2ac), mRNA.                                                                         | NM_175662.1                               | 0.30805                       |   |
| NCAPH             | Mus musculus non-SMC condensin I complex, subunit H (Ncaph), mRNA.                                                              | NM_144818.1                               | 0.30911                       |   |
| ETS2              | Mus musculus E26 avian leukemia oncogene 2, 3' domain (Ets2), mRNA.                                                             | NM_011809.2                               | 0.30972                       |   |
| CUGBP2            | Mus musculus CUG triplet repeat, RNA binding protein 2 (Cugbp2), transcript variant 6, mRNA.                                    | NM_010160.2                               | 0.31011                       |   |
| EGLN3             | Mus musculus EGL nine homolog 3 (C. elegans) (Egln3), mRNA.                                                                     | NM_028133.1                               | 0.31063                       | * |
| 1200009O22<br>RIK | Mus musculus RIKEN cDNA 1200009O22 gene (1200009O22Rik), mRNA.                                                                  | NM_025817.3                               | 0.3116                        | * |
| HTR2B             | Mus musculus 5-hydroxytryptamine (serotonin) receptor 2B (Htr2b), mRNA.                                                         | NM_008311.2                               | 0.31208                       |   |
| 2810417H13<br>RIK | Mus musculus RIKEN cDNA 2810417H13 gene (2810417H13Rik), mRNA.                                                                  | NM_026515.2                               | 0.31595                       |   |
| PLCG2             | Mus musculus phospholipase C, gamma 2 (Plcg2), mRNA.                                                                            | NM_172285.1                               | 0.3161                        |   |
| MCM4              | Mus musculus minichromosome maintenance deficient 4 homolog (S. cerevisiae) (Mcm4), mRNA.                                       | NM_008565.2                               | 0.31697                       |   |
| CCR5              | Mus musculus chemokine (C-C motif) receptor 5 (Ccr5), mRNA.                                                                     | NM_009917.2<br>NM_009917.2<br>NM_009917.4 | 0.31747<br>0.32485<br>0.38806 | * |
| SMARCA1           | Mus musculus SWI/SNF related, matrix associated, actin dependent regulator of chromatin, subfamily a, member 1 (Smarca1), mRNA. | NM_053123.3                               | 0.31761                       | * |
| ALDH3B1           | Mus musculus aldehyde dehydrogenase 3 family, member B1 (Aldh3b1), mRNA.                                                        | NM_026316.2<br>NM_026316.2                | 0.31888<br>0.47899            | * |
| MEST              | Mus musculus mesoderm specific transcript (Mest), mRNA.                                                                         | NM_008590.1<br>NM_008590.1                | 0.31959<br>0.39186            | * |
| TRF               | Mus musculus transferrin (Trf), mRNA.                                                                                           | NM_133977.2                               | 0.31982                       |   |
| ANGPTL4           | Mus musculus angiopoietin-like 4 (Angptl4), mRNA.                                                                               | NM_020581.1                               | 0.32088                       |   |
| UNC93B1           | Mus musculus unc-93 homolog B1 (C. elegans) (Unc93b1), mRNA.                                                                    | NM_019449.1                               | 0.32173                       |   |
| AADA1             | Mus musculus arylacetamide deacetylase-like 1 (Aada1), mRNA.                                                                    | NM_178772.2                               | 0.32218                       |   |
| EBI3              | Mus musculus Epstein-Barr virus induced gene 3 (Ebi3), mRNA.                                                                    | NM_015766.2                               | 0.32241                       |   |
| SH3BP2            | Mus musculus SH3-domain binding protein 2 (Sh3bp2), mRNA.                                                                       | NM_011893.2                               | 0.32393                       |   |
| LMNB1             | Mus musculus lamin B1 (Lmnb1), mRNA.                                                                                            | NM_010721.1                               | 0.3261                        |   |
| SLC40A1           | Mus musculus solute carrier family 40 (iron-regulated transporter), member 1 (Slc40a1), mRNA.                                   | NM_016917.2                               | 0.32805                       |   |
| WAS               | Mus musculus Wiskott-Aldrich syndrome homolog (human) (Was), mRNA.                                                              | NM_009515.1                               | 0.32929                       |   |
| HTRA3             | Mus musculus HtrA serine peptidase 3 (Htra3) mRNA.                                                                              | NM_030127.1                               | 0.32964                       |   |
| XDH               | Mus musculus xanthine dehydrogenase (Xdh), mRNA.                                                                                | NM_011723.2                               | 0.33023                       |   |
| SELPL             | Mus musculus selectin, platelet (p-selectin) ligand (Selplg), mRNA.                                                             | NM_009151.2                               | 0.33025                       |   |
| NID2              | Mus musculus nidogen 2 (Nid2), mRNA.                                                                                            | NM_008695.2                               | 0.3322                        | * |
| EHD4              | Mus musculus EH-domain containing 4 (Ehd4), mRNA.                                                                               | NM_133838.4                               | 0.33274                       | * |
| OAS2              | Mus musculus 2'-5' oligoadenylate synthetase 2 (Oas2), mRNA.                                                                    | NM_145227.1                               | 0.33594                       |   |
| FMO1              | Mus musculus flavin containing monooxygenase 1 (Fmo1), mRNA.                                                                    | NM_010231.2                               | 0.33665                       | * |
| ARHGAP4           | Mus musculus Rho GTPase activating protein 4 (Arhgap4), mRNA.                                                                   | NM_138630.1                               | 0.33721                       |   |
| PVRL2             | Mus musculus poliovirus receptor-related 2 (Pvrl2), mRNA.                                                                       | NM_008990.2<br>NM_008990.2                | 0.33784<br>0.41621            |   |
| KLF2              | Mus musculus Kruppel-like factor 2 (lung) (Klf2), mRNA.                                                                         | NM_008452.1                               | 0.33799                       |   |
| MCM10             | Mus musculus minichromosome maintenance deficient 10 (S. cerevisiae) (Mcm10), mRNA.                                             | NM_027290.1                               | 0.34008                       |   |

|                   |                                                                                                                            |                            |                    |   |
|-------------------|----------------------------------------------------------------------------------------------------------------------------|----------------------------|--------------------|---|
| PIK3CG            | Mus musculus phosphoinositide-3-kinase, catalytic, gamma polypeptide (Pik3cg), mRNA.                                       | NM_020272.1                | 0.34035            |   |
| PSTPIP1           | Mus musculus proline-serine-threonine phosphatase-interacting protein 1 (Pstpip1), mRNA.                                   | NM_011193.1                | 0.34421            |   |
| STARD8            | Mus musculus START domain containing 8 (Stard8), mRNA.                                                                     | NM_199018.1<br>NM_199018.1 | 0.34453<br>0.44115 |   |
| COL1A1            | Mus musculus collagen, type I, alpha 1 (Col1a1), mRNA.                                                                     | NM_007742.2                | 0.34461            |   |
| FEN1              | Mus musculus flap structure specific endonuclease 1 (Fen1), mRNA.                                                          | NM_007999.3                | 0.34486            |   |
| PRDX4             | Mus musculus peroxiredoxin 4 (Prdx4), mRNA.                                                                                | NM_016764.3                | 0.34493            |   |
| FGFR1OP2          | Mus musculus FGFR1 oncogene partner 2 (Fgfr1op2), mRNA.                                                                    | NM_026218.2                | 0.34529            |   |
| MMP13             | Mus musculus matrix metalloproteinase 13 (Mmp13), mRNA.                                                                    | NM_008607.1                | 0.34616            |   |
| HCLS1             | Mus musculus hematopoietic cell specific Lyn substrate 1 (Hcls1), mRNA.                                                    | NM_008225.1                | 0.34628            |   |
| PSMB9             | Mus musculus proteasome (prosome, macropain) subunit, beta type 9 (large multifunctional peptidase 2) (Psm9), mRNA.        | NM_013585.2                | 0.34632            |   |
| ACTG2             | Mus musculus actin, gamma 2, smooth muscle, enteric (Actg2), mRNA.                                                         | NM_009610.1                | 0.34644            |   |
| CDKN1C            | Mus musculus cyclin-dependent kinase inhibitor 1C (P57) (Cdkn1c), mRNA.                                                    | NM_009876.3                | 0.3476             | * |
| AGTR1A            | Mus musculus angiotensin II receptor, type 1a (Agtr1a), mRNA.                                                              | NM_177322.2                | 0.34774            | * |
| 1190002H23<br>RIK | Mus musculus RIKEN cDNA 1190002H23 gene (1190002H23Rik), mRNA.                                                             | NM_025427.2                | 0.34816            | * |
| NNMT              | Mus musculus nicotinamide N-methyltransferase (Nnmt), mRNA.                                                                | NM_010924.1                | 0.34839            |   |
| STXBP2            | Mus musculus syntaxin-binding protein 2 (Stxbp2) mRNA.                                                                     | NM_011503.2                | 0.34934            |   |
| PLEKHA4           | Mus musculus pleckstrin homology domain containing, family A (phosphoinositide binding specific) member 4 (Plekha4), mRNA. | NM_148927.1                | 0.35053            |   |
| CD180             | Mus musculus CD180 antigen (Cd180), mRNA.                                                                                  | NM_008533.2                | 0.35076            |   |
| D12ERTD553<br>E   | Mus musculus DNA segment, Chr 12, ERATO Doi 553, expressed (D12ErtD553e), mRNA.                                            | NM_029758.3                | 0.35205            |   |
| 2310016C08<br>RIK | Mus musculus RIKEN cDNA 2310016C08 gene (2310016C08Rik), mRNA.                                                             | NM_023516.3                | 0.35281            |   |
| BC032204          | Mus musculus fermitin family homolog 3 (Drosophila) (Fermt3), mRNA.                                                        | NM_153795.1                | 0.35284            |   |
| KIF2C             | Mus musculus kinesin family member 2C (Kif2c), mRNA. XM_986361                                                             | NM_134471.3                | 0.35353            |   |
| SERPINA3N         | Mus musculus serine (or cysteine) peptidase inhibitor, clade A, member 3N (Serpina3n), mRNA.                               | NM_009252.2                | 0.35442            |   |
| TYMS-PS           | Mus musculus thymidylate synthase, pseudogene (Tyms-ps), non-coding RNA.                                                   | NR_000040.1                | 0.35575            |   |
| CDCA7             | Mus musculus cell division cycle associated 7 (Cdc7), mRNA.                                                                | NM_025866.3                | 0.35656            |   |
| TXNIP             | Mus musculus thioredoxin interacting protein (Txnip), transcript variant 1, mRNA.                                          | NM_0010099<br>35.2         | 0.35698            | * |
| 2310057H16<br>RIK | Mus musculus tubulin, beta 6 (Tubb6), mRNA.                                                                                | NM_026473.2                | 0.35893            |   |
| BICC1             | Mus musculus bicaudal C homolog 1 (Drosophila) (Bicc1), mRNA.                                                              | NM_031397.2                | 0.35937            |   |
| LBP               | Mus musculus lipopolysaccharide binding protein (Lbp), mRNA.                                                               | NM_008489.2                | 0.35964            | * |
| COL6A2            | Mus musculus procollagen, type VI, alpha 2 (Col6a2), mRNA.                                                                 | NM_146007.1                | 0.36               |   |
| GPNCB             | Mus musculus glycoprotein (transmembrane) nmb (Gpncb), mRNA.                                                               | NM_053110.3<br>NM_053110.2 | 0.36165<br>0.49491 |   |
| 5430435G22<br>RIK | Mus musculus RIKEN cDNA 5430435G22 gene (5430435G22Rik), mRNA.                                                             | NM_145509.1                | 0.36174            |   |
| D14ERTD226<br>E   | Mus musculus tetraspanin 14 (Tspan14), mRNA.                                                                               | NM_145928.1                | 0.3619             |   |
| LY9               | Mus musculus lymphocyte antigen 9 (Ly9), mRNA.                                                                             | NM_008534.2                | 0.36195            |   |
| THBS2             | Mus musculus thrombospondin 2 (Thbs2), mRNA.                                                                               | NM_011581.1                | 0.36245            |   |
| RGS10             | Mus musculus regulator of G-protein signalling 10 (Rgs10), mRNA.                                                           | NM_026418.2                | 0.36297            |   |
| H2-AB1            | PREDICTED: Mus musculus similar to MHC class II antigen beta chain (LOC641240), mRNA.                                      | XM_918601.3                | 0.36309            |   |
| FIGNL1            | Mus musculus fidgetin-like 1 (Fignl1), mRNA.                                                                               | NM_021891.2                | 0.3644             |   |



|                   |                                                                                                                    |                            |                   |   |
|-------------------|--------------------------------------------------------------------------------------------------------------------|----------------------------|-------------------|---|
| 1200013B08<br>RIK | Mus musculus RIKEN cDNA 1200013B08 gene (1200013B08Rik), mRNA.                                                     | NM_028773.2                | 0.36454           |   |
| SAMHD1            | Mus musculus SAM domain and HD domain, 1 (Samhd1), mRNA.                                                           | NM_018851.2                | 0.36484           |   |
| CD248             | Mus musculus CD248 antigen, endosialin (Cd248), mRNA.                                                              | NM_054042.2                | 0.36556           |   |
| PLAC8             | Mus musculus placenta-specific 8 (Plac8), mRNA.                                                                    | NM_139198.1                | 0.36585           |   |
| H2AFZ             | Mus musculus H2A histone family, member Z (H2afz), mRNA.                                                           | NM_016750.1                | 0.36586           |   |
| AL024069          | Mus musculus RIKEN cDNA 5033414K04 gene (5033414K04Rik), mRNA.                                                     | NM_0010039<br>48.1         | 0.36658           |   |
| PDK1              | Mus musculus pyruvate dehydrogenase kinase, isoenzyme 1 (Pdk1), nuclear gene encoding mitochondrial protein, mRNA. | NM_172665.3                | 0.36676           | * |
| AW046396          | Mus musculus a disintegrin and metallopeptidase domain 23 (Adam23), mRNA.                                          | NM_011780.2                | 0.36698           |   |
| RARRES2           | Mus musculus retinoic acid receptor responder (tazarotene induced) 2 (Rarres2), mRNA.                              | NM_027852.1                | 0.36712           | * |
| CX3CR1            | Mus musculus chemokine CX3C receptor 1 (Cx3cr1) mRNA.                                                              | NM_009987.2                | 0.36835           |   |
| SPAG5             | Mus musculus sperm associated antigen 5 (Spag5), mRNA.                                                             | NM_017407.1                | 0.36915           |   |
| HAS2              | Mus musculus hyaluronan synthase 2 (Has2), mRNA.                                                                   | NM_008216.2                | 0.37107           |   |
| PMP22             | Mus musculus peripheral myelin protein 22 (Pmp22), mRNA.                                                           | NM_008885.2<br>NM_008885.2 | 0.3713<br>0.46766 |   |
| MSR2              | Mus musculus macrophage scavenger receptor 2 (Msr2), mRNA.                                                         | NM_030707.1                | 0.37187           |   |
| KIF23             | Mus musculus kinesin family member 23 (Kif23), mRNA.                                                               | NM_024245.3                | 0.37337           |   |
| RASL12            | Mus musculus RAS-like, family 12 (Rasl12), mRNA.                                                                   | NM_0010331<br>58.1         | 0.37355           |   |
| LIP1              | Mus musculus lysosomal acid lipase 1 (Lip1) mRNA.                                                                  | NM_021460.1                | 0.37369           |   |
| OAS1G             | Mus musculus 2'-5' oligoadenylate synthetase 1G (Oas1g), mRNA.                                                     | NM_011852.2                | 0.37414           |   |
| SEPP1             | Mus musculus selenoprotein P, plasma, 1 (Sepp1), transcript variant 1, mRNA.                                       | NM_009155.3                | 0.3748            |   |
| SAP30             | Mus musculus sin3 associated polypeptide (Sap30), mRNA.                                                            | NM_021788.1                | 0.37556           |   |
| IGFBP3            | Mus musculus insulin-like growth factor binding protein 3 (Igfbp3), mRNA.                                          | NM_008343.2                | 0.37679           | * |
| CPXM1             | Mus musculus carboxypeptidase X 1 (M14 family) (Cpxm1), mRNA.                                                      | NM_019696.1                | 0.37692           |   |
| 1810009M01<br>RIK | Mus musculus transmembrane protein 176B (Tmem176b), mRNA.                                                          | NM_023056.3                | 0.37818           |   |
| LY6C              | Mus musculus lymphocyte antigen 6 complex, locus C1 (Ly6c1), mRNA.                                                 | NM_010741.2                | 0.37845           |   |
| SESN1             | Mus musculus sestrin 1 (Sesn1), mRNA.                                                                              | NM_0010133<br>70.1         | 0.37882           |   |
| 6330403K07<br>RIK | Mus musculus RIKEN cDNA 6330403K07 gene (6330403K07Rik), mRNA.                                                     | NM_134022.2                | 0.37961           |   |
| SOCS2             | Mus musculus suppressor of cytokine signaling 2 (Soxs2), mRNA.                                                     | NM_007706.3                | 0.38076           |   |
| CAR9              | Mus musculus carbonic anhydrase 9 (Car9), mRNA.                                                                    | NM_139305.1                | 0.38079           | * |
| MMP23             | Mus musculus matrix metallopeptidase 23 (Mmp23), mRNA.                                                             | NM_011985.2                | 0.38102           |   |
| H2-AB1            | Mus musculus histocompatibility 2, class II antigen A, beta 1 (H2-Ab1), mRNA.                                      | NM_207105.2                | 0.38152           |   |
| WBSCR5            | Mus musculus linker for activation of T cells family, member 2 (Lat2), transcript variant 2, mRNA.                 | NM_022964.3                | 0.38344           |   |
| TBL2              | Mus musculus transducin 2 (Tbl2) mRNA.                                                                             |                            | 0.38379           |   |
| E130203B14<br>RIK | Mus musculus RIKEN cDNA E130203B14 gene (E130203B14Rik), mRNA.                                                     | NM_178791.4                | 0.38453           |   |
| NDRG1             | Mus musculus N-myc downstream regulated gene 1 (Ndr1), mRNA.                                                       | NM_008681.2                | 0.38702           | * |
| GALNT9            | Mus musculus UDP-N-acetyl-alpha-D-galactosamine:polypeptide N-acetylgalactosaminyltransferase 9 (Galnt9), mRNA.    | NM_198306.1                | 0.39064           | * |
| IGTP              | Mus musculus interferon gamma induced GTPase (Igt1), mRNA.                                                         | NM_018738.3                | 0.39073           |   |
| CDCA2             | Mus musculus cell division cycle associated 2 (Cdc2), mRNA.                                                        | NM_175384.3                | 0.39254           |   |
| CCNB1             | Mus musculus cyclin B1 (Ccnb1), mRNA.                                                                              | NM_172301.3<br>NM_172301.3 | 0.39272<br>0.4558 |   |

|                   |                                                                                                               |                            |                    |   |
|-------------------|---------------------------------------------------------------------------------------------------------------|----------------------------|--------------------|---|
| SLA               | Mus musculus src-like adaptor (Sla), transcript variant 2, mRNA.                                              | NM_009192.2                | 0.39273            |   |
| FBN1              | Mou musculus fibrillin-1 (Fbn1) mRNA                                                                          |                            | 0.39273            |   |
| PLEK              | Mus musculus pleckstrin (Plek), mRNA.                                                                         | NM_019549.1                | 0.39531            |   |
| IL13RA1           | Mus musculus interleukin 13 receptor, alpha 1 (Il13ra1), mRNA.                                                | NM_133990.4                | 0.39548            |   |
| PDGFRA            | Mus musculus platelet derived growth factor receptor, alpha polypeptide (Pdgfra), transcript variant 1, mRNA. | NM_011058.2                | 0.39649            | * |
| CASP2             | Mus musculus caspase 2 (Casp2), mRNA.                                                                         | NM_007610.1                | 0.39863            |   |
| TNFAIP8           | Mus musculus tumor necrosis factor, alpha-induced protein 8 (Tnfaip8), mRNA.                                  | NM_134131.1                | 0.39963            |   |
| ISGF3G            | Mus musculus interferon regulatory factor 9 (Irf9), mRNA.                                                     | NM_008394.2                | 0.40111            |   |
| RRM1              | Mus musculus ribonucleotide reductase M1 (Rrm1), mRNA.                                                        | NM_009103.2                | 0.40131            |   |
| BC022145          | Mus musculus transmembrane protein 106A (Tmem106a), mRNA.                                                     | NM_144830.3                | 0.4018             |   |
| SYNGR1            | Mus musculus synaptogyrin 1 (Syngr1), transcript variant 1b, mRNA.                                            | NM_009303.2                | 0.40244            |   |
| CH25H             | Mus musculus cholesterol 25-hydroxylase (Ch25h), mRNA.                                                        | NM_009890.1                | 0.40267            |   |
| PIRA3             | Mus musculus paired-Ig-like receptor A3 (Pira3), mRNA.                                                        | NM_011090.1                | 0.40279            |   |
| ZFX1B             | Mus musculus zinc finger E-box binding homeobox 2 (Zeb2), transcript variant 2, mRNA.                         | NM_015753.3                | 0.40296            |   |
| JUNB              | Mus musculus Jun-B oncogene (Junb), mRNA.                                                                     | NM_008416.1                | 0.40376            |   |
| GRN               | Mus musculus granulin (Grn), mRNA.                                                                            | NM_008175.3                | 0.4046             |   |
| NDRL              |                                                                                                               |                            | 0.40565            | * |
| HAT1              | Mus musculus histone aminotransferase 1 (Hat1), mRNA.                                                         | NM_026115.3                | 0.40591            |   |
| ZDHHC14           | Mus musculus zinc finger, DHC domain containing 14 (Zdhhc14), mRNA.                                           | NM_146073.3                | 0.40697            |   |
| PTPN18            | Mus musculus protein tyrosine phosphatase, non-receptor type 18 (Ptpn18), mRNA.                               | NM_011206.2                | 0.40708            |   |
| ATP2A3            | Mus musculus ATPase, Ca <sup>++</sup> transporting, ubiquitous (Atp2a3), mRNA.                                | NM_016745.2                | 0.4074             |   |
| TMSB10            | Mus musculus thymosin, beta 10 (Tmsb10), mRNA.                                                                | NM_025284.3<br>NM_025284.3 | 0.40747<br>0.49716 |   |
| GSTT1             | Mus musculus glutathione S-transferase, theta 1 (Gstt1), mRNA.                                                | NM_008185.2                | 0.40799            |   |
| GP49A             | Mus musculus glycoprotein 49 A (Gp49a), mRNA.                                                                 | NM_008147.1                | 0.40905            |   |
| ADFP              | Mus musculus adipose differentiation related protein (Adfp), mRNA.                                            | NM_007408.3                | 0.40936            |   |
| C1QR1             | Mus musculus CD93 antigen (Cd93), mRNA.                                                                       | NM_010740.3                | 0.40998            |   |
| ARHGAP20          | Mus musculus Rho GTPase activating protein 20 (Arhgap20), mRNA.                                               | NM_175535.3                | 0.41029            | * |
| CHAF1B            | Mus musculus chromatin assembly factor 1, subunit B (p60) (Chaf1b), mRNA.                                     | NM_028083.3                | 0.41039            |   |
| 6330406L22<br>RIK | Mus musculus histocompatibility (minor) HA-1 (Hmha1), mRNA.                                                   | NM_027521.2                | 0.41153            |   |
| ACTB              | Mus musculus actin, beta, cytoplasmic (Actb), mRNA.                                                           | NM_007393.1                | 0.41154            |   |
| E130016E03<br>RIK | Mus musculus RIKEN cDNA E130016E03 gene (E130016E03Rik), mRNA.                                                | NM_0010395<br>56.2         | 0.41212            |   |
| CLSPN             | Mus musculus claspin homolog (Xenopus laevis) (Clspn), mRNA.                                                  | NM_175554.3<br>NM_175554.3 | 0.41361<br>0.49682 |   |
| SAMSN1            | Mus musculus SAM domain, SH3 domain and nuclear localization signals, 1 (Samsn1), mRNA.                       | NM_023380.2                | 0.41591            |   |
| KLHL6             | Mus musculus kelch-like 6 (Drosophila) (Klhl6), mRNA.                                                         | NM_183390.1<br>NM_183390.1 | 0.4164<br>0.48716  |   |
| ARHGAP18          | Mus musculus Rho GTPase activating protein 18 (Arhgap18), mRNA.                                               | NM_176837.2                | 0.41644            |   |
| GBP4              | Mus musculus guanylate binding protein 3 (Gbp3), mRNA.                                                        | NM_018734.3<br>NM_018734.2 | 0.41726<br>0.44809 |   |
| MAD2L1            | Mus musculus MAD2 (mitotic arrest deficient, homolog)-like 1 (yeast) (Mad2l1), mRNA.                          | NM_019499.2                | 0.41746            |   |
| 6430706D22<br>RIK | Mus musculus RIKEN cDNA 6430706D22 gene (6430706D22Rik), mRNA.                                                | NM_198652.1                | 0.41791            |   |
| PTPRO             | Mus musculus protein tyrosine phosphatase, receptor type, O (Ptpro), mRNA.                                    | NM_011216.2                | 0.41865            |   |

|                   |                                                                                                                                 |                                          |                   |  |
|-------------------|---------------------------------------------------------------------------------------------------------------------------------|------------------------------------------|-------------------|--|
| ARRDC4            | Mus musculus arrestin domain containing 4 (Arrdc4), transcript variant 1, mRNA.                                                 | NM_0010425<br>92.2                       | 0.41884           |  |
| H2-GS17           | Mus musculus predicted gene, EG667977 (EG667977), mRNA.                                                                         | NM_0010810<br>32.1                       | 0.41928           |  |
| FCGR2B            | Mus musculus Fc receptor, IgG, low affinity IIb (Fcgr2b), transcript variant 2, mRNA.                                           | NM_010187.2                              | 0.42161           |  |
| ARHGDIB           | Mus musculus Rho, GDP dissociation inhibitor (GDI) beta (Arhgdib), mRNA.                                                        | NM_007486.1                              | 0.42174           |  |
| 5430400N05<br>RIK | Mus musculus zinc finger protein 710 (Zfp710), mRNA.                                                                            | NM_175433.4                              | 0.42278           |  |
| RIS2              | Mus musculus chromatin licensing and DNA replication factor 1 (Cdt1), mRNA.                                                     | NM_026014.3                              | 0.42286           |  |
| MBC2              | Mus musculus membrane bound C2 domain containing protein (Mbc2), mRNA.                                                          | NM_011843.2                              | 0.42419           |  |
| EGFR              | Mus musculus epidermal growth factor receptor (Egfr), transcript variant 1, mRNA.                                               | NM_207655.2                              | 0.42472           |  |
| 3632451O06<br>RIK | Mus musculus RIKEN cDNA 3632451O06 gene (3632451O06Rik), mRNA.                                                                  | NM_026142.1                              | 0.42621           |  |
| SMPDL3B           | Mus musculus sphingomyelin phosphodiesterase, acid-like 3B (Smpdl3b), mRNA.                                                     | NM_133888.2                              | 0.42669           |  |
| PIRA11            | Mus musculus paired-Ig-like receptor A11 (Pira11), mRNA.                                                                        | NM_011088.1                              | 0.42732           |  |
| H2-T23            | Mus musculus histocompatibility 2, T region locus 23 (H2-T23), mRNA.                                                            | NM_010398.1                              | 0.42843           |  |
| BC025872          | Mus musculus RCSD domain containing 1 (Rcsd1), transcript variant 1, mRNA.                                                      | NM_178593.3                              | 0.42847           |  |
| GPX7              | Mus musculus glutathione peroxidase 7 (Gpx7), mRNA.                                                                             | NM_024198.3                              | 0.42906           |  |
| AW491445          | Mus musculus solute carrier family 25, member 45 (Slc25a45), mRNA.                                                              | NM_134154.3                              | 0.43047           |  |
| D12ERTD647<br>E   | Mus musculus DNA segment, Chr 12, ERATO Doi 647, expressed (D12ErtD647e), transcript variant 5, mRNA.                           | NM_194069.1                              | 0.43143           |  |
| D12ERTD647<br>E   | Mus musculus DNA segment, Chr 12, ERATO Doi 647, expressed (D12ErtD647e), transcript variant 4, mRNA.                           | NM_194068.1                              | 0.4316            |  |
| BC025206          | Mus musculus UDP-GlcNAc:betaGal beta-1,3-N-acetylglucosaminyltransferase 8 (B3gnt8), transcript variant 1, mRNA.                | NM_146184.4                              | 0.43223           |  |
| NCAPD2            | Mus musculus non-SMC condensin I complex, subunit D2 (Ncapd2), mRNA.                                                            | NM_146171.1                              | 0.4325            |  |
| QPCT              | Mus musculus glutaminyl-peptide cyclotransferase (glutaminyl cyclase) (Qpct), mRNA.                                             | NM_027455.1                              | 0.43283           |  |
| PRKR              | Mus musculus eukaryotic translation initiation factor 2-alpha kinase 2 (Eif2ak2), mRNA.                                         | NM_011163.3                              | 0.43311           |  |
| PSD4              | Mus musculus pleckstrin and Sec7 domain containing 4 (Psd4), mRNA.                                                              | NM_177611.3                              | 0.43423           |  |
| PIK3R1            | Mus musculus phosphatidylinositol 3-kinase, regulatory subunit, polypeptide 1 (p85 alpha) (Pik3r1), transcript variant 2, mRNA. | NM_0010774<br>95.1<br>NM_0010249<br>55.1 | 0.43484<br>0.4383 |  |
| CSRP2             | Mus musculus cysteine and glycine-rich protein 2 (Csrp2), mRNA.                                                                 | NM_007792.3                              | 0.4354            |  |
| IRAK3             | Mus musculus interleukin-1 receptor-associated kinase 3 (Irak3), mRNA.                                                          | NM_028679.3                              | 0.43703           |  |
| YWHAH             | Mus musculus tyrosine 3-monooxygenase/tryptophan 5-monooxygenase activation protein, eta polypeptide (Ywhah), mRNA.             | NM_011738.1                              | 0.43719           |  |
| 2610039C10<br>RIK | Mus musculus RIKEN cDNA 2610039C10 gene (2610039C10Rik), mRNA.                                                                  | NM_025642.1                              | 0.43726           |  |
| CRYL1             | Mus musculus crystallin, lambda 1 (Cryl1), mRNA.                                                                                | NM_030004.2                              | 0.43785           |  |
| PAFAH1B3          | Mus musculus platelet-activating factor acetylhydrolase, isoform 1b, alpha1 subunit (Pafah1b3), mRNA.                           | NM_008776.1                              | 0.43863           |  |
| E2F2              | Mus musculus E2F transcription factor 2 (E2f2), mRNA.                                                                           | NM_177733.2                              | 0.43876           |  |
| H2-AB1            | Mus musculus histocompatibility 2, class II antigen A, beta 1 (H2-Ab1), mRNA.                                                   | NM_207105.1                              | 0.43886           |  |
| BLVRB             | Mus musculus biliverdin reductase B (flavin reductase (NADPH)) (Blvrb), mRNA.                                                   | NM_144923.2                              | 0.44301           |  |
| UGT1A10           | Mus musculus UDP glycosyltransferase 1 family, polypeptide A10 (Ugt1a10), mRNA.                                                 | NM_201641.1                              | 0.44321           |  |
| TLR2              | Mus musculus toll-like receptor 2 (Tlr2), mRNA.                                                                                 | NM_011905.2                              | 0.44374           |  |
| PIRA11            | Mus musculus paired-Ig-like receptor A11 (Pira11), mRNA.                                                                        | NM_011088.1                              | 0.44432           |  |
| AATK              | Mus musculus apoptosis-associated tyrosine kinase (Aatk), mRNA.                                                                 | NM_007377.3                              | 0.44451           |  |

|                   |                                                                                                                                                                              |                            |                    |   |
|-------------------|------------------------------------------------------------------------------------------------------------------------------------------------------------------------------|----------------------------|--------------------|---|
| GPR23             | Mus musculus G protein-coupled receptor 23 (Gpr23), mRNA.                                                                                                                    | NM_175271.2                | 0.44472            | * |
| 2310006J04R<br>IK | Mus musculus ankyrin repeat domain 37 (Ankrd37), mRNA.                                                                                                                       | NM_0010395<br>62.1         | 0.4462             | * |
| SLC8A1            | Mus musculus solute carrier family 8, member 1 (Slc8a1) mRNA.                                                                                                                | NM_011406.1                | 0.44715            |   |
| ENTPD2            | Mus musculus ectonucleoside triphosphate diphosphohydrolase 2 (Entpd2), mRNA.                                                                                                | NM_009849.1                | 0.44719            | * |
| LY6E              | Mus musculus lymphocyte antigen 6 complex, locus E (Ly6e), mRNA.                                                                                                             | NM_008529.2                | 0.4483             |   |
| COL1A2            | Mus musculus collagen, type I, alpha 2 (Col1a2), mRNA.                                                                                                                       | NM_007743.2                | 0.44881            |   |
| STAT1             | Mus musculus signal transducer and activator of transcription 1 (Stat1), mRNA.                                                                                               | NM_009283.3                | 0.44883            |   |
| ANPEP             | Mus musculus alanyl (membrane) aminopeptidase (Anpep), mRNA.                                                                                                                 | NM_008486.1                | 0.44893            |   |
| CRIM2             | Mus musculus cysteine rich BMP regulator 2 (chordin like) (Crim2), mRNA.                                                                                                     | NM_0010299<br>85.1         | 0.45255            |   |
| PALMD             | Mus musculus palmdelphin (Palmd), mRNA.                                                                                                                                      | NM_023245.3                | 0.45351            |   |
| COL6A1            | Mus musculus procollagen, type VI, alpha 1 (Col6a1), mRNA.                                                                                                                   | NM_009933.2                | 0.45375            |   |
| ATF3              | Mus musculus activating transcription factor 3 (Atf3), mRNA.                                                                                                                 | NM_007498.2                | 0.45377            |   |
| EG630499          | Mus musculus predicted gene, EG630499 (EG630499), mRNA.                                                                                                                      | NM_0010810<br>15.1         | 0.45424            |   |
| CDK2              | Mus musculus cyclin-dependent kinase 2 (Cdk2), transcript variant 1, mRNA.                                                                                                   | NM_183417.2                | 0.45534            |   |
| POLD1             | Mus musculus polymerase (DNA directed), delta 1, catalytic subunit (Pold1), mRNA.                                                                                            | NM_011131.2                | 0.45547            |   |
| RGMA              | Mus musculus RGM domain family, member A (Rgma), mRNA.                                                                                                                       | NM_177740.4                | 0.45559            |   |
| UBTD2             | Mus musculus ubiquitin domain containing 2 (Ubt2), mRNA.                                                                                                                     | NM_173784.3                | 0.45603            |   |
| GNG2              | Mus musculus guanine nucleotide binding protein (G protein), gamma 2 (Gng2), transcript variant 2, mRNA.                                                                     | NM_0010386<br>37.1         | 0.45677            |   |
| IDH2              | Mus musculus isocitrate dehydrogenase 2 (NADP+), mitochondrial (Idh2), nuclear gene encoding mitochondrial protein, mRNA.                                                    | NM_173011.1                | 0.45765            |   |
| ARHGEF3           | Mus musculus Rho guanine nucleotide exchange factor (GEF) 3 (Arhgef3), mRNA.                                                                                                 | NM_027871.1                | 0.45841            |   |
| EGR1              | Mus musculus early growth response 1 (Egr1), mRNA.                                                                                                                           | NM_007913.5                | 0.46033            |   |
| PIP5K2A           | Mus musculus phosphatidylinositol-5-phosphate 4-kinase, type II, alpha (Pip4k2a), mRNA.                                                                                      | NM_008845.4                | 0.46102            |   |
| H3F3A             | Mus musculus H3 histone, family 3A (H3f3a), mRNA.                                                                                                                            | NM_008210.2                | 0.4611             |   |
| LOC434858         | Mus musculus predicted gene, EG434858 (EG434858), non-coding RNA.                                                                                                            | NR_002883.1                | 0.46112            |   |
| TLE4              | Mus musculus transducin-like enhancer of split 4, homolog of Drosophila E(spl) (Tle4), mRNA. XM_924093 XM_924097 XM_924099 XM_924101 XM_924105 XM_924108 XM_924112 XM_924118 | NM_011600.2                | 0.46113            |   |
| BTG1              | PREDICTED: Mus musculus similar to myocardial vascular inhibition factor (LOC100047353), mRNA.                                                                               | XM_00147796<br>3.1         | 0.46118            |   |
| JMJD2B            | Mus musculus jumonji domain containing 2B (Jmjd2b), mRNA.                                                                                                                    | NM_172132.1                | 0.46147            |   |
| ADCY2             | Mus musculus adenylate cyclase 2 (Adcy2), mRNA.                                                                                                                              | NM_153534.2                | 0.46347            |   |
| PROS1             | Mus musculus protein S (alpha) (Pros1), mRNA.                                                                                                                                | NM_011173.2                | 0.46376            |   |
| PTGDS2            | Mus musculus prostaglandin D2 synthase 2, hematopoietic (Ptgds2), mRNA.                                                                                                      | NM_019455.2                | 0.46545            |   |
| CAR13             | Mus musculus carbonic anhydrase 13 (Car13), mRNA.                                                                                                                            | NM_024495.4                | 0.46565            |   |
| BC004728          |                                                                                                                                                                              | NM_174992.2                | 0.46638            |   |
| ITGA11            | Mus musculus integrin alpha 11 (Itga11), mRNA.                                                                                                                               | NM_176922.4<br>NM_176922.4 | 0.46692<br>0.48869 |   |
| IRF5              | Mus musculus interferon regulatory factor 5 (Irf5), mRNA.                                                                                                                    | NM_012057.3                | 0.46711            |   |
| GLIPR2            | Mus musculus GLI pathogenesis-related 2 (Glipr2), mRNA.                                                                                                                      | NM_027450.3                | 0.46797            |   |
| SNX24             | Mus musculus sorting nexin 24 (Snx24), mRNA.                                                                                                                                 | NM_029394.3                | 0.46839            |   |
| COL14A1           | Mus musculus collagen, type XIV, alpha 1 (Col14a1), mRNA.                                                                                                                    | NM_181277.2                | 0.46846            |   |
| BST2              | Mus musculus bone marrow stromal cell antigen 2 (Bst2), mRNA.                                                                                                                | NM_198095.2                | 0.4693             |   |

|                   |                                                                                                                                            |                               |                    |   |
|-------------------|--------------------------------------------------------------------------------------------------------------------------------------------|-------------------------------|--------------------|---|
| CASP4             | Mus musculus caspase 4, apoptosis-related cysteine peptidase (Casp4), mRNA.                                                                | NM_007609.1                   | 0.47004            |   |
| MBP               | Mus musculus myelin basic protein (Mbp), transcript variant 8, mRNA.                                                                       | NM_001025245.1                | 0.47054            |   |
| SKAP2             | Mus musculus src family associated phosphoprotein 2 (Skap2), mRNA.                                                                         | NM_018773.2                   | 0.471              |   |
| NAV1              | Mus musculus neuron navigator 1 (Nav1), mRNA.                                                                                              | NM_173437.1                   | 0.47124            |   |
| GM885             | Mus musculus gene model 885, (NCBI) (Gm885), mRNA.                                                                                         | NM_001033435.1                | 0.4713             |   |
| CCL12             | PREDICTED: Mus musculus similar to monocyte chemoattractant protein-5, transcript variant 1 (LOC100048556), mRNA.                          | XM_001480891.1                | 0.47144            |   |
| EGR2              | Mus musculus early growth response 2 (Egr2), mRNA.                                                                                         | NM_010118.1                   | 0.4715             |   |
| RHOE              | Mus musculus Rho family GTPase 3 (Rnd3), mRNA.                                                                                             | NM_028810.2                   | 0.47243            |   |
| FCNA              | Mus musculus ficolin A (Fcna), mRNA.                                                                                                       | NM_007995.3                   | 0.47271            |   |
| MCC               | Mus musculus mutated in colorectal cancers (Mcc), mRNA.                                                                                    | NM_001033406.1                | 0.47357            |   |
| FBLIM1            | Mus musculus filamin binding LIM protein 1 (Fblim1), mRNA.                                                                                 | NM_133754.3                   | 0.4738             |   |
| GNGT2             | Mus musculus guanine nucleotide binding protein (G protein), gamma transducing activity polypeptide 2 (Gngt2), transcript variant 2, mRNA. | NM_001038664.2                | 0.47384            |   |
| MMP3              | Mus musculus matrix metalloproteinase 3 (Mmp3), mRNA.                                                                                      | NM_010809.1                   | 0.47405            |   |
| CLU               | PREDICTED: Mus musculus similar to clusterin (LOC100046120), mRNA.                                                                         | XM_001475611.1                | 0.47421            | * |
| D730019B10<br>RIK | Mus musculus zinc finger CCCH type containing 12D (Zc3h12d), mRNA.                                                                         | NM_172785.2                   | 0.47438            |   |
| EG433016          | Mus musculus predicted gene, EG433016 (EG433016), mRNA.                                                                                    | NM_001082547.1                | 0.4744             |   |
| PRKCDBP           | Mus musculus protein kinase C, delta binding protein (Prkcdbp), mRNA.                                                                      | NM_028444.1                   | 0.47443            |   |
| ST5               | Mus musculus suppression of tumorigenicity 5 (St5), transcript variant 1, mRNA.                                                            | NM_001001326.1<br>NM_029811.2 | 0.47471<br>0.49405 |   |
| PRICKLE1          | Mus musculus prickle like 1 (Drosophila) (Prickle1), mRNA.                                                                                 | NM_001033217.3                | 0.47491            |   |
| TPM3              | Mus musculus tropomyosin 3, gamma (Tpm3), mRNA.                                                                                            | NM_022314.2                   | 0.47569            |   |
| IL7R              | Mus musculus interleukin 7 receptor (Il7r), mRNA.                                                                                          | NM_008372.3                   | 0.47571            |   |
| RAET1B            | Mus musculus retinoic acid early transcript beta (Raet1b), mRNA.                                                                           | NM_009017.1                   | 0.47675            |   |
| SAA3              | Mus musculus serum amyloid A 3 (Saa3), mRNA.                                                                                               | NM_011315.3                   | 0.47694            |   |
| GSTK1             | Mus musculus glutathione S-transferase kappa 1 (Gstk1), mRNA.                                                                              | NM_029555.2                   | 0.47789            |   |
| UGCG              | Mus musculus UDP-glucose ceramide glucosyltransferase (Ugcg), mRNA.                                                                        | NM_011673.2                   | 0.47796            |   |
| AP2B1             | Mus musculus adaptor-related protein complex 2, beta 1 subunit (Ap2b1), transcript variant 1, mRNA.                                        | NM_001035854.2                | 0.47975            |   |
| BC003277          | Mus musculus transmembrane protein 51 (Tmem51), mRNA.                                                                                      | NM_145402.3                   | 0.48               |   |
| BZW2              | Mus musculus basic leucine zipper and W2 domains 2 (Bzw2), mRNA.                                                                           | NM_025840.2                   | 0.48078            |   |
| 2010005H15<br>RIK | Mus musculus RIKEN cDNA 2010005H15 gene (2010005H15Rik), mRNA.                                                                             | NM_029733.2                   | 0.48083            |   |
| ZCCHC5            | Mus musculus zinc finger, CCHC domain containing 5 (Zcchc5), mRNA.                                                                         | NM_199468.1                   | 0.48132            | * |
| 5133400G04<br>RIK | Mus musculus RIKEN cDNA 5133400G04 gene (5133400G04Rik), transcript variant 2, mRNA.                                                       | NM_029485.1                   | 0.48307            |   |
| 5133400G04<br>RIK | Mus musculus RIKEN cDNA 5133400G04 gene (5133400G04Rik), transcript variant 2, mRNA.                                                       | NM_029485.1                   | 0.48331            |   |
| CDC7              | Mus musculus cell division cycle 7 (S. cerevisiae) (Cdc7), mRNA.                                                                           | NM_009863.2                   | 0.48349            |   |
| TM6SF1            | Mus musculus transmembrane 6 superfamily member 1 (Tm6sf1), mRNA.                                                                          | NM_145375.1                   | 0.48433            |   |
| BAT1A             | Mus musculus HLA-B-associated transcript 1A (Bat1a), mRNA.                                                                                 | NM_019693.2                   | 0.48514            |   |
| PNP               | PREDICTED: Mus musculus similar to purine nucleoside phosphorylase (LOC100045567), mRNA.                                                   | XM_001474536.1                | 0.48626            |   |
| MFAP4             | Mus musculus microfibrillar-associated protein 4 (Mfap4), mRNA.                                                                            | NM_029568.2                   | 0.48718            |   |

|                   |                                                                                                                                                                            |                |         |   |
|-------------------|----------------------------------------------------------------------------------------------------------------------------------------------------------------------------|----------------|---------|---|
| ENO1              | Mus musculus enolase 1, alpha non-neuron (Eno1), mRNA.                                                                                                                     | NM_023119.1    | 0.4872  | * |
| OSMR              | Mus musculus oncostatin M receptor (Osmr), mRNA.                                                                                                                           | NM_011019.1    | 0.48807 |   |
| TNFAIP8L2         | Mus musculus tumor necrosis factor, alpha-induced protein 8-like 2 (Tnfaip8l2), mRNA.                                                                                      | NM_027206.1    | 0.48985 |   |
| PDZRN3            | Mus musculus PDZ domain containing RING finger 3 (Pdzn3), mRNA.                                                                                                            | NM_018884.1    | 0.48992 |   |
| TRPV2             | Mus musculus transient receptor potential cation channel, subfamily V, member 2 (Trpv2), mRNA.                                                                             | NM_011706.1    | 0.49065 |   |
| WSB1              | Mus musculus WD repeat and SOCS box-containing 1 (Wsb1), transcript variant 2, mRNA.                                                                                       | NM_001042565.2 | 0.49111 |   |
| STAB1             | Mus musculus stabilin 1 (Stab1), mRNA.                                                                                                                                     | NM_138672.2    | 0.49287 |   |
| ALDOA             | Mus musculus aldolase A, fructose-bisphosphate (Aldoa), mRNA.                                                                                                              | NM_007438.3    | 0.49416 | * |
| IL1RN             | Mus musculus interleukin 1 receptor antagonist (Il1rn), transcript variant 1, mRNA.                                                                                        | NM_031167.3    | 0.49519 |   |
| SNX2              | Mus musculus sorting nexin 2 (Snx2), mRNA.                                                                                                                                 | NM_026386.1    | 0.49573 |   |
| SSR2              | Mus musculus signal sequence receptor, beta (Ssr2), mRNA.                                                                                                                  | NM_025448.2    | 0.49652 |   |
| 2810046M22<br>RIK |                                                                                                                                                                            | NM_026621.1    | 0.49761 | * |
| ZFP608            | Mus musculus zinc finger protein 608 (Zfp608), mRNA. XM_001000874<br>XM_001000888 XM_001000902 XM_001000914 XM_993937 XM_993952<br>XM_993993 XM_994038 XM_994057 XM_994076 | NM_175751.3    | 0.49809 |   |
| TPI1              | Mus musculus triosephosphate isomerase 1 (Tpi1), mRNA.                                                                                                                     | NM_009415.1    | 0.49815 |   |
| RAB32             | Mus musculus RAB32, member RAS oncogene family (Rab32), mRNA.                                                                                                              | NM_026405.3    | 0.49837 |   |
| CSNK1D            | Mus musculus casein kinase 1, delta (Csnk1d), transcript variant 2, mRNA.                                                                                                  | NM_027874.2    | 0.49875 |   |
| TUBA1A            | Mus musculus tubulin, alpha 1A (Tuba1a), mRNA.                                                                                                                             | NM_011653.1    | 0.49881 |   |
| PAOX              | Mus musculus polyamine oxidase (exo-N4-amino) (Paox), mRNA.                                                                                                                | NM_153783.2    | 0.49926 |   |
