# Supplementary material for: The Role of Parathyroid Hormone-Related Protein (PTHrP) in Osteoblast Response to Microgravity: Mechanistic Implications for Osteoporosis Development
Source: PubMed Central journal article supplement (PMC4963112; doi:10.1371/journal.pone.0160034), 2016-07-27
Supplement: pone.0160034.s005.pdf [file pone.0160034.s005.pdf]

**S4 A and B tables: Genes (163) affected by PTHrP<sub>1-36</sub> treatment.**

**S4 A Table: Genes (102) upregulated by PTHrP<sub>1-36</sub> treatment. Fold change > 1.5, p value < 0.05**

| Target ID     | Definition (all probes: <i>Mus musculus</i> )                                                                | RefSeq ID      | Fold change | Down regulated by both Og and ablation |
|---------------|--------------------------------------------------------------------------------------------------------------|----------------|-------------|----------------------------------------|
| RBM3          | PREDICTED: similar to RNA binding motif protein 3 (LOC100043257), mRNA.                                      | XM_001480197.1 | 3.3167      | *                                      |
| HIST1H2AD     | histone cluster 1, H2ad (Hist1h2ad), mRNA.                                                                   | NM_178188.3    | 3.0702      | *                                      |
| HIST1H2AH     | histone cluster 1, H2ah (Hist1h2ah), mRNA.                                                                   | NM_175659.1    | 2.6444      | *                                      |
| HIST1H2AN     | histone cluster 1, H2an (Hist1h2an), mRNA.                                                                   | NM_178184.1    | 2.6297      | *                                      |
| HIST1H2AK     | histone cluster 1, H2ak (Hist1h2ak), mRNA.                                                                   | NM_178183.1    | 2.6191      | *                                      |
| PTN           | pleiotrophin (Ptn), mRNA.                                                                                    | NM_008973.2    | 2.6102      | *                                      |
| HIST1H2AF     | histone cluster 1, H2af (Hist1h2af), mRNA.                                                                   | NM_175661.1    | 2.5906      | *                                      |
| HIST1H2AO     | histone cluster 1, H2ao (Hist1h2ao), mRNA.                                                                   | NM_178185.1    | 2.3636      | *                                      |
| CDCA3         | cell division cycle associated 3 (Cdca3), mRNA.                                                              | NM_013538.4    | 2.2954      |                                        |
| 2310061N23RIK | interferon, alpha-inducible protein 27 (Ifi27), mRNA.                                                        | NM_029803.1    | 2.24        | *                                      |
|               |                                                                                                              | NM_023223.1    | 2.2371      |                                        |
| CDC20         | cell division cycle 20 homolog ( <i>S. cerevisiae</i> ) (Cdc20), mRNA.                                       | NM_023223.1    | 1.6896      |                                        |
|               |                                                                                                              | NM_023223.1    | 1.6657      |                                        |
| CENPA         | centromere protein A (Cenpa), mRNA.                                                                          | NM_007681.2    | 2.2172      | *                                      |
| HIST1H2AG     | histone cluster 1, H2ag (Hist1h2ag), mRNA.                                                                   | NM_178186.2    | 2.186       | *                                      |
| LUM           | lumican (Lum), mRNA.                                                                                         | NM_008524.1    | 2.1278      | *                                      |
|               |                                                                                                              | NM_009689.1    | 2.0974      |                                        |
| BIRC5         | baculoviral IAP repeat-containing 5 (Birc5), transcript variant 1, mRNA.                                     | NM_009689.2    | 1.9794      |                                        |
|               |                                                                                                              | NM_009689.2    | 1.7963      |                                        |
| ITM2A         | integral membrane protein 2A (Itm2a), mRNA.                                                                  | NM_008409.2    | 2.0722      | *                                      |
| IGFBP5        | insulin-like growth factor binding protein 5 (Igfbp5), mRNA.                                                 | NM_010518.2    | 2.0686      | *                                      |
|               |                                                                                                              | NM_007833.4    | 2.0663      |                                        |
| DCN           | decorin (Dcn), mRNA.                                                                                         | NM_007833.4    | 1.7317      | *                                      |
| D0H4S114      | DNA segment, human D4S114 (D0H4S114), mRNA.                                                                  | NM_053078.3    | 2.0484      |                                        |
| HAGHL         | hydroxyacylglutathione hydrolase-ike (Haghl) mRNA                                                            |                | 2.0424      |                                        |
| PLK1          | polo-like kinase 1 ( <i>Drosophila</i> ) (Plk1), mRNA.                                                       | NM_011121.3    | 2.0252      |                                        |
| KIF22         | kinesin family member 22 (Kif22), mRNA.                                                                      | NM_145588.1    | 1.9758      |                                        |
| 2700094K13RIK | RIKEN cDNA 2700094K13 gene (2700094K13Rik), transcript variant 2, mRNA.                                      | NM_001037279.1 | 1.931       |                                        |
| HIST2H2AC     | histone cluster 2, H2ac (Hist2h2ac), mRNA.                                                                   | NM_175662.1    | 1.8885      |                                        |
| 1500015010RIK | RIKEN cDNA 1500015010 gene (1500015010Rik), mRNA.                                                            | NM_024283.2    | 1.8607      | *                                      |
| ANLN          | anillin, actin binding protein (Anln), mRNA.                                                                 | NM_028390.2    | 1.858       |                                        |
| NUSAP1        | nucleolar and spindle associated protein 1 (Nusap1), transcript variant 2, mRNA.                             | NM_001042652.1 | 1.856       |                                        |
| PRC1          | protein regulator of cytokinesis 1 (Prc1), mRNA.                                                             | NM_145150.1    | 1.8457      |                                        |
| IDH2          | isocitrate dehydrogenase 2 (NADP+), mitochondrial (Idh2), nuclear gene encoding mitochondrial protein, mRNA. | NM_173011.1    | 1.8455      |                                        |
|               |                                                                                                              | NM_008546.2    | 1.8433      |                                        |
| MFAP2         | microfibrillar-associated protein 2 (Mfap2), mRNA.                                                           | NM_008546.2    | 1.5754      |                                        |
|               |                                                                                                              | NM_008546.2    | 1.5018      | *                                      |
| TK1           | thymidine kinase 1 (Tk1), mRNA.                                                                              | NM_009387.1    | 1.8403      |                                        |
| ALOX5AP       | arachidonate 5-lipoxygenase activating protein (Alox5ap), mRNA.                                              | NM_009663.1    | 1.8329      |                                        |
| UHRF1         | ubiquitin-like, containing PHD and RING finger domains, 1 (Uhrf1), mRNA.                                     | NM_010931.2    | 1.8282      |                                        |
| MCM5          | minichromosome maintenance deficient 5, cell division cycle 46 ( <i>S. cerevisiae</i> ) (Mcm5), mRNA.        | NM_008566.2    | 1.8226      |                                        |
| CDKN1C        | cyclin-dependent kinase inhibitor 1C (P57) (Cdkn1c), mRNA.                                                   | NM_009876.3    | 1.7975      |                                        |
| 5133400G04RIK | RIKEN cDNA 5133400G04 gene (5133400G04Rik), transcript variant 2, mRNA.                                      | NM_029485.1    | 1.7715      |                                        |
| ELMO1         | engulfment and cell motility 1, ced-12 homolog ( <i>C. elegans</i> ) (Elmo1), transcript variant 2, mRNA.    | NM_198093.2    | 1.731       |                                        |

|               |                                                                                                                    |                |        |   |
|---------------|--------------------------------------------------------------------------------------------------------------------|----------------|--------|---|
| GPR23         | G protein-coupled receptor 23 (Gpr23), mRNA.                                                                       | NM_175271.2    | 1.7145 |   |
| SLAMF9        | SLAM family member 9 (Slamf9), mRNA.                                                                               | NM_029612.3    | 1.71   |   |
| STK6          | aurora kinase A (Aurka), mRNA.                                                                                     | NM_011497.3    | 1.6983 |   |
| H2AFZ         | H2A histone family, member Z (H2afz), mRNA.                                                                        | NM_016750.1    | 1.6962 |   |
| CAPN6         | calpain 6 (Capn6), mRNA.                                                                                           | NM_007603.2    | 1.6952 |   |
| CD52          | CD52 antigen (Cd52), mRNA.                                                                                         | NM_013706.1    | 1.6884 | * |
| C1QA          | complement component 1, q subcomponent, alpha polypeptide (C1qa), mRNA.                                            | NM_007572.2    | 1.6858 | * |
| CTSC          | cathepsin C (Ctsc), mRNA.                                                                                          | NM_009982.2    | 1.6839 | * |
| ALDH3B1       | aldehyde dehydrogenase 3 family, member B1 (Aldh3b1), mRNA.                                                        | NM_026316.2    | 1.678  | * |
| OGN           | osteo glycin (Ogn), mRNA.                                                                                          | NM_008760.2    | 1.6716 |   |
| TGFB1         | transforming growth factor, beta induced (Tgfb1), mRNA.                                                            | NM_009369.1    | 1.6641 | * |
| FMO1          | flavin containing monooxygenase 1 (Fmo1), mRNA.                                                                    | NM_010231.2    | 1.6578 | * |
| IGF2          | insulin-like growth factor 2 (Igf2), mRNA.                                                                         | NM_010514.2    | 1.6563 | * |
|               |                                                                                                                    | NM_009898.2    | 1.6563 |   |
| CORO1A        | coronin, actin binding protein 1A (Coro1a), mRNA.                                                                  | NM_009898.2    | 1.6294 |   |
|               |                                                                                                                    | NM_009898.2    | 1.6205 |   |
| MCM6          | minichromosome maintenance deficient 6 (MIS5 homolog, S. pombe) (S. cerevisiae) (Mcm6), mRNA.                      | NM_008567.1    | 1.6556 |   |
| SPAG5         | sperm associated antigen 5 (Spag5), mRNA.                                                                          | NM_017407.1    | 1.6556 |   |
| CYP7B1        | cytochrome P450, family 7, subfamily b, polypeptide 1 (Cyp7b1), mRNA.                                              | NM_007825.3    | 1.6527 | * |
| NRM           | nurim (nuclear envelope membrane protein) (Nrm), mRNA.                                                             | NM_134122.2    | 1.6419 |   |
| CDCA2         | cell division cycle associated 2 (Cdc2a), mRNA.                                                                    | NM_175384.3    | 1.6403 |   |
| CRABP1        | cellular retinoic acid binding protein I (Crabp1), mRNA.                                                           | NM_013496.2    | 1.6401 |   |
| TYMS          | thymidylate synthase (Tyms), mRNA.                                                                                 | NM_021288.3    | 1.6377 |   |
| CXCL12        | chemokine (C-X-C motif) ligand 12 (Cxcl12) mRNA.                                                                   | NM_013655.2    | 1.6375 | * |
| LDB2          | LIM domain-binding 2 (Ldb2) mRNA.                                                                                  | NM_010698.2    | 1.635  | * |
| EMR1          | EGF-like module containing, mucin-like, hormone receptor-like sequence 1 (Emr1), mRNA.                             | NM_010130.3    | 1.6262 | * |
| P2RY6         | pyrimidineric receptor P2Y, G-protein coupled, 6 (P2ry6), mRNA.                                                    | NM_183168.1    | 1.6111 |   |
| 4632417K18RIK | RIKEN cDNA 4632417K18 gene (4632417K18Rik), mRNA.                                                                  | NM_026640.2    | 1.606  |   |
| LRRC15        | leucine-rich repeat containing 15 (Lrrc15) mRNA.                                                                   | XM_358823.1    | 1.6042 |   |
| KNG1          | kininogen 1 (Kng1), mRNA.                                                                                          | NM_023125.2    | 1.5999 | * |
| OLFML1        | olfactomedin-like 1 (Olfml1), mRNA.                                                                                | NM_172907.2    | 1.5997 | * |
| PBK           | PDZ binding kinase (Pbk), mRNA.                                                                                    | NM_023209.1    | 1.5995 |   |
| AOC3          | amine oxidase, copper containing 3 (Aoc3), mRNA.                                                                   | NM_009675.1    | 1.5983 | * |
|               |                                                                                                                    | NM_022024.2    | 1.5966 |   |
| GMFG          | glia maturation factor, gamma (Gmfg), transcript variant 1, mRNA.                                                  | NM_022024.2    | 1.5325 | * |
| NCF4          | neutrophil cytosolic factor 4 (Ncf4), mRNA.                                                                        | NM_008677.1    | 1.5936 | * |
| SFRP2         | secreted frizzled-related protein 2 (Sfrp2), mRNA.                                                                 | NM_009144.1    | 1.5892 | * |
| CSRP2         | cysteine and glycine-rich protein 2 (Csrp2), mRNA.                                                                 | NM_007792.3    | 1.5844 |   |
| SMPDL3B       | sphingomyelin phosphodiesterase, acid-like 3B (Smpdl3b), mRNA.                                                     | NM_133888.2    | 1.582  |   |
| SMARCA1       | SWI/SNF related, matrix associated, actin dependent regulator of chromatin, subfamily a, member 1 (Smarca1), mRNA. | NM_053123.3    | 1.5706 |   |
| 2810417H13RIK | RIKEN cDNA 2810417H13 gene (2810417H13Rik), mRNA.                                                                  | NM_026515.2    | 1.5684 |   |
| CDC2A         | cell division cycle 2 homolog A (S. pombe) (Cdc2a), mRNA.                                                          | NM_007659.3    | 1.5683 |   |
| SIRPB1        | signal-regulatory protein beta 1 (Sirpb1), transcript variant 3, mRNA.                                             | NM_001002898.1 | 1.5595 | * |
| RASSF4        | Ras association (RalGDS/AF-6) domain family member 4 (Rassf4), mRNA.                                               | NM_178045.3    | 1.5588 |   |
|               |                                                                                                                    | NM_178045.3    | 1.5215 | * |
| COL1A2        | collagen, type I, alpha 2 (Col1a2), mRNA.                                                                          | NM_007743.2    | 1.5571 |   |
| KCNAB2        | potassium voltage-gated channel, shaker-related subfamily, beta member 2 (Kcnab2), mRNA.                           | NM_010598.2    | 1.5566 | * |
| LOC434858     | predicted gene, EG434858 (EG434858), non-coding RNA.                                                               | NR_002883.1    | 1.556  |   |
| LSP1          | PREDICTED: predicted gene, ENSMUSG00000043795 (ENSMUSG00000043795), mRNA.                                          | XM_001480835.1 | 1.5468 |   |
| ARL11         | ADP-ribosylation factor-like 11 (Arl11), mRNA.                                                                     | NM_177337.3    | 1.544  |   |
| CX3CR1        | chemokine (C-X3-C) receptor 1 (Cx3cr1) mRNA.                                                                       | NM_009987.2    | 1.5435 |   |
| FOLR2         | folate receptor 2 (fetal) (Folr2), mRNA.                                                                           | NM_008035.1    | 1.5354 |   |
| 5133400G04RIK | RIKEN cDNA 5133400G04 gene (5133400G04Rik), transcript variant 2, mRNA.                                            | NM_029485.1    | 1.5328 |   |
| COL3A1        | collagen, type III, alpha 1 (Col3a1), mRNA.                                                                        | NM_009930.1    | 1.5317 | * |
| CCNB1         | cyclin B1 (Ccnb1), mRNA.                                                                                           | NM_172301.3    | 1.5308 |   |

|               |                                                                           |                |        |   |
|---------------|---------------------------------------------------------------------------|----------------|--------|---|
| HMG2          | high mobility group nucleosomal binding domain 2 (Hmgn2), mRNA.           | NM_016957.3    | 1.5306 |   |
| 5830416A07RIK | zinc finger CCCH-type containing 18 (Zc3h18), transcript variant 1, mRNA. | NM_001029993.1 | 1.5283 |   |
| VAV1          | vav 1 oncogene (Vav1), mRNA.                                              | NM_011691.3    | 1.5251 |   |
| POLD1         | polymerase (DNA directed), delta 1, catalytic subunit (Pold1), mRNA.      | NM_011131.2    | 1.5233 |   |
| CHAF1B        | chromatin assembly factor 1, subunit B (p60) (Chaf1b), mRNA.              | NM_028083.3    | 1.5227 |   |
| SRPX          | sushi-repeat-containing protein (SrpX), mRNA.                             | NM_016911.4    | 1.5225 | * |
| DAB2          | disabled 2 mitogen-responsive phosphoprotein (Dab2) mRNA                  | NM_023118.1    | 1.5198 | * |
| MDK           | midkine (Mdk), transcript variant 1, mRNA.                                | NM_010784.4    | 1.5185 |   |
| EVI2A         | ecotropic viral integration site 2a (Evi2a), transcript variant 2, mRNA.  | NM_010161.3    | 1.5179 | * |
| 6430706D22RIK | RIKEN cDNA 6430706D22 gene (6430706D22Rik), mRNA.                         | NM_198652.1    | 1.5165 |   |
| PLCG2         | phospholipase C, gamma 2 (Plcg2), mRNA.                                   | NM_172285.1    | 1.5154 |   |
| NID2          | nidogen 2 (Nid2), mRNA.                                                   | NM_008695.2    | 1.5066 | * |
| 1810009M01RIK | transmembrane protein 176B (Tmem176b), mRNA.                              | NM_023056.3    | 1.5054 |   |
| C1QB          | complement component 1, q subcomponent, beta polypeptide (C1qb), mRNA.    | NM_009777.2    | 1.5032 | * |
| IL1RL1        | interleukin 1 receptor-like 1 (Il1rl1), transcript variant 2, mRNA.       | NM_010743.1    | 1.5023 |   |

**S4 A Table: Genes (61) downregulated by PTHrP<sub>1-36</sub> treatment. Fold change <0.65 , p value< 0.05**

| Target ID     | Definition (all probes: <i>Mus musculus</i> )                                               | RefSeq ID                     | Fold change      | Up regulated by both Og and ablation |
|---------------|---------------------------------------------------------------------------------------------|-------------------------------|------------------|--------------------------------------|
| AQP5          | aquaporin 5 (Aqp5), mRNA.<br>similar to aquaporin 5 (LOC100046616), mRNA.                   | NM_009701.4<br>XM_001476512.1 | 0.3705<br>0.4987 | *                                    |
| FOSB          | FBJ osteosarcoma oncogene B (Fosb), mRNA.                                                   | NM_008036.2                   | 0.4476           |                                      |
| TNFRSF11B     | tumor necrosis factor receptor superfamily, member 11b (osteoprotegerin) (Tnfrsf11b), mRNA. | NM_008764.3                   | 0.4687           | *                                    |
| HSPB1         | heat shock protein 1 (Hspb1), mRNA.                                                         | NM_013560.1                   | 0.4871           | *                                    |
| MRPPLF3       | prolactin family 2, subfamily c, member 4 (Prl2c4), mRNA.                                   | NM_011954.2                   | 0.5052           | *                                    |
| NKD2          | naked cuticle 2 homolog ( <i>Drosophila</i> ) (Nkd2), mRNA.                                 | NM_028186.3                   | 0.515            | *                                    |
| A1450948      | AHNAK nucleoprotein 2 (Ahnak2), mRNA.                                                       | NM_001033476.1                | 0.5172           |                                      |
| PLF2          | prolactin family 2, subfamily c, member 3 (Prl2c3), mRNA.                                   | NM_011118.1                   | 0.5191           | *                                    |
| BDNF          | brain derived neurotrophic factor (Bdnf), transcript variant 3, mRNA.                       | NM_001048141.1                | 0.5335           | *                                    |
| TIMP3         | tissue inhibitor of metalloproteinase 3 (Timp3), mRNA.                                      | NM_011595.2<br>NM_011595.2    | 0.5338<br>0.6268 | *                                    |
| CRYAB         | crystallin, alpha B (Cryab), mRNA.                                                          | NM_009964.1                   | 0.5387           | *                                    |
| INHBB         | PREDICTED: similar to Inhbb protein (LOC100046802), mRNA.                                   | XM_001476835.1                | 0.5494           |                                      |
| ASS1          | argininosuccinate synthetase 1 (Ass1), mRNA.                                                | NM_007494.3                   | 0.5595           | *                                    |
| ESD           | esterase D/formylglutathione hydrolase (Esd), mRNA.                                         | NM_016903.2                   | 0.5693           | *                                    |
| ZFP36         | zinc finger protein 36 (Zfp36), mRNA.                                                       | NM_011756.4                   | 0.5767           |                                      |
| INHBA         | inhibin beta-A (Inhba), mRNA.                                                               | NM_008380.1                   | 0.5792           | *                                    |
| PRSS19        | kallikrein related-peptidase 8 (Klk8), mRNA.                                                | NM_008940.2                   | 0.5806           |                                      |
| 3110050N22RIK | family with sequence similarity 164, member A (Fam164a), mRNA.                              | NM_173181.3                   | 0.5834           |                                      |
| CD44          | CD44 antigen (Cd44), transcript variant 2, mRNA.                                            | NM_001039150.1                | 0.5864           |                                      |
| JUNB          | Jun-B oncogene (Junb), mRNA.                                                                | NM_008416.1                   | 0.5893           |                                      |
| CDKN1A        | cyclin-dependent kinase inhibitor 1A (P21) (Cdkn1a), mRNA.                                  | NM_007669.2                   | 0.592            |                                      |
| THBD          | thrombomodulin (Thbd), mRNA.                                                                | NM_009378.2                   | 0.5953           |                                      |
| GREM1         | gremlin1 (Grem1) mRNA.                                                                      | NM_011824.1                   | 0.5979           | *                                    |
| GDF15         | growth differentiation factor 15 (Gdf15), mRNA.                                             | NM_011819.1                   | 0.5986           | *                                    |
| MUSTN1        | musculoskeletal, embryonic nuclear protein 1 (Mustn1), mRNA.                                | NM_181390.1                   | 0.6016           | *                                    |
| MDM2          | transformed mouse 3T3 cell double minute 2 (Mdm2), mRNA.                                    | NM_010786.2                   | 0.6034           | *                                    |
| ECM1          | extracellular matrix protein 1 (Ecm1), mRNA.                                                | NM_007899.1                   | 0.6041           |                                      |
| DUSP1         | dual specificity phosphatase 1 (Dusp1), mRNA.                                               | NM_013642.2                   | 0.609            |                                      |
| KCTD10        | potassium channel tetramerisation domain containing 10 (Kctd10), mRNA.                      | NM_026145.3                   | 0.6113           | *                                    |
| D4BWG0951E    | DNA segment, Chr 4, Brigham & Women's Genetics 0951 expressed (D4Bwg0951e), mRNA.           | NM_026821.4                   | 0.613            |                                      |

|               |                                                                                  |                |        |   |
|---------------|----------------------------------------------------------------------------------|----------------|--------|---|
| MYD116        | myeloid differentiation primary response gene 116 (Myd116), mRNA.                | NM_008654.1    | 0.6156 |   |
| RGS16         | regulator of G-protein signaling 16 (Rgs16), mRNA.                               | NM_011267.2    | 0.6157 |   |
| OCIL          | C-type lectin domain family 2, member d (Clec2d), mRNA.                          | NM_053109.2    | 0.6171 |   |
| SCMH1         | sex comb on midleg homolog 1 (Scmh1), mRNA.                                      | NM_013883.1    | 0.6175 |   |
| TRP53INP1     | transformation related protein 53 inducible nuclear protein 1 (Trp53inp1), mRNA. | NM_021897.1    | 0.6187 |   |
| CCND1         | cyclin D1 (Ccnd1), mRNA.                                                         | NM_007631.2    | 0.6205 |   |
| PHLDA1        | pleckstrin homology-like domain, family A, member 1 (Phlda1), mRNA.              | NM_009344.1    | 0.6228 |   |
| EEF1A2        | eukaryotic translation elongation factor 1 alpha 2 (Eef1a2), mRNA.               | NM_007906.2    | 0.6231 | * |
| WHRN          | whirlin (Whrn), transcript variant 3, mRNA.                                      | NM_001008792.1 | 0.6237 |   |
| COL4A1        | procollagen, type IV, alpha 1 (Col4a1), mRNA.                                    | NM_009931.1    | 0.6247 |   |
| EPHX1         | epoxide hydrolase 1, microsomal (Ephx1), mRNA.                                   | NM_010145.2    | 0.6255 |   |
| ANXA8         | annexin A8 (Anxa8), mRNA.                                                        | NM_013473.3    | 0.6258 |   |
| FOS           | FBJ osteosarcoma oncogene (Fos), mRNA.                                           | NM_010234.2    | 0.6262 |   |
| VEGFB         | vascular endothelial growth factor B (Vegfb), mRNA.                              | NM_011697.2    | 0.6287 |   |
| UNC5B         | unc-5 homolog B (C. elegans) (Unc5b), mRNA.                                      | NM_029770.2    | 0.6295 |   |
| THBS1         | thrombospondin 1 (Thbs1), mRNA.                                                  | NM_011580.3    | 0.6345 |   |
| HIST1H4H      | histone cluster 1, H4h (Hist1h4h), mRNA.                                         | NM_153173.2    | 0.635  |   |
| VAT1          | vesicle amine transport protein 1 homolog (T californica) (Vat1), mRNA.          | NM_012037.2    | 0.64   |   |
| BC065120      | zinc finger, MIZ-type containing 1 (Zmiz1), mRNA.                                | NM_183208.2    | 0.6402 |   |
| E430002G05RIK | RIKEN cDNA E430002G05 gene (E430002G05Rik), mRNA.                                | NM_173749.3    | 0.6412 |   |
| STMN2         | stathmin-like 2 (Stmn2), mRNA.                                                   | NM_025285.2    | 0.645  |   |
| PVRL2         | poliovirus receptor-related 2 (Pvrl2), mRNA.                                     | NM_008990.2    | 0.6454 |   |
| 3110050N22RIK | family with sequence similarity 164, member A (Fam164a), mRNA.                   | NM_173181.1    | 0.6461 |   |
| PHF17         | PHD finger protein 17 (Phf17), mRNA.                                             | NM_172303.3    | 0.6468 |   |
| SLC4A2        | solute carrier family 4 (anion exchanger), member 2 (Slc4a2), mRNA.              | NM_009207.2    | 0.6499 |   |
| HSP105        | heat shock protein 105 (Hsp105) mRNA.                                            | NM_013559.1    | 0.652  |   |
| CYR61         | cysteine rich protein 61 (Cyr61), mRNA.                                          | NM_010516.1    | 0.6523 |   |
| SLC39A6       | solute carrier family 39 (metal ion transporter), member 6 (Slc39a6), mRNA.      | NM_139143.2    | 0.6535 |   |
| SCX           | scleraxis (Scx), mRNA.                                                           | NM_198885.2    | 0.6554 | * |
| BAG3          | BCL2-associated athanogene 3 (Bag3), mRNA.                                       | NM_013863.4    | 0.6559 |   |
| SCA2          | ataxin 2 (Atxn2), mRNA.                                                          | NM_009125.2    | 0.657  |   |
| PKIA          | protein kinase inhibitor, alpha (Pkia), mRNA.                                    | NM_008862.3    | 0.6583 |   |
